# Supplementary material for: TOR Inhibitors Synergistically Suppress the Growth and Development of Phytophthora infestans, a Highly Destructive Pathogenic Oomycete
Source: Front Microbiol. 2021 Apr 16;12:596874. doi: 10.3389/fmicb.2021.596874 (PMC8086431; doi:10.3389/fmicb.2021.596874)
Supplement: Supplementary Table 7 — Top 30 GO terms in (A) RAP, (B) AZD and (C) RAP + AZD samples. (D) 22 co-existing GO terms in RAP, AZD and RAP + AZD samples. [file Table_7.XLSX]

## Sheet: Table S7A
Top 30 GO term in RAP sample
GO_accession	Description	Term_type	Over_represented_pValue	Corrected_pValue	DEG_item	DEG_list	Bg_item	Bg_list	Up	Up_Gene_names	Down	Down_Gene_names
GO:0044424	intracellular part	cellular_component	3.6878e-36	1.5356e-32	1173	5719	1697	10234	428	PITG_05511,PITG_08383,Novel00946,Novel00179,PITG_18788,PITG_16198,PITG_17699,PITG_05705,PITG_06263,PITG_19530,PITG_05630,PITG_09866,PITG_01913,PITG_16812,PITG_13309,PITG_08681,PITG_09425,PITG_15078,PITG_17153,PITG_13016,PITG_06237,PITG_19608,Novel01425,PITG_11365,PITG_10887,PITG_07057,PITG_01041,Novel01321,Novel01801,PITG_06914,PITG_18540,Novel01056,PITG_03060,PITG_07296,PITG_05680,PITG_15136,PIT…	745	PITG_07059,PITG_01154,PITG_13735,PITG_10916,PITG_02502,PITG_11366,PITG_15463,PITG_01762,PITG_12754,PITG_06719,PITG_10455,PITG_03550,PITG_05601,PITG_04468,PITG_03804,PITG_05840,PITG_10198,PITG_07887,PITG_00633,PITG_01184,PITG_12961,PITG_00302,PITG_13672,PITG_21033,PITG_00980,PITG_08348,PITG_09404,PITG_21222,PITG_13416,PITG_03551,PITG_00089,PITG_13007,PITG_13427,PITG_11452,PITG_12049,PITG_06257,PIT…
GO:0005622	intracellular	cellular_component	1.2117e-34	2.5228e-31	1409	5719	2091	10234	533	Novel01542,PITG_05564,PITG_08093,PITG_02749,PITG_13681,PITG_23091,Novel00651,Novel00549,PITG_05595,PITG_04012,PITG_01651,PITG_02798,PITG_11099,Novel00981,PITG_17750,Novel01120,PITG_09552,Novel00400,PITG_06771,Novel00094,PITG_01944,Novel01629,PITG_05777,PITG_09524,PITG_12292,PITG_02323,PITG_09439,Novel01356,PITG_03423,PITG_17365,PITG_00538,PITG_10310,PITG_00078,PITG_01943,PITG_10316,Novel01666,PIT…	876	PITG_19212,PITG_00625,PITG_17072,PITG_09475,PITG_00262,PITG_03860,PITG_11752,PITG_02867,PITG_15621,PITG_06479,PITG_00172,PITG_01056,PITG_01171,PITG_12697,PITG_00514,PITG_18053,PITG_19242,Novel00934,PITG_02533,PITG_11417,PITG_03657,PITG_05636,PITG_06410,PITG_20798,PITG_18720,PITG_03220,PITG_04992,PITG_01649,PITG_08000,PITG_07904,PITG_03468,PITG_00594,Novel01230,PITG_09270,PITG_13319,PITG_03015,PIT…
GO:0005623	cell	cellular_component	1.6274e-33	1.6941e-30	1476	5719	2209	10234	573	PITG_09628,PITG_07230,PITG_08703,PITG_05592,PITG_06856,Novel01271,Novel00557,Novel00242,PITG_12161,PITG_01169,PITG_19280,PITG_17407,PITG_15638,PITG_06981,PITG_12285,PITG_02593,PITG_06204,PITG_06450,PITG_03696,PITG_06416,PITG_11979,PITG_07254,PITG_02420,PITG_00578,PITG_03855,PITG_17348,PITG_18360,PITG_18813,Novel00142,PITG_11647,PITG_03818,PITG_10791,PITG_15549,PITG_03399,PITG_06637,PITG_17408,PIT…	903	PITG_13728,PITG_07051,PITG_02637,PITG_12578,PITG_17978,PITG_00293,PITG_18049,PITG_02328,PITG_12300,PITG_01105,PITG_23128,PITG_02198,PITG_14022,PITG_04333,PITG_05317,PITG_06679,PITG_13831,PITG_16018,PITG_08711,PITG_08094,PITG_05175,PITG_12692,PITG_05381,PITG_07399,PITG_05757,PITG_02346,PITG_08447,PITG_00117,PITG_07125,PITG_15053,PITG_11028,PITG_05498,PITG_11812,PITG_17461,PITG_19178,PITG_16741,PIT…
GO:0044464	cell part	cellular_component	1.6274e-33	1.6941e-30	1476	5719	2209	10234	573	PITG_17408,PITG_06637,PITG_14727,PITG_15723,PITG_10791,PITG_15549,PITG_03399,PITG_18360,Novel00142,PITG_11647,PITG_18813,PITG_03855,PITG_17348,PITG_00578,PITG_03818,PITG_06416,PITG_06450,PITG_03696,PITG_02420,PITG_11979,PITG_07254,PITG_17407,PITG_02593,PITG_06204,PITG_06981,PITG_12285,PITG_15638,PITG_19280,PITG_01169,PITG_12161,Novel01271,PITG_06856,PITG_05592,Novel00242,Novel00557,PITG_08703,PIT…	903	PITG_03277,PITG_06819,PITG_00236,PITG_03978,PITG_05141,PITG_10416,PITG_19178,PITG_17461,PITG_11812,PITG_05498,PITG_16741,PITG_07125,PITG_00117,PITG_11028,PITG_15053,PITG_12692,PITG_07399,PITG_05381,PITG_05757,PITG_08094,PITG_05175,PITG_08447,PITG_02346,PITG_05317,PITG_16018,PITG_08711,PITG_13831,PITG_06679,PITG_14022,PITG_02198,PITG_04333,PITG_02328,PITG_18049,PITG_23128,PITG_01105,PITG_12300,PIT…
GO:0005737	cytoplasm	cellular_component	1.997e-26	1.6631e-23	615	5719	856	10234	194	Novel01138,PITG_07269,PITG_08809,Novel00841,PITG_18056,PITG_10146,PITG_18373,PITG_13312,Novel00461,PITG_21503,PITG_13676,Novel00667,Novel01352,PITG_05408,PITG_12947,Novel01214,PITG_03956,PITG_13371,PITG_17512,PITG_22715,PITG_01042,PITG_06995,PITG_16757,PITG_19164,PITG_01943,Novel01666,Novel00521,PITG_22020,Novel01356,PITG_00179,PITG_02827,PITG_03353,PITG_03486,Novel01568,PITG_09552,PITG_05607,Nov…	421	PITG_08462,PITG_21644,PITG_04918,PITG_16328,PITG_08002,PITG_01607,PITG_12819,PITG_06604,PITG_18233,PITG_19042,PITG_09627,PITG_17016,PITG_12462,PITG_12151,PITG_17716,PITG_11127,PITG_06735,PITG_17452,PITG_13151,Novel01263,PITG_00144,PITG_18248,PITG_09846,PITG_19939,PITG_14456,PITG_07999,Novel00216,PITG_03790,PITG_09315,PITG_09441,PITG_11047,PITG_02122,PITG_08714,PITG_04337,PITG_03460,PITG_16366,PIT…
GO:0032991	macromolecular complex	cellular_component	2.2985e-21	1.5952e-18	600	5719	858	10234	239	PITG_05079,PITG_13371,Novel01214,PITG_12947,PITG_05408,Novel01352,PITG_15140,PITG_03956,PITG_13312,Novel01282,PITG_09728,PITG_13676,PITG_03488,PITG_00045,PITG_21503,PITG_07269,Novel00841,PITG_08809,PITG_18056,PITG_07299,PITG_10146,PITG_07327,PITG_13681,Novel01103,PITG_11983,PITG_04012,Novel01526,PITG_11099,Novel01297,PITG_04843,PITG_08295,PITG_08093,PITG_11526,PITG_03486,PITG_09524,PITG_12221,Nov…	361	PITG_02339,PITG_03233,PITG_10938,PITG_11143,PITG_08346,PITG_03767,PITG_13301,PITG_10929,PITG_09441,PITG_09699,PITG_04337,PITG_16366,PITG_06118,PITG_02755,PITG_01580,PITG_04133,PITG_00819,PITG_20725,PITG_14362,PITG_08757,PITG_09875,PITG_05628,PITG_03611,PITG_11437,PITG_06595,PITG_02054,PITG_01535,PITG_05631,PITG_13151,PITG_06735,PITG_02343,PITG_10827,PITG_13980,PITG_00683,Novel01105,PITG_07999,PIT…
GO:0043226	organelle	cellular_component	2.3504e-20	1.3981e-17	821	5719	1222	10234	338	PITG_02694,PITG_03235,PITG_17166,PITG_04567,PITG_03417,PITG_17673,PITG_16116,PITG_09279,PITG_06748,PITG_05445,PITG_14460,PITG_10202,PITG_18634,PITG_03239,PITG_09563,PITG_00444,PITG_20688,PITG_14353,PITG_20189,PITG_07651,Novel00558,PITG_22135,PITG_02043,PITG_15652,PITG_00215,Novel01674,PITG_10829,PITG_06706,PITG_00443,PITG_19310,PITG_03452,PITG_03762,PITG_16107,PITG_10193,Novel01394,PITG_20727,PIT…	483	PITG_02286,PITG_17883,PITG_10369,PITG_01300,PITG_10794,PITG_11272,PITG_03881,PITG_01229,PITG_02267,PITG_02197,PITG_10993,PITG_05458,PITG_19007,PITG_12682,PITG_08452,PITG_15696,PITG_10430,PITG_13250,PITG_19535,PITG_20502,PITG_17936,PITG_18696,PITG_00062,PITG_01528,PITG_19448,PITG_21077,PITG_13015,PITG_06596,PITG_00476,PITG_22689,PITG_00204,PITG_00634,PITG_10203,PITG_09527,PITG_17507,PITG_02796,PIT…
GO:0043229	intracellular organelle	cellular_component	3.0277e-20	1.5759e-17	814	5719	1212	10234	334	PITG_17408,PITG_21941,PITG_06637,Novel01881,PITG_15723,PITG_02578,PITG_04908,PITG_15549,PITG_17501,PITG_14622,PITG_03855,PITG_17348,PITG_18813,PITG_11647,PITG_07823,PITG_16008,PITG_12760,PITG_12584,PITG_06450,PITG_04334,PITG_06416,PITG_06895,PITG_15625,PITG_05512,PITG_11979,PITG_07254,PITG_02420,PITG_03223,PITG_17407,PITG_02593,PITG_06204,PITG_15638,PITG_18052,Novel01806,PITG_12285,PITG_06981,PIT…	480	PITG_03277,PITG_12684,PITG_03005,PITG_00763,PITG_05989,PITG_00236,PITG_06819,PITG_03978,PITG_05141,PITG_10416,PITG_19178,PITG_01389,PITG_09438,PITG_11812,PITG_20348,PITG_07125,PITG_05192,PITG_10593,PITG_15053,PITG_19361,PITG_00620,PITG_07399,PITG_12692,PITG_05757,PITG_05353,PITG_02346,PITG_19157,PITG_05317,PITG_01242,PITG_05174,PITG_15016,PITG_14022,PITG_17069,PITG_10513,PITG_06385,PITG_09956,PIT…
GO:0044444	cytoplasmic part	cellular_component	2.165e-18	1.0017e-15	386	5719	537	10234	144	PITG_15549,PITG_02578,PITG_17501,Novel00732,PITG_03178,PITG_21941,PITG_17408,PITG_06637,PITG_09442,PITG_15723,PITG_07300,PITG_04334,PITG_02113,PITG_10922,PITG_19999,PITG_02489,PITG_16008,PITG_08834,PITG_19669,PITG_19280,PITG_05250,PITG_12745,Novel01095,PITG_18052,Novel00015,PITG_15638,PITG_10863,PITG_01833,PITG_08703,PITG_13500,PITG_02053,PITG_15090,Novel00557,PITG_03660,PITG_09563,PITG_20688,PIT…	242	PITG_01997,PITG_09438,PITG_06424,PITG_12684,PITG_14608,PITG_05696,PITG_00763,PITG_00910,PITG_04529,PITG_12692,PITG_21393,PITG_05998,PITG_20192,PITG_04564,PITG_14765,PITG_09525,PITG_19551,PITG_05192,PITG_10926,PITG_09795,PITG_18025,PITG_05174,PITG_03626,PITG_17069,PITG_19157,PITG_03993,PITG_02627,PITG_13728,PITG_03700,PITG_08001,PITG_14854,PITG_12578,PITG_15571,PITG_07974,PITG_06385,PITG_09890,PIT…
GO:0005575	cellular_component	cellular_component	1.5738e-16	6.5532e-14	2274	5719	3724	10234	993	PITG_00882,PITG_03064,PITG_22262,PITG_08959,PITG_08409,PITG_09507,Novel01646,PITG_04250,PITG_12545,PITG_05618,PITG_03951,PITG_03756,PITG_13023,PITG_07663,PITG_17493,PITG_01222,PITG_08416,PITG_20371,PITG_01608,PITG_23177,PITG_13122,PITG_04701,PITG_10012,PITG_13003,Novel01059,PITG_00631,PITG_01170,Novel00373,PITG_06000,PITG_06856,PITG_19101,Novel01761,Novel01271,PITG_05592,PITG_01993,PITG_06782,PIT…	1281	PITG_04710,PITG_09702,PITG_16334,PITG_19461,PITG_00299,PITG_11743,PITG_01180,PITG_00688,PITG_12260,PITG_00140,PITG_17048,PITG_01755,PITG_13177,PITG_11701,PITG_07960,PITG_03998,PITG_01302,PITG_10972,PITG_00310,PITG_14943,PITG_22459,PITG_05007,PITG_20901,PITG_02174,PITG_04006,PITG_11912,PITG_12881,PITG_16506,PITG_06651,PITG_03547,PITG_16103,PITG_08544,PITG_15573,PITG_05404,PITG_15920,PITG_06660,PIT…
GO:0003735	structural constituent of ribosome	molecular_function	8.9909e-16	3.4035e-13	109	5719	133	10234	83	PITG_00443,PITG_13500,PITG_01041,PITG_08959,PITG_10146,PITG_01833,PITG_10863,PITG_01943,PITG_06799,PITG_08703,PITG_22323,PITG_15407,PITG_10887,PITG_08809,PITG_15090,PITG_06237,Novel00841,PITG_03660,PITG_01042,PITG_02053,PITG_07269,PITG_16757,PITG_06995,PITG_20188,Novel01095,PITG_21503,PITG_10193,PITG_03353,PITG_03762,PITG_05171,PITG_09345,PITG_13676,PITG_03221,PITG_19669,Novel01157,PITG_19280,PIT…	26	PITG_18054,PITG_17785,PITG_03420,PITG_09506,PITG_11734,PITG_09627,PITG_08548,PITG_11923,PITG_03768,PITG_20798,PITG_12193,PITG_05174,PITG_06636,PITG_09631,PITG_19157,Novel01230,PITG_19531,PITG_19007,PITG_04337,PITG_09525,PITG_12697,PITG_00523,PITG_04382,PITG_19448,PITG_06596,PITG_14608
GO:0030529	ribonucleoprotein complex	cellular_component	1.1131e-15	3.8624e-13	168	5719	219	10234	112	PITG_06262,PITG_13681,PITG_15697,Novel01526,PITG_07300,PITG_15723,PITG_11099,PITG_09442,PITG_02578,PITG_04843,Novel01297,PITG_14850,PITG_03178,PITG_03294,PITG_03486,PITG_02592,PITG_05680,PITG_03818,PITG_08834,PITG_16008,PITG_03477,PITG_11766,PITG_07173,PITG_04334,PITG_09552,PITG_06771,PITG_15069,PITG_19999,PITG_05512,PITG_09540,PITG_14913,Novel00695,PITG_17093,PITG_15638,Novel00015,PITG_18052,PIT…	56	PITG_14608,PITG_10482,PITG_15653,PITG_17072,PITG_19178,PITG_03040,PITG_04382,PITG_01171,PITG_19551,PITG_12697,PITG_09525,PITG_10969,PITG_13600,PITG_11417,PITG_02736,PITG_07055,PITG_23192,PITG_19531,Novel01230,PITG_17240,PITG_22264,PITG_19157,PITG_14575,PITG_03993,PITG_09631,PITG_05174,PITG_12193,PITG_20798,PITG_05006,PITG_07306,PITG_06482,PITG_02467,PITG_18862,PITG_02476,PITG_09506,PITG_12932,PIT…
GO:0005840	ribosome	cellular_component	7.413e-15	2.3745e-12	117	5719	146	10234	89	PITG_15638,Novel00015,PITG_18052,PITG_17261,PITG_16446,PITG_00179,PITG_14913,PITG_17093,PITG_13312,PITG_00941,PITG_09345,PITG_03221,PITG_13676,PITG_05171,PITG_03762,PITG_10193,PITG_03353,Novel01095,PITG_21503,PITG_20188,PITG_01922,PITG_12745,PITG_19280,Novel01157,PITG_19669,PITG_19608,Novel00841,PITG_03660,PITG_06237,PITG_15090,PITG_08809,PITG_06995,PITG_16757,PITG_07269,PITG_02053,PITG_01042,PIT…	28	PITG_09631,PITG_19531,PITG_22264,Novel01230,PITG_19157,PITG_20798,PITG_03768,PITG_06636,PITG_05174,PITG_12193,PITG_11923,PITG_08548,PITG_09506,PITG_03420,PITG_17785,PITG_18054,PITG_09627,PITG_11734,PITG_14608,PITG_06596,PITG_19448,PITG_04382,PITG_04337,PITG_00523,PITG_12697,PITG_09525,PITG_07055,PITG_19007
GO:0043227	membrane-bounded organelle	cellular_component	1.3941e-13	3.8701e-11	562	5719	836	10234	193	PITG_03778,Novel00356,PITG_01697,Novel01100,Novel01687,PITG_03156,Novel01139,PITG_02592,PITG_02489,PITG_04002,Novel01890,PITG_03489,Novel01397,PITG_01579,PITG_20646,PITG_08960,Novel00558,PITG_07651,PITG_00444,PITG_15652,PITG_00215,PITG_02043,PITG_03417,PITG_04567,PITG_17166,PITG_05445,PITG_09279,PITG_06748,PITG_14460,PITG_17673,PITG_16116,Novel01394,PITG_16107,PITG_20727,PITG_19310,Novel01674,PIT…	369	Novel01232,PITG_19533,PITG_08366,PITG_10482,Novel01227,PITG_17391,PITG_10602,PITG_13029,PITG_00542,PITG_14765,PITG_14260,PITG_20192,PITG_01737,PITG_03523,PITG_10969,PITG_06394,PITG_21568,PITG_09795,PITG_16006,PITG_16969,PITG_01975,PITG_04941,PITG_05990,PITG_15571,PITG_02476,PITG_05993,PITG_08001,PITG_05692,PITG_14603,PITG_13158,PITG_07103,PITG_02627,PITG_01204,PITG_18435,PITG_00513,PITG_07546,PIT…
GO:0043231	intracellular membrane-bounded organelle	cellular_component	1.3941e-13	3.8701e-11	562	5719	836	10234	193	PITG_01547,PITG_03956,Novel01214,PITG_02887,Novel01352,PITG_17070,Novel01250,PITG_11198,PITG_16114,Novel00220,PITG_16526,Novel00016,PITG_08996,PITG_20662,PITG_11796,PITG_14912,PITG_12749,PITG_07299,PITG_20250,Novel01473,PITG_06356,PITG_18688,Novel01282,Novel00461,PITG_00686,Novel00094,PITG_01944,PITG_01653,Novel00981,PITG_13133,PITG_09524,PITG_05564,PITG_00530,Novel01526,PITG_14911,PITG_23091,Nov…	369	PITG_03497,PITG_05486,PITG_03611,PITG_05628,PITG_00765,PITG_14231,PITG_02054,PITG_01580,PITG_14362,PITG_20725,PITG_00819,PITG_16366,PITG_09699,PITG_13426,PITG_09441,PITG_18412,PITG_06545,PITG_09315,PITG_05557,PITG_10929,PITG_03492,PITG_11143,PITG_04868,PITG_17716,PITG_05676,PITG_11127,PITG_17950,PITG_01510,PITG_17016,PITG_00988,PITG_08189,PITG_18233,PITG_19042,PITG_08002,PITG_12819,PITG_03364,PIT…
GO:0006412	translation	biological_process	1.7112e-13	4.4535e-11	223	5719	306	10234	108	PITG_00179,Novel00015,PITG_15638,PITG_18052,PITG_17093,PITG_04747,PITG_17009,PITG_14913,Novel01095,PITG_03353,PITG_05171,PITG_12745,Novel01157,PITG_19669,PITG_19280,PITG_01922,PITG_15090,PITG_03660,PITG_12077,PITG_02053,PITG_01042,PITG_22715,PITG_16757,PITG_06995,PITG_14596,PITG_03093,PITG_13500,PITG_22020,PITG_01943,PITG_08703,PITG_06911,PITG_10863,PITG_01833,PITG_22323,PITG_11099,PITG_09442,PIT…	115	PITG_13831,PITG_09631,PITG_03993,PITG_05781,PITG_05301,PITG_05649,PITG_12864,PITG_20689,PITG_07797,PITG_19157,Novel01230,PITG_17240,PITG_09234,PITG_09791,PITG_16915,PITG_19531,PITG_09932,PITG_04992,PITG_08579,PITG_20798,PITG_04640,PITG_05174,PITG_12193,PITG_20747,PITG_06482,PITG_10941,PITG_01036,PITG_00397,PITG_17748,PITG_16556,PITG_10110,PITG_14557,PITG_18054,PITG_02580,PITG_09506,PITG_17785,PIT…
GO:0006518	peptide metabolic process	biological_process	7.6167e-13	1.8656e-10	232	5719	323	10234	111	PITG_03235,PITG_03480,PITG_16198,PITG_03712,PITG_03956,PITG_02694,PITG_12524,PITG_10202,PITG_12947,PITG_10263,PITG_00631,PITG_20189,PITG_13371,PITG_09563,PITG_03239,PITG_20795,PITG_22135,Novel00167,PITG_04729,PITG_01041,PITG_08959,PITG_10146,PITG_00443,PITG_15407,PITG_05058,PITG_10887,PITG_06799,Novel00841,PITG_06237,PITG_08809,PITG_11630,PITG_07991,PITG_07269,PITG_17153,PITG_17205,PITG_03762,PIT…	121	PITG_05628,PITG_19007,PITG_01184,PITG_01580,PITG_00302,PITG_17607,PITG_12961,PITG_14278,PITG_05007,PITG_03460,PITG_04337,PITG_08714,Novel00922,PITG_00523,PITG_03915,PITG_21071,PITG_19448,PITG_07885,PITG_07839,PITG_01762,PITG_21010,PITG_18882,PITG_05685,PITG_10916,PITG_12483,PITG_13735,PITG_11110,PITG_06440,PITG_06596,PITG_03420,PITG_12151,PITG_18018,PITG_03661,PITG_11734,PITG_13607,PITG_09627,PIT…
GO:0043043	peptide biosynthetic process	biological_process	1.164e-12	2.6926e-10	226	5719	314	10234	110	PITG_03093,PITG_14596,PITG_22020,PITG_13500,PITG_22323,PITG_06911,PITG_08703,PITG_01943,PITG_01833,PITG_10863,PITG_03660,PITG_15090,PITG_12077,PITG_06995,PITG_16757,PITG_02053,PITG_01042,PITG_22715,PITG_05171,PITG_03353,Novel01095,PITG_01922,PITG_12745,PITG_19280,PITG_19669,Novel01157,PITG_15638,Novel00015,PITG_18052,PITG_00179,PITG_04747,PITG_17009,PITG_14913,PITG_17093,PITG_06771,PITG_19999,PIT…	116	PITG_09506,PITG_02580,PITG_17785,PITG_10110,PITG_14557,PITG_18054,PITG_03322,PITG_10941,PITG_01036,PITG_06482,PITG_16556,PITG_17748,PITG_00397,PITG_20798,PITG_09932,PITG_08579,PITG_04992,PITG_05174,PITG_04640,PITG_20747,PITG_12193,PITG_20689,PITG_12864,PITG_07797,PITG_03993,PITG_13831,PITG_09631,PITG_05649,PITG_05301,PITG_05781,PITG_09791,PITG_16915,PITG_19531,Novel01230,PITG_17240,PITG_19157,PIT…
GO:0003723	RNA binding	molecular_function	7.5184e-12	1.6477e-09	222	5719	298	10234	100	PITG_06911,PITG_09987,PITG_10201,PITG_18717,PITG_22020,PITG_13500,PITG_08211,PITG_03093,PITG_16378,PITG_14596,Novel00521,PITG_03457,PITG_22434,Novel00614,PITG_17964,PITG_20903,PITG_17272,PITG_17407,PITG_17009,PITG_05536,PITG_10487,PITG_12285,PITG_06981,PITG_01215,PITG_11369,PITG_07173,PITG_04334,PITG_03308,PITG_03802,PITG_05512,PITG_03999,Novel00193,PITG_15740,PITG_18633,PITG_19679,PITG_08834,PIT…	122	PITG_12269,PITG_06610,PITG_09243,PITG_14557,PITG_14854,PITG_09506,PITG_02580,PITG_16556,PITG_00397,PITG_01045,PITG_02337,PITG_06482,PITG_16521,PITG_13114,PITG_01036,PITG_12355,PITG_10941,PITG_12193,PITG_20747,PITG_20377,PITG_01846,PITG_15606,PITG_04640,PITG_16548,PITG_05006,PITG_09932,PITG_14575,PITG_17240,PITG_11653,PITG_19531,PITG_16915,PITG_05649,PITG_05301,PITG_05781,PITG_03993,PITG_07797,PIT…
GO:0043234	protein complex	cellular_component	3.7005e-11	7.7044e-09	442	5719	648	10234	132	PITG_01504,PITG_12221,Novel01657,PITG_10165,PITG_11526,PITG_09524,Novel00094,Novel01178,PITG_06254,Novel01629,PITG_05607,Novel00981,PITG_05806,Novel00400,PITG_00666,PITG_06914,PITG_18540,Novel01056,PITG_11983,PITG_04012,Novel01103,PITG_08295,PITG_08093,Novel01297,PITG_02564,PITG_20195,Novel00344,PITG_16652,PITG_19164,PITG_17512,PITG_10520,Novel01666,PITG_06319,PITG_08358,PITG_12877,PITG_00538,PIT…	310	PITG_03783,PITG_13600,PITG_06322,PITG_03657,PITG_14462,PITG_08676,PITG_01317,PITG_01044,PITG_15890,PITG_06597,PITG_16071,PITG_08808,PITG_09260,PITG_00172,PITG_07985,PITG_17747,PITG_02867,PITG_15228,PITG_10601,PITG_17359,PITG_12141,PITG_13493,PITG_15810,PITG_19212,PITG_06452,PITG_02022,PITG_22200,PITG_12346,PITG_06482,PITG_21701,PITG_04342,PITG_10902,PITG_14573,PITG_11098,PITG_07903,PITG_10440,PIT…
GO:1901564	organonitrogen compound metabolic process	biological_process	8.4871e-11	1.6829e-08	557	5719	854	10234	198	PITG_17919,PITG_17093,PITG_14913,PITG_00417,PITG_05171,Novel01157,PITG_01922,PITG_08135,PITG_02354,PITG_03093,PITG_22323,PITG_17129,PITG_15697,PITG_03294,PITG_03291,PITG_14850,PITG_16480,Novel01571,PITG_05346,PITG_19679,PITG_05347,PITG_00471,PITG_10452,PITG_14634,PITG_16280,PITG_15069,PITG_17127,PITG_07173,PITG_11766,PITG_02363,PITG_01913,PITG_23229,PITG_09866,PITG_09345,PITG_08681,PITG_03221,PIT…	359	PITG_05301,PITG_15526,PITG_06454,PITG_17786,PITG_09402,PITG_00028,PITG_17133,PITG_20689,PITG_16966,PITG_09550,PITG_17240,PITG_19531,PITG_10139,PITG_13139,PITG_19932,PITG_00481,PITG_03685,PITG_16556,PITG_17748,PITG_09273,PITG_18298,PITG_06022,PITG_00636,PITG_09506,PITG_17925,PITG_01072,PITG_07841,PITG_00132,PITG_10601,PITG_20759,PITG_01711,PITG_00133,PITG_00543,PITG_04382,PITG_07888,PITG_06722,PIT…
GO:0005198	structural molecule activity	molecular_function	4.8978e-10	9.2702e-08	136	5719	186	10234	94	Novel01542,PITG_14850,PITG_04843,Novel01297,PITG_02578,Novel00732,PITG_03294,PITG_03178,PITG_15697,PITG_13681,Novel01245,PITG_09442,PITG_11099,PITG_15723,PITG_07300,PITG_09552,PITG_04334,PITG_07173,PITG_11766,PITG_09540,PITG_19999,PITG_15069,Novel01362,PITG_06771,PITG_03486,PITG_16008,Novel01572,PITG_08834,Novel01157,PITG_19669,PITG_19280,PITG_12745,PITG_01922,Novel01095,PITG_03353,PITG_05171,PIT…	42	PITG_02022,PITG_19212,PITG_04382,PITG_14608,PITG_10416,PITG_09525,PITG_12697,PITG_12193,PITG_05174,PITG_20798,PITG_17069,PITG_19157,Novel01230,PITG_19531,PITG_09631,PITG_02627,PITG_07103,PITG_18054,PITG_17785,PITG_09506,PITG_00156,PITG_19448,PITG_06596,PITG_02635,PITG_10203,PITG_15463,PITG_19007,PITG_02267,PITG_00523,PITG_04337,PITG_07999,PITG_06636,PITG_03768,PITG_07960,PITG_07949,PITG_11734,PIT…
GO:1901575	organic substance catabolic process	biological_process	1.6578e-09	3.0014e-07	176	5719	236	10234	41	Novel00114,PITG_12764,PITG_01169,PITG_20560,PITG_05071,Novel01666,PITG_00175,PITG_18361,PITG_05365,PITG_06788,PITG_17055,PITG_01920,PITG_16137,PITG_00578,PITG_05347,PITG_08411,PITG_16812,PITG_00077,PITG_03267,PITG_20350,PITG_03764,PITG_03075,PITG_03276,PITG_01761,Novel01321,PITG_18056,PITG_13483,PITG_17054,PITG_07283,PITG_18333,PITG_14123,Novel00223,PITG_09042,PITG_12946,PITG_06476,Novel00596,PIT…	135	PITG_18731,PITG_17945,PITG_03078,PITG_02786,PITG_02191,PITG_16671,PITG_16018,PITG_09402,PITG_15321,PITG_02724,PITG_16966,PITG_10513,PITG_03220,PITG_00177,PITG_08014,PITG_03601,PITG_09508,PITG_06016,PITG_20747,PITG_11431,PITG_03685,PITG_15850,PITG_06274,PITG_03698,PITG_05762,PITG_02546,PITG_19472,PITG_03081,PITG_06022,PITG_00636,PITG_10883,PITG_03700,PITG_13749,PITG_09706,PITG_13757,PITG_00279,PIT…
GO:1901566	organonitrogen compound biosynthetic process	biological_process	3.4892e-09	6.0538e-07	433	5719	662	10234	170	PITG_17261,PITG_02968,PITG_00941,PITG_02921,PITG_03762,PITG_20188,PITG_10193,Novel01218,PITG_02750,PITG_01761,PITG_17205,PITG_15417,PITG_13429,PITG_08959,PITG_00443,PITG_06799,PITG_20795,PITG_11393,Novel00167,PITG_22135,PITG_04729,PITG_00631,PITG_20189,PITG_10454,PITG_09563,PITG_03239,PITG_17516,PITG_08955,PITG_12524,PITG_02355,PITG_10202,PITG_10263,PITG_03235,PITG_03480,Novel01480,PITG_03712,PIT…	263	PITG_14639,PITG_06979,PITG_07234,PITG_03597,PITG_18538,PITG_09553,PITG_11139,PITG_12727,PITG_09726,PITG_06222,PITG_06048,PITG_06267,PITG_03768,PITG_08369,PITG_11111,PITG_05374,PITG_16024,PITG_08548,PITG_11923,PITG_20965,PITG_06749,PITG_17032,PITG_05953,PITG_03420,PITG_14936,PITG_00688,PITG_03678,PITG_03661,PITG_04708,PITG_11734,PITG_02854,PITG_11110,PITG_12483,PITG_06596,PITG_06440,PITG_09387,PIT…
GO:0043228	non-membrane-bounded organelle	cellular_component	5.971e-09	9.5628e-07	293	5719	437	10234	160	Novel01282,PITG_16446,PITG_13312,PITG_13676,PITG_09345,PITG_03221,PITG_03488,PITG_03043,PITG_11106,PITG_21503,PITG_00045,PITG_06237,PITG_19608,Novel00841,PITG_03458,PITG_08809,PITG_07269,PITG_06612,PITG_13016,PITG_15078,PITG_10146,PITG_01041,PITG_09614,PITG_03955,PITG_17081,PITG_10887,PITG_15407,PITG_06277,PITG_05234,PITG_11198,PITG_13371,PITG_18788,PITG_12947,PITG_16198,PITG_15175,PITG_01322,PIT…	133	PITG_02343,PITG_13980,PITG_03551,PITG_06636,PITG_07999,PITG_01607,PITG_08462,PITG_05676,PITG_00226,PITG_18091,PITG_09627,PITG_12841,PITG_06978,PITG_11366,PITG_15463,PITG_01154,PITG_03233,PITG_03550,PITG_12754,PITG_04337,PITG_01622,PITG_02755,PITG_00188,PITG_03804,PITG_11437,PITG_03611,PITG_09404,PITG_01535,PITG_02054,PITG_05631,PITG_20725,PITG_18579,PITG_09631,PITG_09270,PITG_13319,PITG_19531,PIT…
GO:0043232	intracellular non-membrane-bounded organelle	cellular_component	5.971e-09	9.5628e-07	293	5719	437	10234	160	PITG_18788,PITG_13371,PITG_11198,PITG_05234,PITG_06277,PITG_15175,PITG_16198,PITG_12947,PITG_00045,PITG_21503,PITG_11106,PITG_03221,PITG_09345,PITG_13676,PITG_03043,PITG_03488,PITG_13312,PITG_16446,Novel01282,PITG_15407,PITG_17081,PITG_10887,PITG_01041,PITG_09614,PITG_03955,PITG_10146,PITG_15078,PITG_13016,PITG_07269,PITG_06612,PITG_08809,PITG_03458,Novel00841,PITG_06237,PITG_19608,Novel01542,PIT…	133	PITG_12754,PITG_03550,PITG_03233,PITG_01154,PITG_15463,PITG_11366,PITG_20725,PITG_02054,PITG_01535,PITG_05631,PITG_09404,PITG_03611,PITG_11437,PITG_03804,PITG_02755,PITG_00188,PITG_01622,PITG_04337,PITG_07999,PITG_06636,PITG_03551,PITG_13980,PITG_02343,PITG_06978,PITG_09627,PITG_12841,PITG_18091,PITG_00226,PITG_05676,PITG_08462,PITG_01607,PITG_19212,PITG_04382,PITG_13493,PITG_06902,PITG_07985,PIT…
GO:0005634	nucleus	cellular_component	6.8655e-09	1.0588e-06	373	5719	557	10234	158	PITG_01697,Novel00356,PITG_03778,PITG_04908,PITG_14622,Novel01139,PITG_11647,PITG_02592,PITG_18813,PITG_03855,PITG_12760,PITG_12584,PITG_06416,PITG_03156,Novel01687,PITG_06895,PITG_05512,Novel01100,PITG_03223,PITG_02420,PITG_07254,PITG_11979,PITG_17407,PITG_06204,PITG_02593,PITG_12285,Novel01806,PITG_06981,PITG_04002,PITG_01169,PITG_08960,PITG_13196,PITG_11088,Novel00242,PITG_20646,PITG_03489,Nov…	215	PITG_03005,PITG_06819,PITG_00236,PITG_05989,Novel01227,PITG_03978,PITG_10416,PITG_10482,PITG_08366,PITG_19178,PITG_11812,PITG_19533,PITG_01389,Novel01232,PITG_10969,PITG_03523,PITG_19361,PITG_15053,PITG_01737,PITG_14260,PITG_07399,PITG_00542,PITG_05353,PITG_10602,PITG_13029,PITG_17391,PITG_02346,PITG_01975,PITG_05317,PITG_16006,PITG_21568,PITG_15016,PITG_10513,PITG_06394,PITG_03608,PITG_02328,PIT…
GO:0043603	cellular amide metabolic process	biological_process	1.989e-08	2.9579e-06	246	5719	369	10234	115	PITG_10193,PITG_21503,PITG_20188,PITG_09345,PITG_03221,PITG_08681,PITG_13676,PITG_03762,PITG_17261,PITG_02921,PITG_00941,PITG_09866,PITG_00443,PITG_10146,PITG_15417,PITG_08959,PITG_01041,PITG_06799,PITG_10887,PITG_05058,PITG_15407,PITG_07991,PITG_11630,PITG_08809,PITG_06237,Novel00841,PITG_17205,PITG_17153,PITG_07269,PITG_20189,PITG_00631,PITG_03239,PITG_09563,PITG_13371,PITG_20795,PITG_04729,Nov…	131	PITG_08369,PITG_11111,PITG_03768,PITG_00401,PITG_14456,PITG_10480,PITG_13427,PITG_06636,PITG_03597,PITG_07234,PITG_09846,PITG_03681,PITG_06048,PITG_06222,PITG_13596,PITG_10167,PITG_05694,PITG_18018,PITG_03420,PITG_12151,PITG_20386,PITG_02039,PITG_09627,PITG_04708,PITG_11734,PITG_13607,PITG_03661,PITG_11923,PITG_08548,PITG_07141,PITG_04918,PITG_16328,PITG_19448,PITG_21071,PITG_01762,PITG_07839,PIT…
GO:0010467	gene expression	biological_process	2.5057e-08	3.5979e-06	616	5719	981	10234	307	PITG_10289,PITG_06748,PITG_09279,PITG_05445,PITG_05314,PITG_10202,PITG_12524,Novel01443,PITG_17673,PITG_16116,PITG_03201,PITG_14853,PITG_17166,PITG_04567,PITG_03480,PITG_03235,PITG_02694,Novel00608,PITG_00215,PITG_04729,Novel01262,PITG_22135,PITG_07651,PITG_20189,PITG_03239,PITG_00444,PITG_19868,PITG_09563,PITG_03452,PITG_18542,PITG_06947,PITG_00443,Novel00284,PITG_06706,PITG_17261,PITG_02921,PIT…	309	PITG_04538,PITG_08452,PITG_01229,PITG_12050,PITG_19007,PITG_05128,PITG_02286,PITG_01300,PITG_19813,PITG_14566,PITG_06596,PITG_13015,PITG_18027,PITG_12483,PITG_21077,PITG_19448,PITG_21071,PITG_01528,PITG_08159,PITG_16519,PITG_07885,PITG_02526,PITG_17483,PITG_01923,PITG_05433,PITG_03420,PITG_11734,PITG_19113,PITG_03597,PITG_07234,PITG_06048,PITG_06222,PITG_11803,PITG_08369,PITG_11111,PITG_03768,PIT…
GO:0030163	protein catabolic process	biological_process	4.9587e-08	6.8827e-06	76	5719	91	10234	15	Novel01321,PITG_20560,PITG_03276,PITG_03075,PITG_01169,PITG_03267,PITG_00077,PITG_16812,Novel00114,PITG_12764,Novel01352,PITG_06231,PITG_16137,PITG_01920,PITG_05365	61	PITG_16214,PITG_00279,PITG_12122,PITG_09706,PITG_07656,PITG_00229,PITG_10883,PITG_03081,PITG_19472,PITG_02546,PITG_05762,PITG_12140,PITG_06817,PITG_06274,PITG_02288,PITG_11431,PITG_20747,PITG_09508,PITG_08014,PITG_01260,PITG_03220,PITG_02211,PITG_04917,PITG_10513,PITG_01797,PITG_02672,PITG_02724,PITG_02191,PITG_16671,PITG_18731,PITG_08210,PITG_14380,PITG_15890,PITG_05364,PITG_10119,PITG_19535,PIT…

## Sheet: Table S7B
Top 30 GO term in AZD sample
GO_accession	Description	Term_type	Over_represented_pValue	Corrected_pValue	DEG_item	DEG_list	Bg_item	Bg_list	Up	Up_Gene_names	Down	Down_Gene_names
GO:0044424	intracellular part	cellular_component	2.0725e-38	8.6298e-35	1134	5424	1697	10234	291	PITG_06637,PITG_16017,Novel01569,PITG_20086,PITG_01809,PITG_17407,Novel01806,Novel00782,PITG_03458,PITG_09280,Novel00535,PITG_00666,PITG_10165,PITG_05504,PITG_01477,PITG_06424,PITG_07905,PITG_20662,Novel01526,PITG_16652,PITG_17359,PITG_06660,Novel01103,PITG_13239,Novel01139,PITG_12760,PITG_17512,PITG_12840,PITG_18463,PITG_00215,PITG_02852,PITG_08236,Novel01542,PITG_03203,PITG_10514,PITG_16538,PIT…	843	PITG_17069,PITG_09521,PITG_18538,PITG_02502,PITG_02467,PITG_22323,PITG_17978,PITG_02420,PITG_06864,PITG_06636,PITG_08714,PITG_00930,PITG_05934,PITG_00186,PITG_09596,PITG_08809,PITG_05552,PITG_03483,PITG_03156,PITG_03364,PITG_00593,PITG_01897,PITG_01180,PITG_00236,PITG_08014,PITG_06545,PITG_10916,PITG_19551,PITG_18720,PITG_08746,PITG_04037,PITG_03768,Novel00643,PITG_18717,PITG_17516,PITG_21886,PIT…
GO:0005737	cytoplasm	cellular_component	5.2534e-37	1.0938e-33	621	5424	856	10234	117	Novel01214,Novel00822,PITG_10443,PITG_03597,PITG_16057,Novel00524,Novel01752,Novel00841,PITG_00388,PITG_00578,Novel01819,Novel00521,Novel00667,PITG_02685,PITG_17126,PITG_03067,PITG_22439,PITG_16922,PITG_08669,PITG_17016,PITG_05486,PITG_18158,PITG_17645,PITG_10309,PITG_12575,PITG_15100,PITG_02636,PITG_21110,PITG_10430,Novel01657,PITG_09402,Novel00620,PITG_12819,PITG_00211,PITG_21941,PITG_01697,PIT…	504	PITG_04482,PITG_12839,PITG_04487,PITG_05696,PITG_12151,PITG_02198,PITG_00074,PITG_05250,PITG_01778,PITG_06385,PITG_03239,PITG_17123,PITG_18392,PITG_14850,PITG_05557,PITG_00566,PITG_13728,PITG_14911,PITG_07240,PITG_14083,PITG_15359,PITG_12483,PITG_20688,PITG_03799,PITG_18025,PITG_14807,PITG_19802,PITG_13831,PITG_09553,PITG_01042,PITG_06755,PITG_00636,PITG_15015,PITG_08959,PITG_02798,PITG_08827,PIT…
GO:0005622	intracellular	cellular_component	4.8385e-36	6.7158e-33	1356	5424	2091	10234	398	PITG_05380,PITG_09539,PITG_17508,PITG_09886,PITG_18542,Novel00288,PITG_18813,PITG_23229,Novel01138,Novel01568,PITG_03362,PITG_06666,PITG_02791,PITG_13809,PITG_05601,PITG_03670,PITG_08141,PITG_18326,PITG_20749,PITG_05071,Novel01394,Novel01794,PITG_16668,PITG_02255,PITG_02087,PITG_02827,PITG_08198,Novel01157,PITG_07054,Novel01801,PITG_18475,PITG_14364,PITG_01504,PITG_02113,Novel00582,Novel01767,Nov…	958	PITG_01591,PITG_13007,PITG_13500,PITG_12275,PITG_14847,PITG_16071,PITG_16792,PITG_01121,PITG_09956,PITG_09424,PITG_17992,PITG_07797,PITG_00681,PITG_02286,PITG_03603,PITG_04887,PITG_14216,PITG_10838,PITG_04992,PITG_18237,PITG_09493,PITG_14765,PITG_18935,PITG_16969,PITG_06702,PITG_01184,PITG_03456,PITG_03220,PITG_17128,PITG_19813,PITG_16334,PITG_06749,PITG_14137,PITG_11082,PITG_02992,PITG_06320,PIT…
GO:0005623	cell	cellular_component	1.9196e-33	1.5987e-30	1414	5424	2209	10234	433	PITG_03670,PITG_05601,PITG_20749,Novel01394,PITG_05071,PITG_08141,PITG_18326,PITG_02255,Novel01794,PITG_16668,PITG_08198,Novel01157,PITG_07054,PITG_02087,PITG_02827,PITG_05380,PITG_09886,PITG_18542,PITG_09539,PITG_17508,PITG_08358,PITG_23229,Novel00288,PITG_18813,PITG_13809,Novel01568,Novel01138,PITG_03362,PITG_06666,PITG_02791,PITG_00914,PITG_12124,PITG_19310,PITG_03776,PITG_10753,PITG_18435,Nov…	981	PITG_16969,PITG_18935,PITG_14765,PITG_01184,PITG_06702,PITG_18237,PITG_09493,PITG_06749,PITG_14137,PITG_11082,PITG_03220,PITG_03456,PITG_17128,PITG_19813,PITG_16334,PITG_18892,PITG_17699,PITG_06237,PITG_05636,PITG_02992,PITG_06320,PITG_07051,PITG_04959,PITG_03915,PITG_02755,PITG_04468,PITG_09555,PITG_00229,PITG_18049,PITG_13500,PITG_12275,PITG_14847,PITG_16071,PITG_01591,PITG_13007,PITG_16792,PIT…
GO:0044464	cell part	cellular_component	1.9196e-33	1.5987e-30	1414	5424	2209	10234	433	PITG_01559,PITG_20087,PITG_16922,PITG_03043,PITG_22439,PITG_03936,PITG_15629,Novel00667,PITG_03117,PITG_05595,Novel01819,PITG_00388,Novel00841,PITG_16057,Novel01752,PITG_03597,Novel00763,PITG_10989,Novel00235,PITG_20381,PITG_10443,Novel01282,PITG_01946,PITG_18788,PITG_06966,Novel00822,PITG_00851,Novel01214,PITG_14396,PITG_01305,PITG_12914,PITG_09402,PITG_06388,PITG_17166,PITG_20706,Novel01105,PIT…	981	PITG_17785,PITG_10210,PITG_19164,PITG_10863,PITG_10777,PITG_18688,PITG_17072,PITG_00952,PITG_05840,PITG_05631,PITG_09450,Novel00279,PITG_02054,PITG_09728,PITG_05009,PITG_19608,PITG_17733,PITG_02476,PITG_18248,PITG_00538,PITG_03486,PITG_06222,PITG_22459,PITG_10110,PITG_23192,PITG_00117,PITG_13097,PITG_10198,PITG_08827,PITG_21176,PITG_02798,PITG_00636,PITG_17936,PITG_01042,PITG_20266,PITG_13831,PIT…
GO:1901564	organonitrogen compound metabolic process	biological_process	9.8377e-23	6.8274e-20	581	5424	854	10234	90	PITG_07905,PITG_01761,PITG_04515,Novel01666,Novel00819,PITG_02750,PITG_02050,PITG_03357,Novel01596,PITG_03291,PITG_09891,PITG_02852,PITG_11719,PITG_10077,PITG_00471,PITG_10138,PITG_19121,PITG_02757,PITG_02210,PITG_01065,PITG_02858,PITG_06672,PITG_11116,PITG_06016,PITG_18435,Novel01524,PITG_20491,PITG_14634,PITG_06147,PITG_08411,PITG_16061,PITG_17508,PITG_20350,PITG_05380,PITG_23229,Novel01157,PIT…	491	PITG_21886,PITG_04918,PITG_02355,PITG_14808,PITG_19551,PITG_10916,PITG_12037,PITG_14596,PITG_17516,PITG_03768,PITG_10979,PITG_00997,PITG_05347,PITG_17921,PITG_05363,PITG_15090,PITG_15294,PITG_15810,PITG_19780,PITG_17999,PITG_15566,PITG_06595,PITG_09631,PITG_16741,PITG_08002,PITG_05354,PITG_13749,PITG_22323,PITG_03678,PITG_06636,PITG_13402,PITG_02578,PITG_09521,PITG_06482,PITG_17606,PITG_03221,PIT…
GO:1901566	organonitrogen compound biosynthetic process	biological_process	1.3979e-20	8.3158e-18	458	5424	662	10234	49	PITG_03740,PITG_14634,PITG_06147,PITG_04715,Novel01524,PITG_11178,PITG_06672,PITG_17009,PITG_14920,PITG_02210,PITG_01065,Novel01157,PITG_17993,Novel01095,PITG_16480,PITG_03398,PITG_03660,PITG_00257,PITG_16757,PITG_16061,Novel01571,PITG_00211,PITG_03427,PITG_12121,PITG_17129,PITG_02750,PITG_02050,Novel00907,PITG_12940,PITG_01761,PITG_04515,PITG_15139,Novel00819,PITG_08669,Novel00400,PITG_11393,PIT…	409	PITG_05733,PITG_02039,PITG_12264,PITG_09635,PITG_00397,PITG_06845,PITG_01297,PITG_13924,PITG_13991,PITG_17205,PITG_13403,PITG_09627,PITG_15526,PITG_20746,PITG_20795,PITG_13596,PITG_00523,PITG_03712,PITG_05805,PITG_09234,PITG_06979,PITG_00179,PITG_09345,PITG_18054,PITG_14352,PITG_12727,PITG_10089,PITG_21071,PITG_05058,PITG_09550,PITG_13176,PITG_03978,PITG_04334,PITG_09563,PITG_14697,PITG_11139,PIT…
GO:0044444	cytoplasmic part	cellular_component	2.4502e-20	1.2753e-17	378	5424	537	10234	71	PITG_05485,PITG_06684,PITG_02489,PITG_09315,PITG_11178,Novel00094,Novel00285,PITG_02113,PITG_18435,PITG_19310,PITG_09890,Novel01456,Novel01352,PITG_13672,PITG_03417,PITG_03852,PITG_17508,Novel00620,PITG_09886,PITG_12819,PITG_19350,PITG_21941,PITG_10305,PITG_03060,PITG_23229,PITG_15549,PITG_11254,PITG_16757,PITG_03660,PITG_02087,Novel01157,PITG_07054,PITG_10922,Novel01794,Novel01095,PITG_06424,PIT…	307	PITG_11475,PITG_05377,PITG_05541,PITG_08703,PITG_11452,PITG_10858,PITG_20798,PITG_14362,PITG_09451,PITG_08548,PITG_04868,PITG_06719,PITG_10822,PITG_15228,PITG_10437,PITG_14195,PITG_17240,PITG_00062,PITG_12309,Novel00934,PITG_02627,PITG_11366,PITG_06910,PITG_05998,PITG_10972,PITG_00110,Novel01297,PITG_03360,PITG_22264,PITG_15621,PITG_00941,Novel00015,PITG_17287,PITG_16008,PITG_10887,PITG_21055,PIT…
GO:0006518	peptide metabolic process	biological_process	8.4638e-20	3.9159e-17	241	5424	323	10234	12	Novel01157,Novel01095,PITG_00388,PITG_03398,Novel00841,PITG_03660,PITG_19121,PITG_16757,PITG_03597,Novel01571,Novel00907,PITG_17009	229	PITG_11630,PITG_17785,PITG_20116,PITG_10146,PITG_10480,PITG_20264,PITG_03915,PITG_10863,PITG_09525,PITG_08579,PITG_09555,Novel00922,PITG_08206,PITG_08681,PITG_14729,PITG_13681,PITG_13174,PITG_03274,PITG_06237,PITG_13607,PITG_19280,PITG_06821,PITG_20386,PITG_02053,PITG_02580,PITG_14456,PITG_16023,PITG_01041,PITG_03294,PITG_04382,PITG_02992,PITG_02694,PITG_05301,PITG_19007,PITG_03322,PITG_06222,PIT…
GO:0006412	translation	biological_process	1.1354e-19	4.7278e-17	230	5424	306	10234	11	PITG_03597,PITG_16757,PITG_19121,PITG_03660,Novel00841,PITG_00388,PITG_03398,Novel01095,Novel01157,PITG_17009,Novel00907	219	PITG_20747,PITG_05685,PITG_14608,PITG_03239,PITG_12077,PITG_14850,PITG_03993,PITG_13500,PITG_18018,PITG_19531,PITG_10193,PITG_12839,PITG_04487,PITG_12151,PITG_17261,PITG_10974,PITG_09791,PITG_11110,PITG_06596,PITG_09866,PITG_08369,PITG_04729,PITG_20189,PITG_13371,PITG_07797,PITG_05174,PITG_16328,PITG_09540,PITG_06440,PITG_08959,PITG_07839,PITG_01943,PITG_03999,PITG_13600,PITG_01756,PITG_09506,PIT…
GO:0030529	ribonucleoprotein complex	cellular_component	3.2024e-19	1.2123e-16	170	5424	219	10234	16	Novel00695,Novel01526,PITG_16446,PITG_15089,PITG_17166,PITG_12932,PITG_16757,PITG_19121,PITG_03117,PITG_03660,Novel00841,PITG_05680,PITG_00388,Novel00179,Novel01095,Novel01157	154	Novel00643,PITG_03768,PITG_18717,PITG_15653,PITG_19551,PITG_02592,PITG_17240,PITG_05171,PITG_08703,PITG_20798,PITG_08548,PITG_22264,PITG_00941,PITG_03353,Novel01297,PITG_10969,PITG_05666,Novel00015,PITG_09631,PITG_16008,PITG_10887,PITG_10202,PITG_07269,PITG_11923,PITG_15638,PITG_11766,PITG_05006,PITG_19448,PITG_03916,PITG_15090,PITG_10871,PITG_14575,PITG_11099,PITG_06262,PITG_02593,PITG_03221,PIT…
GO:0032991	macromolecular complex	cellular_component	4.0982e-19	1.3443e-16	569	5424	858	10234	138	PITG_05503,PITG_19121,Novel01103,PITG_12195,Novel01139,PITG_13968,PITG_02671,PITG_17512,Novel00242,PITG_20032,PITG_00169,PITG_03203,PITG_11983,PITG_16538,PITG_10514,PITG_16446,PITG_03552,PITG_01809,Novel01806,PITG_00559,PITG_15967,PITG_15089,PITG_03288,PITG_10165,PITG_05504,PITG_00666,Novel00695,PITG_06424,PITG_09030,PITG_01477,Novel01666,PITG_05607,Novel01526,PITG_08093,PITG_03701,PITG_16652,PIT…	431	PITG_01717,PITG_01621,PITG_09289,PITG_03818,PITG_14854,PITG_02022,PITG_00631,PITG_19157,PITG_03700,PITG_08452,PITG_23128,PITG_13681,PITG_00156,PITG_15755,PITG_01041,PITG_02694,PITG_10146,PITG_12122,PITG_18696,PITG_01389,PITG_20264,PITG_01246,PITG_06263,PITG_08676,PITG_05512,PITG_03993,PITG_16735,PITG_11127,PITG_18579,PITG_01242,PITG_02564,PITG_14608,PITG_07903,PITG_06594,PITG_01510,PITG_05141,PIT…
GO:0043043	peptide biosynthetic process	biological_process	4.1969e-19	1.3443e-16	234	5424	314	10234	12	PITG_03660,PITG_19121,PITG_16757,PITG_03398,PITG_00388,Novel00841,Novel01095,Novel01157,Novel01571,PITG_03597,Novel00907,PITG_17009	222	PITG_01184,PITG_14278,PITG_03956,PITG_09289,PITG_03460,PITG_10167,PITG_06995,PITG_05009,PITG_18052,PITG_17733,PITG_12524,PITG_15697,PITG_06222,PITG_03486,PITG_10110,PITG_19157,PITG_07841,PITG_00631,PITG_04774,PITG_00910,PITG_13676,PITG_16556,PITG_17607,PITG_09846,PITG_06771,PITG_18518,PITG_21661,PITG_14729,PITG_08681,PITG_13681,Novel00922,PITG_13607,PITG_13174,PITG_03274,PITG_06237,PITG_19280,PIT…
GO:0043603	cellular amide metabolic process	biological_process	4.3261e-16	1.2867e-13	261	5424	369	10234	17	PITG_01065,PITG_17009,Novel01571,PITG_03398,PITG_16757,PITG_03660,Novel01157,Novel01095,PITG_08669,Novel00907,PITG_16457,PITG_03597,PITG_10138,Novel00841,PITG_00388,PITG_00578,PITG_19121	244	PITG_16937,PITG_08703,PITG_20798,PITG_08548,PITG_02921,PITG_14609,PITG_10941,PITG_04683,PITG_16669,PITG_17240,PITG_17153,PITG_01762,PITG_08955,PITG_09932,PITG_10516,PITG_00302,PITG_03681,PITG_00941,PITG_12961,Novel01297,PITG_02547,Novel00015,PITG_05781,PITG_19399,PITG_03661,PITG_13427,PITG_07141,PITG_10887,PITG_16008,PITG_15638,PITG_07269,PITG_06819,PITG_11766,PITG_03978,PITG_04334,PITG_09563,PIT…
GO:0043229	intracellular organelle	cellular_component	6.8405e-16	1.8989e-13	762	5424	1212	10234	214	PITG_00476,PITG_03223,PITG_12819,PITG_00038,Novel00620,PITG_00045,PITG_10305,Novel00946,PITG_14400,PITG_06748,PITG_11272,PITG_01697,PITG_21941,PITG_04701,PITG_00078,PITG_20250,PITG_03660,Novel01397,Novel01232,PITG_16117,PITG_16757,PITG_16114,PITG_17348,PITG_03657,PITG_15549,Novel00179,PITG_05680,PITG_00111,PITG_00175,PITG_08424,PITG_06950,PITG_05705,PITG_03488,PITG_18634,PITG_05485,PITG_03064,PIT…	548	PITG_10193,PITG_13029,PITG_13015,PITG_08591,PITG_03277,PITG_03233,PITG_06596,PITG_20348,PITG_06792,PITG_00663,PITG_08578,PITG_04499,PITG_07949,PITG_02421,PITG_05174,PITG_12877,PITG_09441,PITG_04337,PITG_13368,PITG_16366,PITG_08584,PITG_03178,PITG_09284,PITG_10929,PITG_03608,PITG_20031,PITG_20188,PITG_12049,PITG_19532,PITG_03956,PITG_11143,PITG_06891,PITG_14909,PITG_07960,PITG_12260,PITG_00036,PIT…
GO:0043226	organelle	cellular_component	1.9296e-15	5.0217e-13	766	5424	1222	10234	218	PITG_16801,PITG_13069,PITG_06416,Novel00763,PITG_18788,Novel01214,Novel00822,Novel01425,PITG_10443,PITG_20381,PITG_04599,Novel01282,PITG_17126,PITG_20087,PITG_03043,Novel00841,PITG_00388,PITG_03117,PITG_05595,PITG_16812,Novel01819,PITG_00989,PITG_03882,PITG_12104,PITG_03489,PITG_14420,PITG_06955,PITG_12176,PITG_05486,PITG_17016,PITG_12527,PITG_07299,PITG_19530,PITG_06388,PITG_17166,Novel00558,Nov…	548	PITG_16973,PITG_02143,PITG_01300,PITG_06755,PITG_01042,PITG_09553,PITG_00204,PITG_16492,PITG_16116,PITG_14807,PITG_15486,PITG_20688,PITG_12111,PITG_08959,PITG_13097,PITG_08827,PITG_17936,PITG_08755,PITG_15015,PITG_12839,PITG_04487,PITG_04482,PITG_20194,PITG_05557,PITG_14850,PITG_12743,PITG_20502,PITG_17021,PITG_11158,PITG_07902,PITG_07399,PITG_14911,PITG_13728,PITG_00226,PITG_01622,PITG_14912,PIT…
GO:0043604	amide biosynthetic process	biological_process	4.0246e-15	9.858e-13	250	5424	355	10234	15	PITG_03597,PITG_16457,Novel01571,Novel01157,Novel01095,Novel00841,PITG_03398,PITG_00388,PITG_16757,PITG_19121,PITG_03660,PITG_17009,PITG_08669,PITG_01065,Novel00907	235	PITG_20188,PITG_05694,PITG_04640,PITG_09506,PITG_01756,PITG_12483,PITG_17093,PITG_03235,PITG_03799,PITG_16198,PITG_11734,PITG_15393,PITG_03178,PITG_12535,PITG_04337,PITG_17748,PITG_13831,PITG_01042,PITG_09552,PITG_04992,PITG_07888,PITG_20189,PITG_04729,PITG_08369,PITG_05174,PITG_07797,PITG_13371,PITG_07839,PITG_06440,PITG_08959,PITG_09540,PITG_16328,PITG_13399,PITG_13600,PITG_03999,PITG_01943,PIT…
GO:0005840	ribosome	cellular_component	1.1556e-14	2.6365e-12	114	5424	146	10234	9	Novel00841,PITG_00388,PITG_03660,PITG_16757,PITG_16446,PITG_19121,Novel01157,PITG_15089,Novel01095	105	PITG_20798,PITG_17261,PITG_06596,PITG_08548,PITG_12839,PITG_04487,PITG_05171,PITG_08703,PITG_14850,PITG_19531,PITG_13500,PITG_10193,PITG_03768,PITG_03239,PITG_14608,PITG_03178,PITG_16198,PITG_11734,PITG_01042,PITG_09552,PITG_04337,PITG_03916,PITG_09506,PITG_19448,PITG_00266,PITG_20188,PITG_15090,PITG_03235,PITG_17093,PITG_20688,PITG_09540,PITG_09631,PITG_10202,PITG_16008,PITG_10887,PITG_08959,PIT…
GO:0003735	structural constituent of ribosome	molecular_function	1.203e-14	2.6365e-12	105	5424	133	10234	7	PITG_03660,PITG_19121,PITG_16757,PITG_00388,Novel00841,Novel01095,Novel01157	98	PITG_10193,PITG_14850,PITG_19531,PITG_13500,PITG_03239,PITG_14608,PITG_03768,PITG_06596,PITG_08548,PITG_20798,PITG_17261,PITG_08703,PITG_12839,PITG_04487,PITG_05171,PITG_15638,PITG_11923,PITG_07269,PITG_11766,PITG_01943,PITG_09540,PITG_09631,PITG_10202,PITG_10887,PITG_08959,PITG_16008,PITG_13371,Novel00015,PITG_05174,PITG_00941,PITG_20189,PITG_03353,Novel01297,PITG_01042,PITG_09552,PITG_04337,PIT…
GO:0009058	biosynthetic process	biological_process	1.9782e-14	4.1186e-12	936	5424	1517	10234	221	PITG_11393,Novel00142,Novel00400,Novel00215,PITG_08669,PITG_12527,PITG_14420,PITG_11402,PITG_15139,PITG_03755,PITG_12940,Novel00907,PITG_03778,PITG_15100,PITG_21598,Novel01363,PITG_05545,PITG_15534,PITG_03472,Novel01105,PITG_06935,PITG_17129,PITG_06388,Novel01822,Novel01425,PITG_20381,PITG_08022,PITG_16457,Novel00822,PITG_02362,PITG_03597,Novel00433,PITG_12676,PITG_06416,PITG_00718,PITG_16801,Nov…	715	PITG_02431,PITG_05405,PITG_00661,PITG_03101,PITG_05649,PITG_14557,PITG_05171,Novel00453,PITG_00988,PITG_06724,PITG_14918,PITG_16915,PITG_18545,PITG_05317,PITG_02307,PITG_01072,PITG_13404,PITG_04661,PITG_02925,PITG_06710,PITG_15778,PITG_01804,PITG_03353,PITG_03802,PITG_01229,PITG_12864,PITG_10454,PITG_08761,PITG_11111,PITG_18113,PITG_19314,PITG_10202,PITG_01036,PITG_12692,PITG_19993,PITG_01245,PIT…
GO:0005575	cellular_component	cellular_component	5.0827e-14	1.0078e-11	2149	5424	3724	10234	756	Novel01925,PITG_17863,PITG_05486,PITG_18959,PITG_08669,PITG_03041,PITG_07814,PITG_17122,PITG_17645,Novel00134,PITG_19602,PITG_00989,PITG_03882,PITG_00470,PITG_12940,PITG_06475,PITG_10309,PITG_06109,PITG_00348,PITG_09375,PITG_06862,PITG_03693,Novel00558,PITG_02487,PITG_06935,Novel01657,PITG_01387,PITG_03166,Novel01425,Novel01530,Novel01358,PITG_03665,Novel00524,PITG_12233,PITG_02362,PITG_04582,PIT…	1393	PITG_15653,PITG_04634,PITG_07638,PITG_04722,PITG_02637,PITG_01804,PITG_03725,PITG_16915,PITG_05511,PITG_09270,PITG_11111,PITG_05192,PITG_18853,PITG_03353,PITG_15505,PITG_10819,PITG_03401,PITG_03589,PITG_03916,PITG_22020,PITG_13151,PITG_05532,PITG_21222,PITG_12745,PITG_06673,PITG_12841,PITG_10967,PITG_04500,PITG_04398,PITG_03420,PITG_01217,PITG_08193,PITG_05293,PITG_10461,PITG_21378,PITG_04710,PIT…
GO:0044281	small molecule metabolic process	biological_process	6.4881e-14	1.228e-11	453	5424	676	10234	109	PITG_00719,PITG_00578,PITG_19474,PITG_02767,PITG_03067,PITG_15629,PITG_02757,PITG_02282,Novel01770,PITG_10443,PITG_02852,PITG_08365,PITG_09891,PITG_08125,PITG_11719,PITG_03291,Novel01596,PITG_13347,Novel00822,PITG_02594,PITG_16457,PITG_08022,PITG_16057,PITG_03597,PITG_02362,Novel01008,PITG_14071,PITG_10077,PITG_12996,PITG_00471,PITG_15100,PITG_12940,Novel00907,PITG_02750,PITG_10309,Novel00585,PIT…	344	PITG_05537,PITG_03900,PITG_02256,Novel01480,PITG_10452,PITG_06260,PITG_22685,PITG_19656,PITG_21619,PITG_18248,PITG_06222,PITG_20102,PITG_12300,PITG_05520,PITG_10110,PITG_13165,PITG_05374,PITG_19161,PITG_03700,PITG_12342,PITG_09846,PITG_04618,PITG_22572,PITG_13395,PITG_01188,PITG_13139,PITG_09092,PITG_08032,PITG_03322,PITG_01711,PITG_03620,PITG_03685,PITG_13429,PITG_03098,PITG_04698,PITG_13416,PIT…
GO:0044249	cellular biosynthetic process	biological_process	1.0676e-13	1.9328e-11	880	5424	1426	10234	210	PITG_09123,Novel01305,PITG_00513,Novel00695,Novel01605,PITG_02041,PITG_17089,Novel00819,PITG_01761,Novel00175,PITG_04515,Novel01325,Novel00789,PITG_08960,Novel00402,Novel01332,PITG_13727,PITG_02750,Novel00548,PITG_14166,Novel00585,PITG_17664,PITG_20086,PITG_13721,PITG_17407,Novel01806,PITG_09280,Novel00195,PITG_08365,PITG_00215,PITG_10333,PITG_09963,PITG_03291,Novel01596,PITG_08236,PITG_00471,Nov…	670	PITG_12037,PITG_10916,PITG_19551,PITG_16059,PITG_14808,PITG_18720,PITG_03768,Novel00643,PITG_17516,PITG_09389,PITG_14596,PITG_18053,PITG_21886,PITG_10195,PITG_01437,PITG_02355,PITG_08326,PITG_10186,PITG_04918,PITG_09631,PITG_07057,PITG_03523,PITG_06595,PITG_15566,PITG_00720,PITG_20803,PITG_05354,PITG_02391,PITG_16741,PITG_17921,PITG_10979,PITG_19780,PITG_15810,PITG_15294,PITG_15090,PITG_11028,PIT…
GO:1901576	organic substance biosynthetic process	biological_process	2.1939e-13	3.8064e-11	888	5424	1443	10234	213	PITG_03740,PITG_11979,Novel01580,PITG_18279,PITG_08199,PITG_07236,PITG_04113,PITG_04715,Novel00892,PITG_06428,Novel01386,PITG_11178,PITG_04823,PITG_07449,PITG_17009,Novel00595,PITG_17070,PITG_04110,Novel00154,PITG_14920,PITG_04663,PITG_13587,PITG_16480,PITG_03398,PITG_16114,Novel00179,PITG_00257,PITG_04012,Novel01232,PITG_16757,PITG_03660,Novel01262,PITG_20250,PITG_04701,PITG_06748,PITG_21941,PIT…	675	PITG_01135,PITG_00542,PITG_13924,PITG_23160,PITG_16691,PITG_17567,PITG_02039,PITG_10861,PITG_13596,PITG_00523,PITG_06979,Novel00467,PITG_17205,PITG_05058,PITG_21071,PITG_08366,PITG_03795,PITG_03978,PITG_20927,PITG_09563,PITG_12495,PITG_21214,PITG_12346,PITG_14352,PITG_12727,PITG_21393,PITG_07885,PITG_11139,PITG_17133,PITG_08955,PITG_07874,PITG_05998,PITG_18727,PITG_09932,PITG_10516,PITG_14936,PIT…
GO:0003723	RNA binding	molecular_function	3.6163e-12	6.0233e-10	215	5424	298	10234	20	PITG_20903,PITG_16378,PITG_12486,PITG_00483,Novel00521,PITG_23106,PITG_16548,Novel01125,Novel00524,PITG_12487,PITG_17222,PITG_03778,PITG_18633,PITG_16519,PITG_17407,PITG_11369,PITG_16521,PITG_02337,PITG_17009,Novel01386	195	PITG_14854,PITG_17733,PITG_19608,PITG_10487,PITG_16015,PITG_12524,PITG_13792,PITG_03457,PITG_03956,PITG_09728,PITG_02067,PITG_10167,PITG_22434,PITG_09289,PITG_14278,PITG_01184,PITG_16556,PITG_14610,PITG_21661,PITG_18518,PITG_17607,PITG_00910,PITG_23192,PITG_07308,PITG_02992,PITG_02694,PITG_05301,PITG_19007,PITG_02580,PITG_18998,PITG_16023,PITG_06821,PITG_15652,PITG_20386,PITG_09702,PITG_16525,PIT…
GO:0043227	membrane-bounded organelle	cellular_component	5.8347e-11	8.9984e-09	527	5424	836	10234	156	PITG_06660,Novel01526,PITG_20662,PITG_00513,Novel00535,PITG_09280,Novel01367,PITG_17407,Novel01806,Novel00782,PITG_20086,PITG_03552,PITG_06637,PITG_08960,PITG_04002,PITG_08236,Novel00242,Novel01681,Novel00461,PITG_00215,PITG_03005,PITG_15761,PITG_12760,PITG_13239,Novel01139,PITG_00530,PITG_18412,Novel01103,PITG_05503,PITG_03306,PITG_02489,PITG_09315,Novel00094,PITG_14364,Novel00582,PITG_18475,PIT…	371	PITG_00997,PITG_14573,PITG_00262,PITG_10969,PITG_02391,PITG_08002,PITG_12278,PITG_12682,PITG_13158,PITG_03523,PITG_07057,PITG_03355,PITG_08765,PITG_06986,PITG_07053,PITG_18053,PITG_13250,PITG_01437,PITG_04384,PITG_02729,PITG_19533,PITG_06545,PITG_08011,PITG_00236,PITG_09101,PITG_08014,PITG_01897,PITG_17091,PITG_03483,PITG_19557,PITG_03156,PITG_03364,PITG_08953,PITG_00930,PITG_21054,PITG_05934,PIT…
GO:0043231	intracellular membrane-bounded organelle	cellular_component	5.8347e-11	8.9984e-09	527	5424	836	10234	156	Novel00242,PITG_08236,PITG_00215,Novel00461,Novel01681,PITG_04002,PITG_00530,PITG_18412,Novel01103,PITG_03306,PITG_05503,PITG_03005,PITG_15761,PITG_12760,Novel01139,PITG_13239,PITG_00513,Novel00535,PITG_06660,Novel01526,PITG_20662,PITG_08960,PITG_06637,PITG_09280,Novel01367,Novel00782,Novel01806,PITG_17407,PITG_03552,PITG_20086,PITG_00444,PITG_17508,PITG_17673,PITG_09539,PITG_09886,PITG_01293,Nov…	371	PITG_13172,PITG_02733,PITG_09547,PITG_17109,PITG_12181,PITG_01510,PITG_15906,PITG_00442,PITG_05692,PITG_07233,PITG_12427,PITG_23065,PITG_12820,Novel01227,PITG_01701,PITG_15358,PITG_02564,PITG_17950,PITG_15837,PITG_07103,PITG_05512,PITG_11127,PITG_01756,PITG_10083,PITG_05694,PITG_21701,PITG_00172,PITG_11100,PITG_03550,PITG_09816,PITG_11626,PITG_08452,PITG_08001,PITG_16462,PITG_18650,PITG_02022,PIT…
GO:0000502	proteasome complex	cellular_component	7.3355e-11	1.0909e-08	35	5424	35	10234	1	Novel01321	34	PITG_02672,PITG_11626,PITG_10883,PITG_08210,PITG_00633,PITG_11063,PITG_08014,PITG_10929,PITG_23176,PITG_18731,PITG_07887,PITG_01389,PITG_20266,PITG_00014,PITG_01064,PITG_12122,PITG_00172,PITG_22200,PITG_07903,PITG_19535,PITG_16671,PITG_03150,PITG_02191,PITG_08676,PITG_02239,PITG_03819,PITG_03220,PITG_01094,PITG_02339,PITG_15890,PITG_09706,PITG_16333,PITG_10513,PITG_03081
GO:0006082	organic acid metabolic process	biological_process	1.6249e-10	2.3331e-08	273	5424	395	10234	55	PITG_00029,PITG_06016,PITG_11116,PITG_19191,PITG_05485,PITG_02858,PITG_01065,PITG_02210,PITG_14634,PITG_21806,PITG_02857,PITG_00380,PITG_08135,PITG_20491,PITG_10305,PITG_20350,PITG_05380,PITG_03427,PITG_03724,PITG_10922,PITG_03398,PITG_06031,PITG_08110,PITG_01761,Novel01666,PITG_03078,PITG_05486,PITG_08669,PITG_01851,PITG_10430,PITG_17237,PITG_09402,PITG_10309,Novel00585,PITG_15100,Novel00907,PIT…	218	PITG_10516,PITG_00302,PITG_03681,PITG_10301,PITG_01762,PITG_08955,PITG_07141,PITG_17753,PITG_12462,PITG_03661,PITG_03598,PITG_06783,PITG_12961,PITG_19399,PITG_05127,PITG_10858,PITG_00132,PITG_11615,PITG_01195,PITG_20965,PITG_16937,PITG_05377,PITG_11065,PITG_11452,PITG_03498,PITG_00221,PITG_12161,PITG_10437,PITG_14195,PITG_17153,PITG_02921,PITG_04683,PITG_06015,PITG_21117,PITG_16806,PITG_14696,PIT…
GO:0043436	oxoacid metabolic process	biological_process	2.0696e-10	2.8435e-08	272	5424	394	10234	55	PITG_11719,PITG_08125,PITG_02852,PITG_10443,Novel01770,PITG_16457,PITG_08022,PITG_02594,Novel00822,PITG_03597,PITG_16057,PITG_12996,Novel01008,PITG_14071,PITG_00719,PITG_00578,PITG_02767,PITG_02757,PITG_02282,PITG_01851,PITG_08669,PITG_05486,Novel01666,PITG_03078,PITG_01761,Novel00907,PITG_15100,Novel00585,PITG_10309,PITG_09402,PITG_10430,PITG_17237,PITG_03427,PITG_05380,PITG_20350,PITG_10305,PIT…	217	PITG_13614,PITG_01654,PITG_00721,Novel00345,PITG_15850,PITG_12151,PITG_06021,PITG_03410,PITG_03738,PITG_02198,PITG_12514,PITG_05318,PITG_07671,PITG_01193,PITG_01970,PITG_02740,PITG_02049,PITG_07240,PITG_12053,PITG_18025,PITG_15057,PITG_07098,PITG_03440,PITG_09640,PITG_07349,PITG_13831,PITG_06755,PITG_21619,PITG_22685,PITG_19656,PITG_10452,PITG_03900,PITG_02256,PITG_12342,PITG_09846,PITG_03700,PIT…

## Sheet: Table S7C
Top 30 GO term in RAP+AZD sample
GO_accession	Description	Term_type	Over_represented_pValue	Corrected_pValue	DEG_item	DEG_list	Bg_item	Bg_list	Up	Up_Gene_names	Down	Down_Gene_names
GO:0005622	intracellular	cellular_component	3.4067e-25	1.4186e-21	1632	7076	2091	10234	544	PITG_00852,PITG_04908,PITG_05989,PITG_05517,Novel00167,PITG_05485,PITG_09430,PITG_03288,PITG_17508,PITG_01080,PITG_03872,PITG_01280,PITG_22857,PITG_18891,PITG_01504,PITG_16114,Novel01794,PITG_02143,PITG_04012,PITG_01044,Novel01473,Novel01767,Novel00747,Novel01367,PITG_16812,PITG_22616,PITG_00851,PITG_01852,PITG_13968,PITG_10141,PITG_19350,PITG_05423,PITG_20903,PITG_03040,PITG_11272,PITG_00804,PIT…	1088	Novel01557,PITG_10455,PITG_01125,PITG_21033,PITG_18717,PITG_10287,PITG_08959,PITG_11127,PITG_08746,PITG_16018,PITG_08366,PITG_18695,PITG_14697,PITG_21013,PITG_14765,PITG_20264,PITG_18892,PITG_01804,PITG_03322,PITG_08765,PITG_05628,Novel00015,PITG_10916,PITG_20725,PITG_06616,PITG_15505,PITG_10794,PITG_11143,PITG_09956,PITG_15015,PITG_20209,PITG_10836,PITG_02497,PITG_07797,PITG_01064,PITG_03150,PIT…
GO:0005623	cell	cellular_component	2.5215e-23	3.4999e-20	1710	7076	2209	10234	591	PITG_07950,PITG_03401,PITG_18759,PITG_00476,PITG_01056,PITG_23159,PITG_18106,PITG_12285,PITG_21220,PITG_10859,PITG_06637,PITG_07814,Novel01002,PITG_16289,Novel01263,PITG_07959,PITG_07248,PITG_02480,PITG_06356,PITG_14281,PITG_23065,PITG_06388,PITG_01136,PITG_00444,PITG_06748,PITG_06841,PITG_00578,PITG_17407,PITG_05608,PITG_05595,PITG_11726,PITG_17136,PITG_11652,PITG_10310,PITG_20893,Novel00086,PIT…	1119	PITG_02921,PITG_03915,PITG_06594,PITG_07645,PITG_06894,PITG_19157,PITG_19676,PITG_02054,PITG_13319,PITG_13427,PITG_02476,PITG_17516,PITG_01082,PITG_00110,PITG_07240,PITG_19065,PITG_01329,PITG_05557,PITG_06262,PITG_15090,PITG_13991,PITG_20965,PITG_20743,PITG_13500,PITG_10513,PITG_00819,PITG_10416,Novel00373,PITG_07902,PITG_18248,PITG_02043,PITG_05353,PITG_13371,PITG_20385,PITG_01756,PITG_16915,PIT…
GO:0044464	cell part	cellular_component	2.5215e-23	3.4999e-20	1710	7076	2209	10234	591	PITG_06240,PITG_09886,PITG_02791,PITG_08423,PITG_05954,PITG_03060,PITG_07126,PITG_17645,PITG_03790,PITG_18788,PITG_11205,PITG_03203,PITG_06273,PITG_01185,PITG_06630,PITG_16783,Novel00094,PITG_03756,PITG_17408,PITG_10507,PITG_09751,PITG_14770,PITG_00509,PITG_03223,PITG_01559,PITG_10158,PITG_06354,Novel00582,PITG_03858,PITG_13719,PITG_05486,PITG_03936,PITG_03831,PITG_13196,PITG_17493,PITG_18155,Nov…	1119	PITG_00633,PITG_08210,PITG_15463,PITG_02432,PITG_03156,PITG_00997,PITG_18421,PITG_00144,PITG_05433,PITG_04335,PITG_03221,PITG_03762,PITG_18010,PITG_08002,PITG_00302,PITG_05552,PITG_05636,PITG_00952,PITG_12286,PITG_11437,PITG_17091,PITG_08761,PITG_05380,PITG_13368,PITG_02327,PITG_07567,PITG_18237,PITG_02729,PITG_19531,PITG_09442,PITG_17261,PITG_05688,PITG_14456,PITG_08447,PITG_08709,PITG_04902,PIT…
GO:0044424	intracellular part	cellular_component	1.5943e-22	1.6596e-19	1333	7076	1697	10234	392	PITG_01850,Novel00285,PITG_08046,PITG_01154,PITG_03497,PITG_12754,PITG_17070,PITG_03018,PITG_06416,PITG_05564,PITG_03075,PITG_21617,Novel01801,PITG_11743,PITG_11272,PITG_02852,PITG_00804,Novel00461,PITG_02974,PITG_18634,PITG_10926,PITG_04012,PITG_02143,Novel01473,PITG_01044,PITG_16114,Novel01794,PITG_13968,PITG_01852,PITG_19350,PITG_05423,PITG_03040,PITG_20903,Novel01367,Novel00747,PITG_22616,PIT…	941	PITG_04870,PITG_11750,PITG_17490,PITG_15638,PITG_05302,PITG_02755,PITG_20349,PITG_07949,PITG_05701,PITG_03498,PITG_16198,PITG_12578,PITG_12697,PITG_17883,PITG_03364,PITG_01622,PITG_00717,PITG_01944,PITG_20195,PITG_02716,PITG_19314,PITG_03348,PITG_10973,PITG_05631,PITG_11475,PITG_11417,PITG_23091,PITG_09640,PITG_12839,PITG_03220,PITG_00941,PITG_12462,PITG_03486,PITG_12181,PITG_13016,PITG_06394,PIT…
GO:0005737	cytoplasm	cellular_component	1.3328e-18	1.11e-15	695	7076	856	10234	150	PITG_02068,PITG_02827,PITG_00578,PITG_20032,PITG_14281,Novel01263,Novel01002,PITG_06637,PITG_10165,PITG_05817,PITG_15078,PITG_01653,PITG_17425,PITG_17016,PITG_15089,PITG_06660,PITG_11254,PITG_09402,PITG_18437,PITG_07911,PITG_10832,PITG_18158,PITG_15761,Novel01138,PITG_08295,PITG_18435,PITG_05674,PITG_19310,PITG_01947,PITG_06684,PITG_06688,PITG_10650,PITG_03417,Novel01157,Novel01089,PITG_05607,PIT…	545	PITG_12881,PITG_08000,PITG_06222,PITG_10210,PITG_12427,PITG_14807,PITG_11100,PITG_06604,PITG_03142,PITG_08001,PITG_04333,PITG_02122,PITG_17785,PITG_03956,PITG_01296,PITG_12745,PITG_19180,PITG_02479,PITG_09345,PITG_00636,PITG_21644,PITG_05117,PITG_17123,PITG_03710,PITG_18720,PITG_09451,PITG_21378,PITG_17153,PITG_08579,PITG_01755,PITG_06482,PITG_20385,PITG_13371,PITG_18248,PITG_07904,PITG_13672,PIT…
GO:0032991	macromolecular complex	cellular_component	4.303e-15	2.9863e-12	684	7076	858	10234	192	Novel01794,Novel00557,PITG_04012,Novel01806,PITG_01044,Novel00747,PITG_16812,PITG_12326,PITG_01852,PITG_15281,PITG_13968,PITG_20903,PITG_03040,PITG_19350,PITG_01579,PITG_16108,PITG_16898,PITG_19121,PITG_05517,PITG_01088,Novel00167,PITG_03288,PITG_07973,PITG_03872,PITG_03701,PITG_01504,PITG_06416,PITG_05818,PITG_03018,PITG_07961,PITG_16538,PITG_08046,Novel00285,PITG_03064,PITG_01850,PITG_08093,PIT…	492	PITG_03881,PITG_02671,PITG_00980,PITG_05458,PITG_03818,PITG_10827,PITG_01246,PITG_03178,PITG_03767,PITG_11099,PITG_05391,PITG_12260,PITG_05141,PITG_04843,PITG_18731,PITG_00156,PITG_05630,PITG_15407,PITG_04529,PITG_03239,PITG_10858,PITG_01317,PITG_15723,PITG_01437,PITG_07885,PITG_01171,PITG_03081,PITG_00685,PITG_09550,PITG_07327,PITG_14729,PITG_18717,PITG_11127,PITG_08959,PITG_06428,Novel00841,PIT…
GO:0044444	cytoplasmic part	cellular_component	5.2662e-14	3.1326e-11	439	7076	537	10234	93	Novel00335,Novel01095,PITG_04846,PITG_03829,PITG_09751,PITG_17408,Novel00094,PITG_18541,PITG_09890,Novel01456,PITG_13239,PITG_10443,PITG_03203,PITG_06273,PITG_03790,Novel01542,PITG_03060,PITG_06280,Novel01657,PITG_03660,PITG_03522,PITG_17126,Novel00782,PITG_08348,PITG_07054,PITG_09886,PITG_01326,Novel01352,PITG_06735,PITG_10305,PITG_17512,PITG_10922,PITG_21110,PITG_02489,PITG_03832,PITG_14252,PIT…	346	PITG_14909,PITG_13312,PITG_08346,PITG_18025,PITG_08681,PITG_01041,PITG_09506,PITG_06771,PITG_14573,PITG_08827,Novel00325,PITG_00397,PITG_02588,PITG_21222,PITG_02053,PITG_06799,PITG_07173,PITG_12947,PITG_00266,PITG_00631,PITG_03768,Novel01819,PITG_20798,PITG_01217,PITG_03468,PITG_13728,PITG_10902,PITG_13151,PITG_15705,PITG_23128,PITG_03355,PITG_09525,PITG_13291,PITG_09627,PITG_02694,PITG_11734,PIT…
GO:0043226	organelle	cellular_component	3.184e-13	1.6573e-10	944	7076	1222	10234	307	PITG_16513,PITG_10083,Novel01157,PITG_07299,PITG_12358,PITG_08916,PITG_03417,PITG_06688,PITG_07034,PITG_01947,PITG_06684,PITG_19310,PITG_08236,PITG_05674,PITG_16801,PITG_08295,PITG_18435,PITG_03777,PITG_20250,PITG_10593,PITG_00666,PITG_15761,PITG_10831,PITG_12527,PITG_18417,PITG_18437,PITG_16652,PITG_12749,Novel01250,PITG_06935,Novel01139,PITG_01976,PITG_06660,PITG_09286,PITG_15089,PITG_17016,PIT…	637	PITG_04959,PITG_03550,PITG_11452,PITG_20795,PITG_12193,PITG_11038,PITG_07175,PITG_18054,PITG_10819,PITG_06819,PITG_19280,PITG_00220,PITG_19184,PITG_18688,PITG_20348,PITG_19608,PITG_11766,PITG_20031,PITG_16969,PITG_10461,PITG_17501,PITG_17706,PITG_00293,PITG_16666,PITG_00089,PITG_03389,PITG_01144,PITG_09475,PITG_13528,PITG_05126,PITG_04482,PITG_05840,PITG_06589,PITG_04722,PITG_10881,PITG_13158,PIT…
GO:0043229	intracellular organelle	cellular_component	3.8979e-13	1.8034e-10	936	7076	1212	10234	300	PITG_00666,PITG_10593,PITG_10831,PITG_15761,PITG_18435,PITG_08295,PITG_16801,PITG_05674,PITG_08236,PITG_20250,PITG_03777,PITG_03417,PITG_08916,PITG_06684,PITG_01947,PITG_07034,PITG_19310,PITG_06688,PITG_16513,PITG_07299,PITG_12358,Novel01157,PITG_10083,PITG_01653,Novel01881,PITG_06902,Novel00244,PITG_08994,PITG_04917,Novel00763,PITG_15078,PITG_08409,Novel01139,PITG_06780,PITG_11647,PITG_17425,PIT…	636	PITG_13032,PITG_06475,PITG_13158,PITG_18314,PITG_08809,PITG_04482,PITG_05126,PITG_05840,PITG_09475,PITG_01144,PITG_13528,PITG_03389,PITG_10881,PITG_04722,PITG_06589,PITG_11766,PITG_18688,PITG_20348,PITG_19608,PITG_17706,PITG_00293,PITG_00089,PITG_16666,PITG_10461,PITG_17501,PITG_20031,PITG_16969,PITG_11038,PITG_12193,PITG_03550,PITG_20795,PITG_11452,PITG_04959,PITG_19280,PITG_19184,PITG_00220,PIT…
GO:0030529	ribonucleoprotein complex	cellular_component	1.058e-12	4.4054e-10	189	7076	219	10234	14	PITG_03660,PITG_03040,Novel00167,PITG_19121,Novel01095,PITG_00388,Novel00695,PITG_16446,PITG_15089,Novel01526,PITG_01925,Novel01157,Novel00179,PITG_05680	175	PITG_19531,PITG_12745,PITG_05630,PITG_15407,PITG_09442,PITG_17261,PITG_03239,PITG_09345,PITG_18862,PITG_01042,PITG_04843,PITG_11923,PITG_11099,Novel01297,PITG_03818,PITG_10827,PITG_03178,PITG_01246,PITG_06482,PITG_06995,PITG_04382,PITG_05009,PITG_20688,PITG_14729,PITG_23192,PITG_05171,PITG_07327,PITG_22135,PITG_01171,PITG_17785,PITG_03956,PITG_03762,PITG_15723,PITG_19999,PITG_03221,PITG_22264,PIT…
GO:1901566	organonitrogen compound biosynthetic process	biological_process	5.4539e-12	1.9886e-09	528	7076	662	10234	86	PITG_00388,PITG_11085,PITG_02358,Novel00907,PITG_16088,PITG_14634,PITG_04715,PITG_00401,PITG_02973,PITG_12121,PITG_21021,PITG_18188,PITG_13604,Novel00351,PITG_13613,PITG_12940,PITG_17651,PITG_02750,PITG_02354,PITG_02363,Novel01095,PITG_11468,PITG_02362,PITG_02357,PITG_02353,PITG_06672,PITG_02361,PITG_14577,PITG_06911,PITG_05953,Novel01157,Novel01089,PITG_15267,PITG_09387,PITG_01955,PITG_17993,PIT…	442	PITG_09289,PITG_01762,PITG_02992,PITG_20188,PITG_18018,PITG_13831,PITG_03632,PITG_13600,PITG_16023,PITG_14596,PITG_10863,PITG_14850,PITG_01297,PITG_02663,PITG_13586,PITG_03295,PITG_15697,PITG_17133,PITG_16757,PITG_09631,PITG_16736,PITG_19007,PITG_09552,PITG_05851,PITG_01184,PITG_06821,PITG_16669,PITG_05374,PITG_04703,PITG_05318,PITG_05301,PITG_00543,PITG_08834,PITG_14668,PITG_13676,PITG_09866,PIT…
GO:0003723	RNA binding	molecular_function	5.7418e-12	1.9886e-09	256	7076	298	10234	42	PITG_03778,PITG_10857,PITG_16519,Novel01263,Novel00654,PITG_18633,PITG_16523,PITG_12285,PITG_17407,Novel01895,PITG_06546,PITG_16521,PITG_20903,PITG_17009,Novel00521,PITG_02337,PITG_11630,PITG_11369,PITG_06886,PITG_16378,PITG_12487,PITG_06911,PITG_16548,PITG_12486,PITG_08211,Novel01125,PITG_11728,PITG_08597,PITG_16517,PITG_17224,PITG_16524,PITG_23106,PITG_00483,PITG_17651,PITG_15081,PITG_11433,PIT…	214	PITG_03308,PITG_13806,PITG_14044,PITG_17607,Novel00744,PITG_15606,PITG_05781,PITG_11653,PITG_18717,PITG_14912,PITG_06048,PITG_20401,PITG_08959,PITG_02580,PITG_07797,PITG_12524,PITG_13500,PITG_13174,PITG_03712,PITG_01756,PITG_16915,PITG_14853,PITG_06440,PITG_08765,PITG_16138,PITG_05649,PITG_10916,PITG_03802,PITG_06262,PITG_09987,PITG_15393,PITG_09345,Novel00625,PITG_12269,PITG_12152,PITG_01246,PIT…
GO:1901564	organonitrogen compound metabolic process	biological_process	6.2083e-12	1.9886e-09	670	7076	854	10234	132	PITG_13395,PITG_00578,Novel00046,Novel00400,PITG_17009,PITG_16061,PITG_13030,PITG_02352,Novel00819,PITG_06147,PITG_17604,PITG_00294,PITG_06031,PITG_06672,Novel01770,PITG_03055,PITG_02361,PITG_09402,PITG_18437,PITG_05953,PITG_14577,PITG_06911,PITG_15267,PITG_09387,PITG_03299,PITG_01955,Novel01157,Novel01089,PITG_17993,PITG_15629,PITG_09400,PITG_18435,PITG_07349,PITG_12940,PITG_20491,PITG_09891,PIT…	538	PITG_09345,PITG_00636,PITG_01296,PITG_12745,Novel00453,PITG_04452,PITG_10264,PITG_07380,PITG_06595,PITG_04665,PITG_13165,PITG_06482,PITG_09579,PITG_13235,PITG_17153,PITG_14699,PITG_08579,PITG_02221,PITG_08000,PITG_06222,PITG_18298,PITG_08001,PITG_03738,PITG_13682,PITG_17785,PITG_03956,PITG_02968,PITG_13403,PITG_20350,PITG_13832,PITG_17516,PITG_13427,PITG_03915,PITG_06048,PITG_02921,PITG_19148,PIT…
GO:0005575	cellular_component	cellular_component	1.928e-11	5.7343e-09	2718	7076	3724	10234	1097	PITG_06641,PITG_08199,PITG_05545,PITG_09523,PITG_10305,PITG_15100,PITG_03951,PITG_20283,PITG_21110,PITG_19177,PITG_03946,Novel00146,PITG_22644,PITG_22554,PITG_06491,PITG_19888,PITG_04545,PITG_06231,PITG_00101,PITG_06328,Novel01103,PITG_21619,Novel01566,PITG_01954,PITG_07254,PITG_06860,PITG_08458,PITG_04377,PITG_12183,PITG_14623,PITG_16176,PITG_00337,PITG_07718,PITG_09131,PITG_09963,PITG_17673,PIT…	1621	PITG_05638,PITG_05245,PITG_06827,PITG_12684,PITG_08189,PITG_12049,PITG_01259,PITG_18089,PITG_16492,PITG_07092,PITG_19212,PITG_03954,PITG_16939,PITG_17022,PITG_20152,PITG_18579,PITG_04651,Novel00113,PITG_15652,PITG_10198,PITG_10024,PITG_19164,PITG_01778,PITG_11028,PITG_09355,PITG_20116,PITG_03993,PITG_03045,PITG_15553,PITG_03420,PITG_06864,Novel00216,PITG_09493,PITG_02566,PITG_16008,PITG_09438,PIT…
GO:0006412	translation	biological_process	2.7449e-11	7.6199e-09	255	7076	306	10234	15	PITG_03660,PITG_17009,PITG_17651,Novel00167,PITG_11728,PITG_19121,PITG_11468,Novel01095,Novel00907,PITG_00388,PITG_00401,PITG_14577,PITG_06911,PITG_11630,Novel01157	240	PITG_12745,PITG_19531,PITG_09345,PITG_21010,PITG_15393,PITG_15407,PITG_09442,PITG_20689,PITG_03239,PITG_17261,PITG_11923,Novel01297,PITG_11099,PITG_05007,PITG_07888,PITG_08579,PITG_13607,PITG_17153,PITG_09791,PITG_01042,PITG_12151,PITG_04843,PITG_04382,PITG_18251,PITG_05009,PITG_11111,PITG_03178,PITG_06482,PITG_06995,PITG_07234,PITG_07141,PITG_14729,PITG_09846,PITG_00302,PITG_03274,PITG_14278,PIT…
GO:0003735	structural constituent of ribosome	molecular_function	4.4858e-11	1.1674e-08	118	7076	133	10234	6	Novel01095,PITG_19121,Novel01157,Novel00167,PITG_00388,PITG_03660	112	PITG_20116,Novel00015,PITG_15069,PITG_11734,PITG_18052,PITG_10146,PITG_07269,PITG_00523,PITG_00443,PITG_09540,PITG_22323,PITG_15090,PITG_17093,PITG_19669,PITG_13500,PITG_10202,PITG_06237,PITG_00179,PITG_09525,PITG_10193,PITG_08809,PITG_02694,PITG_09627,PITG_01922,PITG_13371,PITG_14608,PITG_03294,PITG_08834,PITG_20795,PITG_07300,PITG_03768,PITG_00631,PITG_06799,PITG_07173,PITG_02053,PITG_12193,PIT…
GO:0006518	peptide metabolic process	biological_process	5.7736e-11	1.4142e-08	267	7076	323	10234	16	Novel00907,PITG_00388,PITG_00401,PITG_11468,Novel01095,PITG_11728,Novel00922,PITG_03660,PITG_17651,Novel01157,PITG_11630,PITG_06911,PITG_14577,PITG_19121,Novel00167,PITG_17009	251	PITG_09866,PITG_14668,PITG_13676,PITG_08834,PITG_04992,PITG_05301,PITG_04640,PITG_05405,PITG_10979,PITG_17240,PITG_09563,PITG_04487,PITG_20189,PITG_00443,PITG_17748,PITG_01255,PITG_07269,PITG_03799,PITG_22323,PITG_20116,PITG_03460,PITG_03993,PITG_10146,PITG_18052,PITG_16328,PITG_10193,PITG_05354,PITG_17727,PITG_03294,PITG_06505,PITG_21661,PITG_10974,PITG_21393,PITG_00179,PITG_10863,PITG_13600,PIT…
GO:0009058	biosynthetic process	biological_process	1.2318e-10	2.8497e-08	1149	7076	1517	10234	346	PITG_06309,PITG_03934,PITG_17070,PITG_06416,PITG_05522,PITG_02393,Novel01801,Novel00496,PITG_02356,PITG_23006,PITG_01065,PITG_02516,PITG_13432,PITG_22313,Novel01038,PITG_10926,PITG_21598,PITG_04012,PITG_02143,PITG_16114,PITG_06355,PITG_16974,PITG_04708,PITG_10141,PITG_13727,PITG_03040,Novel01767,PITG_03740,PITG_02329,PITG_05989,Novel00433,PITG_19147,Novel00167,PITG_04908,PITG_07866,Novel00654,PIT…	803	PITG_03900,PITG_22165,PITG_15638,PITG_05302,PITG_22657,PITG_05701,PITG_03498,PITG_18277,PITG_06358,PITG_16198,PITG_12578,PITG_12697,PITG_15449,PITG_03364,PITG_10080,PITG_06710,PITG_20195,PITG_03348,PITG_19314,PITG_10973,PITG_11457,PITG_12839,PITG_09640,PITG_19428,PITG_00941,PITG_12462,PITG_01711,PITG_03486,PITG_12181,Novel00836,PITG_08548,PITG_14589,PITG_03599,PITG_13845,PITG_13737,Novel00116,PIT…
GO:0043043	peptide biosynthetic process	biological_process	1.8345e-10	4.0204e-08	259	7076	314	10234	16	Novel00922,Novel01095,PITG_11468,PITG_11728,PITG_17651,PITG_03660,PITG_00401,PITG_00388,Novel00907,PITG_19121,Novel00167,PITG_17009,Novel01157,PITG_11630,PITG_14577,PITG_06911	243	PITG_11734,PITG_15069,PITG_21886,PITG_12483,PITG_14456,PITG_09540,PITG_08714,PITG_20386,PITG_17205,PITG_02694,PITG_09627,PITG_16556,PITG_09525,PITG_05058,PITG_03978,PITG_15566,PITG_12947,PITG_07173,PITG_06799,PITG_02053,PITG_03768,PITG_00631,PITG_16741,PITG_01217,PITG_20798,PITG_04918,PITG_06771,PITG_09506,PITG_09234,PITG_01041,PITG_08681,PITG_00397,PITG_22020,PITG_09932,PITG_03221,PITG_03762,PIT…
GO:1901576	organic substance biosynthetic process	biological_process	3.2667e-10	6.8013e-08	1093	7076	1443	10234	328	PITG_13604,Novel01105,PITG_21021,Novel01572,Novel00179,PITG_02550,PITG_04715,PITG_09123,PITG_16088,PITG_15534,PITG_00514,Novel01688,PITG_11085,PITG_02973,Novel01160,PITG_11189,PITG_04554,Novel01095,PITG_04701,PITG_02353,Novel01683,PITG_02357,PITG_11402,PITG_20629,PITG_02362,Novel00145,Novel01031,Novel01332,PITG_00557,PITG_11107,PITG_04442,PITG_02363,PITG_02354,PITG_08348,PITG_06204,PITG_02750,Nov…	765	PITG_05405,PITG_03056,PITG_17240,PITG_12053,PITG_09563,PITG_16526,PITG_20249,PITG_12942,PITG_00542,PITG_09304,PITG_05301,PITG_17727,PITG_11998,PITG_10974,PITG_02455,PITG_21393,PITG_00443,PITG_01235,PITG_11225,PITG_03460,PITG_03681,PITG_17133,PITG_13152,PITG_01203,PITG_01528,PITG_13586,PITG_10186,PITG_14850,PITG_10863,PITG_18275,PITG_13600,PITG_02391,PITG_11803,PITG_05679,PITG_02397,PITG_09289,PIT…
GO:0005840	ribosome	cellular_component	4.7853e-10	9.4885e-08	127	7076	146	10234	8	PITG_03660,PITG_00388,PITG_15089,PITG_16446,PITG_19121,Novel01157,Novel01095,Novel00167	119	PITG_10863,PITG_07055,PITG_04843,PITG_01042,PITG_10887,PITG_16008,PITG_01833,PITG_13681,PITG_11923,Novel01297,PITG_14913,PITG_11099,PITG_20188,PITG_03178,PITG_06995,PITG_03235,PITG_04334,PITG_05009,PITG_15638,PITG_06596,PITG_04382,PITG_09521,PITG_19531,PITG_15697,PITG_12745,PITG_05174,PITG_17261,PITG_03239,PITG_09442,PITG_15407,PITG_09345,PITG_14850,PITG_03420,PITG_09555,PITG_06636,PITG_09552,PIT…
GO:0044249	cellular biosynthetic process	biological_process	6.2272e-10	1.1786e-07	1079	7076	1426	10234	325	Novel00819,PITG_01056,PITG_00718,PITG_21860,PITG_17009,PITG_10310,PITG_05595,PITG_16061,PITG_07236,PITG_17407,PITG_06748,PITG_00444,PITG_06388,Novel00046,PITG_13252,PITG_06356,PITG_23065,PITG_15629,PITG_20250,PITG_08295,PITG_08236,PITG_04861,PITG_09387,PITG_06688,PITG_19310,PITG_06684,Novel01641,PITG_10083,PITG_05825,Novel00086,PITG_01653,Novel00337,PITG_06780,PITG_14071,PITG_06911,PITG_02361,Nov…	754	PITG_13371,PITG_16915,PITG_01756,PITG_13012,PITG_05353,PITG_20965,PITG_13991,PITG_15090,PITG_13500,PITG_10020,PITG_07991,PITG_07240,PITG_03678,PITG_14563,PITG_17516,PITG_21561,PITG_02054,PITG_19157,PITG_15392,PITG_03915,PITG_02921,PITG_06222,PITG_02968,PITG_03738,PITG_03795,Novel01280,PITG_10264,PITG_03523,PITG_07380,PITG_05317,PITG_09345,PITG_18720,PITG_13235,PITG_14699,PITG_01456,PITG_06482,PIT…
GO:0043603	cellular amide metabolic process	biological_process	1.6563e-08	2.9985e-06	294	7076	369	10234	24	PITG_15417,PITG_03660,PITG_17651,PITG_11728,PITG_11468,Novel01095,PITG_10138,Novel00922,PITG_16088,Novel00907,PITG_00388,PITG_00401,PITG_00578,PITG_17009,PITG_04708,Novel00167,PITG_19121,PITG_15831,PITG_06911,PITG_14577,PITG_11630,Novel01089,Novel01157,PITG_01065	270	PITG_19531,PITG_09442,PITG_20689,PITG_17261,PITG_00757,PITG_21010,PITG_09791,PITG_01042,Novel01297,PITG_11923,PITG_06995,PITG_04382,PITG_18251,PITG_05009,PITG_14278,PITG_00302,PITG_03274,PITG_07141,PITG_07234,PITG_09846,PITG_13735,PITG_08206,PITG_05171,PITG_14557,PITG_22135,PITG_05694,PITG_05733,PITG_13596,PITG_12077,PITG_03398,PITG_03762,PITG_19999,PITG_06454,PITG_03221,PITG_09932,PITG_22020,PIT…
GO:0043604	amide biosynthetic process	biological_process	1.0034e-07	1.741e-05	281	7076	355	10234	22	Novel00922,PITG_11728,PITG_11468,Novel01095,PITG_17651,PITG_15417,PITG_03660,PITG_00401,PITG_16088,Novel00907,PITG_00388,PITG_15831,Novel00167,PITG_19121,PITG_17009,PITG_04708,PITG_01065,PITG_11630,Novel01157,Novel01089,PITG_14577,PITG_06911	259	PITG_09525,PITG_14352,PITG_02694,PITG_09627,PITG_16556,PITG_17205,PITG_20386,PITG_12483,PITG_14456,PITG_08714,PITG_09540,PITG_11734,PITG_15069,PITG_21886,PITG_08681,PITG_09506,PITG_09234,PITG_06771,PITG_01041,PITG_09932,PITG_00397,PITG_22020,PITG_18545,PITG_01217,PITG_20798,PITG_04918,PITG_07173,PITG_02053,PITG_06799,PITG_16937,PITG_05058,PITG_03978,PITG_12947,PITG_15566,PITG_16741,PITG_03768,PIT…
GO:0044281	small molecule metabolic process	biological_process	1.2323e-07	2.0525e-05	527	7076	676	10234	155	PITG_21308,PITG_13604,PITG_02757,Novel01105,PITG_21021,PITG_18188,PITG_09722,PITG_17237,PITG_04715,PITG_14634,PITG_16088,PITG_10270,PITG_02358,PITG_11085,PITG_00719,Novel00907,PITG_03723,PITG_05486,PITG_12121,PITG_02973,PITG_20272,PITG_02857,PITG_04554,PITG_08135,PITG_11719,PITG_02353,PITG_02362,PITG_02357,PITG_01970,PITG_09891,PITG_07126,PITG_20491,PITG_12940,PITG_16203,PITG_06479,PITG_13613,PIT…	372	PITG_12053,PITG_10430,PITG_06021,PITG_05405,PITG_02256,PITG_21127,PITG_05377,PITG_21397,PITG_12942,PITG_05506,Novel00139,PITG_04717,PITG_13486,PITG_00543,PITG_02621,PITG_13614,PITG_05354,PITG_00765,PITG_02854,PITG_01235,PITG_11225,PITG_09726,PITG_04618,PITG_20687,PITG_16328,PITG_03681,PITG_00721,PITG_03460,PITG_03295,PITG_04851,PITG_17133,PITG_01297,PITG_15321,PITG_06891,PITG_00028,PITG_13831,PIT…
GO:0043227	membrane-bounded organelle	cellular_component	1.3851e-07	2.1344e-05	638	7076	836	10234	204	PITG_03516,PITG_01439,PITG_19527,Novel00179,PITG_00215,PITG_10829,PITG_12330,Novel01105,PITG_02489,Novel01890,PITG_13719,Novel01526,PITG_05486,Novel01160,PITG_13196,PITG_01288,PITG_00514,PITG_09315,Novel00907,PITG_03614,PITG_20502,PITG_21941,Novel01127,PITG_06273,Novel01031,Novel00145,PITG_09890,PITG_01515,PITG_04701,PITG_12104,Novel00094,PITG_20662,PITG_09751,PITG_03223,PITG_06354,Novel00582,PIT…	434	Novel01214,PITG_08747,PITG_06955,PITG_09280,PITG_15228,PITG_02267,PITG_21568,PITG_11998,PITG_10838,PITG_02255,PITG_03955,PITG_09965,PITG_11562,PITG_00765,PITG_10969,PITG_06385,PITG_14668,PITG_20249,PITG_15890,PITG_15053,PITG_00542,PITG_04468,PITG_10430,PITG_04500,PITG_11796,PITG_17273,PITG_01701,PITG_16526,PITG_17567,PITG_03611,PITG_00140,PITG_12743,PITG_00988,PITG_06409,PITG_01580,PITG_08014,PIT…
GO:0043231	intracellular membrane-bounded organelle	cellular_component	1.3851e-07	2.1344e-05	638	7076	836	10234	204	Novel00258,PITG_21110,PITG_03832,PITG_05545,PITG_08199,PITG_10305,PITG_05680,PITG_22644,PITG_08697,PITG_18650,Novel01103,PITG_06792,PITG_07254,Novel01566,PITG_14401,Novel01100,PITG_20192,PITG_10830,PITG_05503,PITG_14623,PITG_03043,PITG_16038,PITG_03670,PITG_04377,PITG_13426,PITG_06895,Novel01394,PITG_03829,PITG_17673,Novel00335,PITG_09131,PITG_01293,PITG_10443,Novel00242,PITG_13239,PITG_09278,Nov…	434	PITG_03852,PITG_01425,PITG_00236,PITG_11626,PITG_18171,PITG_02593,PITG_18233,PITG_16939,PITG_03551,PITG_16107,PITG_12684,PITG_18751,PITG_08189,PITG_12049,PITG_12309,PITG_22839,PITG_06827,PITG_18053,PITG_12692,PITG_17978,PITG_14497,PITG_02996,PITG_17507,PITG_07546,PITG_00538,PITG_19164,PITG_06981,PITG_13041,PITG_20647,Novel00113,PITG_15652,PITG_09438,PITG_09594,PITG_10972,PITG_19220,PITG_14420,PIT…
GO:0043234	protein complex	cellular_component	1.4352e-07	2.1344e-05	505	7076	648	10234	179	PITG_18062,PITG_08916,PITG_04133,PITG_07034,PITG_10938,PITG_05607,PITG_02110,PITG_07289,PITG_07319,PITG_16513,PITG_10989,PITG_06568,PITG_07299,PITG_11472,PITG_17359,PITG_15994,PITG_00666,PITG_15042,PITG_15629,PITG_00998,PITG_12521,PITG_08295,PITG_17879,PITG_06452,PITG_03180,PITG_10926,PITG_03777,PITG_08046,PITG_08093,PITG_02343,PITG_03064,Novel00285,PITG_01850,PITG_16652,PITG_12754,PITG_06719,PIT…	326	PITG_20348,PITG_14727,PITG_05631,PITG_10973,PITG_10463,PITG_10461,PITG_12181,PITG_00293,PITG_16666,PITG_12462,PITG_03882,PITG_03220,PITG_09260,PITG_03550,PITG_03344,PITG_15526,PITG_00220,PITG_03472,PITG_12122,PITG_06118,PITG_06475,PITG_19533,PITG_07792,PITG_00910,PITG_13114,PITG_19551,PITG_13528,PITG_01054,PITG_03389,PITG_10881,Novel01178,PITG_00764,PITG_21701,PITG_06589,PITG_23176,PITG_22200,PIT…
GO:0043228	non-membrane-bounded organelle	cellular_component	1.5678e-07	2.1761e-05	343	7076	437	10234	108	PITG_00111,PITG_00078,PITG_22517,PITG_20283,Novel00549,PITG_01814,PITG_07985,PITG_15117,PITG_14252,PITG_11106,PITG_06666,Novel00019,PITG_06856,PITG_05234,Novel01566,Novel01056,PITG_12579,PITG_05922,PITG_00388,PITG_08458,PITG_03043,PITG_15967,PITG_01288,PITG_16446,PITG_03858,Novel01526,PITG_10158,PITG_18540,PITG_04888,PITG_17549,Novel01271,PITG_06612,PITG_00509,Novel00987,Novel01095,Novel00094,PIT…	235	PITG_12723,PITG_17936,PITG_06254,PITG_06450,PITG_20189,PITG_03551,PITG_04487,PITG_09563,PITG_19212,PITG_01997,PITG_13676,PITG_16492,PITG_06322,PITG_02593,PITG_18579,PITG_08834,PITG_15652,PITG_21568,PITG_01535,PITG_03294,PITG_02255,PITG_10193,PITG_03955,PITG_00179,PITG_22323,PITG_07269,PITG_00443,PITG_18052,Novel01541,PITG_06955,PITG_10146,PITG_20116,PITG_05174,PITG_15697,PITG_09424,PITG_03420,PIT…
GO:0043232	intracellular non-membrane-bounded organelle	cellular_component	1.5678e-07	2.1761e-05	343	7076	437	10234	108	Novel01806,Novel01282,PITG_20893,PITG_11652,PITG_01852,PITG_07823,PITG_13968,Novel00747,PITG_01088,Novel00167,PITG_00476,PITG_18463,PITG_18759,PITG_13828,PITG_10165,PITG_19121,PITG_16289,PITG_03701,PITG_10859,PITG_03872,PITG_15625,PITG_03288,PITG_12754,PITG_01154,PITG_01850,PITG_03064,PITG_02343,PITG_08093,PITG_08046,PITG_16652,PITG_07961,PITG_03018,PITG_15078,Novel01881,PITG_06902,PITG_00175,PIT…	235	PITG_12745,PITG_00045,PITG_09345,PITG_15175,PITG_03239,PITG_00156,PITG_15407,PITG_05391,PITG_00226,PITG_11099,PITG_05141,PITG_04843,PITG_00651,PITG_03881,PITG_03178,PITG_05458,PITG_14729,PITG_09270,PITG_14807,PITG_17081,PITG_16735,PITG_15723,PITG_17785,PITG_20264,PITG_18892,PITG_13319,PITG_02054,PITG_21013,PITG_19157,PITG_08959,Novel00841,PITG_08746,PITG_02592,PITG_17348,PITG_13371,PITG_02043,PIT…

## Sheet: Table S7D
Among top 30 GO term, 22 co-existing GO term in RAP, AZD, and RAP+AZD samples
		RAP		AZD		RAP+AZD
Term_type	Description	Number of up-regulated DEGs	Number of down-regulated DEGs	Number of up-regulated DEGs	Number of down-regulated DEGs	Number of up-regulated DEGs	Number of down-regulated DEGs
cellular_component	cell	573	903	433	981	591	1119
cellular_component	cell part	573	903	433	981	591	1119
cellular_component	cellular_component	993	1281	756	1392	1097	1621
cellular_component	cytoplasm	194	421	117	504	150	545
cellular_component	cytoplasmic part	144	242	71	307	93	346
cellular_component	intracellular	533	876	398	958	544	1088
cellular_component	intracellular membrane-bounded organelle	193	369	156	371	204	434
cellular_component	intracellular organelle	334	480	214	548	300	636
cellular_component	intracellular part	428	745	291	843	392	941
cellular_component	macromolecular complex	293	361	138	431	192	492
cellular_component	membrane-bounded organelle	193	369	156	371	204	434
cellular_component	organelle	338	483	218	548	307	637
cellular_component	ribonucleoprotein complex	112	56	16	154	14	175
cellular_component	ribosome	89	28	9	105	8	119
biological_process	cellular amide metabolic process	115	131	17	244	24	270
biological_process	organonitrogen compound biosynthetic process	170	263	49	409	86	442
biological_process	organonitrogen compound metabolic process	198	359	90	491	132	538
biological_process	peptide biosynthetic process	110	116	12	222	16	243
biological_process	peptide metabolic process	111	121	12	229	16	251
biological_process	translation	108	115	11	219	15	240
molecular_function	RNA binding	100	122	20	195	42	214
molecular_function	structural constituent of ribosome	83	26	7	98	6	112
