# Supplementary material for: TOR Inhibitors Synergistically Suppress the Growth and Development of Phytophthora infestans, a Highly Destructive Pathogenic Oomycete
Source: Front Microbiol. 2021 Apr 16;12:596874. doi: 10.3389/fmicb.2021.596874 (PMC8086431; doi:10.3389/fmicb.2021.596874)
Supplement: Supplementary Table 8 — Synergistic DEGs in 10 co-existing GO terms. (A) Overall synergistic DEGs in the 10 co-existing GO terms. Synergistic DEGs in the GO terms of (B) ribonucleoprotein complex, (C) ribosome, (D) cellular amide metabolic process, (E) organonitrogen compound biosynthetic process, (F) organonitrogen compound metabolic process, (G) peptide biosynthetic process, (H) peptide metabolic process, (I) translation, (J) structural constituent of ribosome and (K) RNA binding. [file Table_8.XLSX]

## Sheet: Table S8A
The synergistic DEGs in the 10 co-existed GO terms
GO term	ratio of synergistic DEGs		ratio of synergistic DEGs (down)	ratio of synergistic DEGs (up)
organonitrogen compound metabolic process	0.560942		0.802469	0.197531
organonitrogen compound biosynthetic process	0.55516		0.836538	0.163462
cellular amide metabolic process	0.550162		0.9	0.1
RNA binding	0.538182		0.858108	0.141892
peptide metabolic process	0.537367		0.933775	0.0662252
translation	0.52809		0.929078	0.070922
peptide biosynthetic process	0.525735		0.93007	0.0699301
ribonucleoprotein complex	0.408163		0.85	0.15
structural constituent of ribosome	0.311475		0.868421	0.131579
ribosome	0.310078		0.825	0.175

## Sheet: Table S8B
The synergistic DEGs in the GO terms of ribonucleoprotein complex
				log2FoldChange
Total DEGs in ribonucleoprotein complex			Synergistic DEGs in ribonucleoprotein complex	AZD	RAP	RAP+AZD		ribonucleoprotein complex					down	up
PITG_03117			PITG_19178	-1.534	-0.13326	-3.165		ratio of synergistic DEGs				Number of synergistic DEGs	68	12
PITG_17166			PITG_06596	-1.2658	-0.18773	-2.8435		0.408163				ratio	0.85	0.15
PITG_21503			PITG_18054	-0.9877	-0.15493	-2.5731
Novel01230			PITG_03768	-1.0332	-0.22317	-2.5447
PITG_07306			PITG_08548	-1.3863	-0.39198	-2.4312
PITG_12932			PITG_09525	-1.2178	-0.24398	-2.3598
PITG_04337			PITG_06482	-1.1719	-0.56119	-2.3223
PITG_03660			PITG_09521	-0.96955	0	-2.3156
PITG_03040			PITG_17785	-1.2918	-0.6026	-2.3098
Novel00167			PITG_22023	-0.90289	0	-2.2822
PITG_19121			PITG_12193	-0.99172	-0.27516	-2.2273
Novel01095			PITG_02467	-0.91716	-0.29913	-2.2223
PITG_00388			PITG_14729	-1.2669	0	-2.208
Novel00695			PITG_20798	-1.1589	-0.49495	-2.1841
PITG_16446			PITG_03420	-1.2542	-0.17443	-2.1718
PITG_15089			PITG_00523	-1.1632	-0.34026	-2.159
Novel01526			PITG_10827	-0.5424	-0.38181	-2.1519
PITG_01925			PITG_03993	-0.92775	-0.1943	-2.1495
Novel01157			PITG_09631	-0.88021	-0.27741	-2.1393
Novel00179			PITG_20116	-0.70509	0	-2.1278
PITG_05680			PITG_06636	-0.82566	-0.31728	-2.083
PITG_19531			PITG_19157	-0.8198	-0.54308	-2.0455
PITG_12745			PITG_05666	-0.95874	-0.30716	-2.0129
PITG_05630			PITG_19531	-0.86799	-0.39807	-2.003
PITG_15407			PITG_14608	-1.1228	-0.32652	-1.988
PITG_09442			Novel00643	-0.37397	0	-1.9721
PITG_17261			PITG_05174	-1.0871	-0.32161	-1.9526
PITG_03239			PITG_04382	-0.92557	-0.2457	-1.8597
PITG_09345			PITG_19551	-1.0484	-0.38596	-1.8587
PITG_18862			PITG_09627	-0.95503	-0.38538	-1.8208
PITG_01042			PITG_17240	-0.98526	-0.27186	-1.8079
PITG_04843			PITG_01217	-0.57408	0	-1.8031
PITG_11923			PITG_12697	-0.9168	-0.4886	-1.7577
PITG_11099			PITG_09506	-0.73227	-0.14804	-1.6866
Novel01297			PITG_19448	-0.86568	-0.32929	-1.6664
PITG_03818			PITG_04487	-0.97611	0	-1.6543
PITG_10827			PITG_09555	-0.22447	0	-1.5175
PITG_03178			PITG_17733	-1.1471	0	-1.4783
PITG_01246			PITG_23192	-0.89376	-0.21903	-1.3952
PITG_06482			PITG_20264	-0.33591	0	-1.3727
PITG_06995			PITG_11923	-0.64229	-0.23256	-1.3263
PITG_04382			PITG_19007	-0.67136	-0.29684	-1.2805
PITG_05009			PITG_13600	-0.95148	-0.18207	-1.2595
PITG_20688			PITG_02736	-0.58086	-0.72352	-1.1932
PITG_14729			PITG_12839	-0.70264	0	-1.1057
PITG_23192			PITG_10725	0	0	-1.0799
PITG_05171			PITG_13905	-0.39405	0	-1.0746
PITG_07327			PITG_18862	-0.42471	-0.26528	-1.0647
PITG_22135			PITG_02476	-0.65332	-0.36651	-1.0578
PITG_01171			PITG_03916	-0.50097	0	-1.0182
PITG_17785			PITG_20904	-0.35381	0	-0.95223
PITG_03956			PITG_01246	-0.6108	-0.22505	-0.95102
PITG_03762			PITG_01171	0	-0.55117	-0.92656
PITG_15723			PITG_11734	-0.61828	-0.37503	-0.90332
PITG_19999			PITG_17072	-0.22828	-0.28162	-0.88962
PITG_03221			PITG_15653	-0.71785	-0.16903	-0.87403
PITG_22264			PITG_14575	-0.67009	-0.203	-0.84575
PITG_02476			PITG_14854	-0.38799	-0.55796	-0.83604
PITG_03300			PITG_05006	-0.45563	-0.45356	-0.74163
PITG_20264			PITG_18752	-0.41487	0	-0.73081
PITG_06771			PITG_02996	0	0	-0.58723
PITG_09506			PITG_10969	-0.39242	-0.41711	-0.58713
PITG_01041			PITG_17727	0	0	-0.36567
PITG_02467			PITG_13972	0	0	-0.35954
PITG_13312			PITG_10871	-0.22343	0	-0.3546
PITG_20904			PITG_09488	-0.22634	-0.21632	-0.34888
PITG_05006			PITG_03300	0	0	-0.27178
PITG_10482			PITG_01781	-0.20814	0	-0.24083
Novel00841			PITG_16446	0.30238	0.1882	0.33173
PITG_19157			Novel00695	0.18656	0.16996	0.44332
PITG_08959			PITG_00388	0.2722	0	0.44661
PITG_20798			PITG_01925	0	0	0.47942
PITG_01217			Novel00179	0.33928	0.27167	0.51611
PITG_00266			PITG_15089	0.27335	0	0.89833
PITG_03768			PITG_03660	0.48466	0.81469	1.0347
PITG_00631			Novel01157	0.49607	1.1041	1.3414
PITG_18717			PITG_05680	0.48008	0.46389	1.3666
PITG_07173			PITG_19121	0.28971	0	1.4402
PITG_06799			Novel01526	0.3788	0.3289	1.6142
PITG_02053			Novel01095	0.73911	1.2883	1.7604
PITG_14575
PITG_12947
PITG_09525
PITG_12931
PITG_02694
PITG_09627
PITG_13972
PITG_13371
PITG_18752
PITG_02592
PITG_05666
PITG_15090
PITG_13500
PITG_17093
PITG_10202
Novel00373
PITG_10725
PITG_09540
PITG_19178
PITG_10871
PITG_06262
PITG_12292
Novel00015
PITG_15069
PITG_11734
PITG_06263
PITG_09521
PITG_15697
PITG_05174
PITG_03420
PITG_14850
PITG_13600
PITG_10863
PITG_07055
PITG_13681
PITG_14913
PITG_10887
PITG_01833
PITG_16008
PITG_20188
PITG_03235
PITG_05512
PITG_06596
PITG_04334
PITG_15638
PITG_12697
PITG_17072
PITG_02578
PITG_16198
PITG_19448
PITG_10263
PITG_01943
PITG_06636
PITG_09552
PITG_09555
PITG_17733
PITG_19007
PITG_13905
PITG_03353
PITG_08703
PITG_16757
PITG_09631
PITG_00941
PITG_14854
PITG_12839
PITG_03486
PITG_17240
PITG_20189
PITG_04487
PITG_01019
PITG_12305
PITG_09563
PITG_19608
PITG_11766
PITG_11417
PITG_18054
PITG_02736
PITG_02593
PITG_03916
PITG_03477
PITG_09488
PITG_13676
PITG_19280
PITG_08834
PITG_15653
PITG_20795
PITG_07300
PITG_12193
PITG_08548
PITG_17727
PITG_10193
PITG_08809
PITG_15652
PITG_17365
PITG_01922
PITG_14608
PITG_03294
PITG_10969
PITG_19669
PITG_00179
Novel00643
PITG_06237
PITG_04395
PITG_01781
PITG_07269
PITG_00523
PITG_00443
PITG_22323
PITG_22023
PITG_02996
PITG_03993
PITG_20116
PITG_14730
PITG_19551
PITG_18052
PITG_10146

## Sheet: Table S8C
The synergistic DEGs in the GO terms of ribosome
				log2FoldChange
Total DEGs in ribosome			Synergistic DEGs in ribosome	AZD	RAP	RAP+AZD		ribosome					down	up
PITG_21503			PITG_06596	-1.2658	-0.18773	-2.8435		ratio of synergistic DEGs				Number of synergistic DEGs	33	7
Novel01230			PITG_18054	-0.9877	-0.15493	-2.5731		0.310078				ratio	0.825	0.175
PITG_04337			PITG_03768	-1.0332	-0.22317	-2.5447
PITG_00388			PITG_08548	-1.3863	-0.39198	-2.4312
PITG_15089			PITG_09525	-1.2178	-0.24398	-2.3598
PITG_16446			PITG_09521	-0.96955	0	-2.3156
PITG_19121			PITG_17785	-1.2918	-0.6026	-2.3098
Novel01157			PITG_12193	-0.99172	-0.27516	-2.2273
Novel01095			PITG_14729	-1.2669	0	-2.208
Novel00167			PITG_20798	-1.1589	-0.49495	-2.1841
PITG_10863			PITG_03420	-1.2542	-0.17443	-2.1718
PITG_07055			PITG_00523	-1.1632	-0.34026	-2.159
PITG_04843			PITG_09631	-0.88021	-0.27741	-2.1393
PITG_01042			PITG_20116	-0.70509	0	-2.1278
PITG_10887			PITG_06636	-0.82566	-0.31728	-2.083
PITG_16008			PITG_19157	-0.8198	-0.54308	-2.0455
PITG_01833			PITG_19531	-0.86799	-0.39807	-2.003
PITG_13681			PITG_14608	-1.1228	-0.32652	-1.988
PITG_11923			PITG_05174	-1.0871	-0.32161	-1.9526
Novel01297			PITG_04382	-0.92557	-0.2457	-1.8597
PITG_14913			PITG_09627	-0.95503	-0.38538	-1.8208
PITG_11099			PITG_01217	-0.57408	0	-1.8031
PITG_20188			PITG_12697	-0.9168	-0.4886	-1.7577
PITG_03178			PITG_09506	-0.73227	-0.14804	-1.6866
PITG_06995			PITG_19448	-0.86568	-0.32929	-1.6664
PITG_03235			PITG_04487	-0.97611	0	-1.6543
PITG_04334			PITG_09555	-0.22447	0	-1.5175
PITG_05009			PITG_20264	-0.33591	0	-1.3727
PITG_15638			PITG_11923	-0.64229	-0.23256	-1.3263
PITG_06596			PITG_19007	-0.67136	-0.29684	-1.2805
PITG_04382			PITG_12839	-0.70264	0	-1.1057
PITG_09521			PITG_03916	-0.50097	0	-1.0182
PITG_19531			PITG_11734	-0.61828	-0.37503	-0.90332
PITG_15697			PITG_16446	0.30238	0.1882	0.33173
PITG_12745			PITG_00388	0.2722	0	0.44661
PITG_05174			PITG_15089	0.27335	0	0.89833
PITG_17261			PITG_03660	0.48466	0.81469	1.0347
PITG_03239			Novel01157	0.49607	1.1041	1.3414
PITG_09442			PITG_19121	0.28971	0	1.4402
PITG_15407			Novel01095	0.73911	1.2883	1.7604
PITG_09345
PITG_14850
PITG_03420
PITG_09555
PITG_06636
PITG_09552
PITG_19007
PITG_08703
PITG_03353
PITG_15723
PITG_19999
PITG_03762
PITG_17785
PITG_09631
PITG_22264
PITG_03221
PITG_16757
PITG_20688
PITG_16198
PITG_19448
PITG_12697
PITG_02578
PITG_14729
PITG_10263
PITG_05171
PITG_22135
PITG_01943
PITG_03916
Novel00841
PITG_18054
PITG_13676
PITG_01217
PITG_19280
PITG_20798
PITG_19157
PITG_08959
PITG_03477
PITG_07300
PITG_20795
PITG_03768
PITG_00631
PITG_00266
PITG_08834
PITG_12947
PITG_08548
PITG_06799
PITG_07173
PITG_02053
PITG_12193
PITG_12839
PITG_00941
PITG_09506
PITG_20264
PITG_06771
PITG_03486
PITG_01041
PITG_13312
PITG_09563
PITG_20189
PITG_04487
PITG_11766
PITG_19608
PITG_00443
PITG_09540
PITG_07269
PITG_00523
PITG_22323
Novel00015
PITG_20116
PITG_10146
PITG_18052
PITG_15069
PITG_11734
PITG_08809
PITG_10193
PITG_02694
PITG_09627
PITG_09525
PITG_03294
PITG_01922
PITG_13371
PITG_14608
PITG_19669
PITG_17093
PITG_13500
PITG_15090
PITG_10202
PITG_06237
PITG_00179

## Sheet: Table S8D
The synergistic DEGs in the GO terms of cellular amide metabolic process
				log2FoldChange
Total DEGs in cellular amide metabolic process			Synergistic DEGs in cellular amide metabolic process	AZD	RAP	RAP+AZD		cellular amide metabolic process					down	up
Novel01571			PITG_22657	-1.6992	-0.96753	-5.7348		ratio of synergistic DEGs				Number of synergistic DEGs	153	17
PITG_03597			PITG_14352	-1.4781	0	-4.3323		0.550162				ratio	0.9	0.1
PITG_10167			PITG_19399	-1.7555	0	-3.67
PITG_04337			PITG_18545	-1.7813	0	-3.5033
PITG_16457			PITG_12483	-1.2917	-0.42801	-3.3137
PITG_10516			PITG_08714	-1.2619	-0.88598	-3.2316
PITG_19780			PITG_09289	-1.2027	0	-3.0527
PITG_21503			PITG_21661	-1.0515	0	-2.9639
PITG_04747			PITG_15810	-1.5158	-0.97845	-2.8702
PITG_03093			PITG_06596	-1.2658	-0.18773	-2.8435
PITG_22715			PITG_04640	-1.2968	-0.45835	-2.8183
Novel00981			PITG_17607	-1.1313	-0.82207	-2.8034
PITG_19679			PITG_06722	-1.1361	-0.32418	-2.7202
PITG_18882			PITG_11110	-1.1459	-0.32197	-2.7137
Novel01230			PITG_10110	-0.64546	-1.2793	-2.6635
PITG_15417			PITG_21393	-1.3358	-0.703	-2.6271
PITG_03660			PITG_18054	-0.9877	-0.15493	-2.5731
PITG_17651			PITG_20689	-1.0841	-0.18083	-2.5491
PITG_11728			PITG_03768	-1.0332	-0.22317	-2.5447
PITG_11468			PITG_10916	-1.095	-0.18977	-2.5358
Novel01095			PITG_16915	-1.0946	-0.11743	-2.5053
PITG_10138			PITG_00397	-1.1807	-0.18108	-2.46
Novel00922			PITG_08548	-1.3863	-0.39198	-2.4312
PITG_16088			PITG_02039	-0.92228	-0.33696	-2.4118
Novel00907			PITG_09525	-1.2178	-0.24398	-2.3598
PITG_00388			PITG_00910	-1.1313	-0.36958	-2.328
PITG_00401			PITG_06482	-1.1719	-0.56119	-2.3223
PITG_00578			PITG_09521	-0.96955	0	-2.3156
PITG_17009			PITG_17785	-1.2918	-0.6026	-2.3098
PITG_04708			PITG_06821	-1.0503	0	-2.2649
Novel00167			PITG_10941	-1.0571	-0.30619	-2.2292
PITG_19121			PITG_12193	-0.99172	-0.27516	-2.2273
PITG_15831			PITG_06454	-0.77843	-0.99581	-2.2154
PITG_06911			PITG_14729	-1.2669	0	-2.208
PITG_14577			PITG_20798	-1.1589	-0.49495	-2.1841
PITG_11630			PITG_03420	-1.2542	-0.17443	-2.1718
Novel01089			PITG_00523	-1.1632	-0.34026	-2.159
Novel01157			PITG_13399	-0.81993	-0.44855	-2.1521
PITG_01065			PITG_03993	-0.92775	-0.1943	-2.1495
PITG_19531			PITG_09631	-0.88021	-0.27741	-2.1393
PITG_09442			PITG_20116	-0.70509	0	-2.1278
PITG_20689			PITG_13831	-0.91553	-0.56582	-2.0947
PITG_17261			PITG_00302	-1.0358	-0.50621	-2.0847
PITG_00757			PITG_06636	-0.82566	-0.31728	-2.083
PITG_21010			PITG_18018	-0.91946	-0.45906	-2.0647
PITG_09791			PITG_19157	-0.8198	-0.54308	-2.0455
PITG_01042			PITG_03460	-0.90313	-0.53661	-2.0425
Novel01297			PITG_21886	-0.91313	-0.13918	-2.0217
PITG_11923			PITG_03661	-1.0768	-0.48564	-2.0065
PITG_06995			PITG_19531	-0.86799	-0.39807	-2.003
PITG_04382			PITG_21010	-1.0674	-0.27182	-1.9891
PITG_18251			PITG_14608	-1.1228	-0.32652	-1.988
PITG_05009			PITG_13174	-0.89001	-0.49246	-1.9582
PITG_14278			PITG_05174	-1.0871	-0.32161	-1.9526
PITG_00302			PITG_20386	-0.95635	-0.10644	-1.9099
PITG_03274			PITG_04683	-0.786	0	-1.8716
PITG_07141			PITG_04382	-0.92557	-0.2457	-1.8597
PITG_07234			PITG_19551	-1.0484	-0.38596	-1.8587
PITG_09846			PITG_08100	-0.88358	0	-1.8334
PITG_13735			PITG_08579	-0.86591	-0.3614	-1.8248
PITG_08206			PITG_09627	-0.95503	-0.38538	-1.8208
PITG_05171			PITG_17240	-0.98526	-0.27186	-1.8079
PITG_14557			PITG_06819	-0.85782	-0.23245	-1.8036
PITG_22135			PITG_01217	-0.57408	0	-1.8031
PITG_05694			PITG_12697	-0.9168	-0.4886	-1.7577
PITG_05733			PITG_09234	-0.74214	-0.4484	-1.7413
PITG_13596			PITG_07141	-0.78385	-0.61108	-1.7312
PITG_12077			PITG_09932	-0.7775	-0.36378	-1.7247
PITG_03398			PITG_18518	-0.64976	-0.49144	-1.7063
PITG_03762			PITG_09506	-0.73227	-0.14804	-1.6866
PITG_19999			PITG_04992	-0.68161	-0.54612	-1.6697
PITG_06454			PITG_19448	-0.86568	-0.32929	-1.6664
PITG_03221			PITG_04487	-0.97611	0	-1.6543
PITG_09932			PITG_01184	-0.81998	-0.26479	-1.6435
PITG_22020			PITG_07885	-0.79609	-0.27465	-1.5433
PITG_00397			PITG_12535	-0.48442	0	-1.5366
PITG_08681			PITG_09555	-0.22447	0	-1.5175
PITG_01041			PITG_17733	-1.1471	0	-1.4783
PITG_09506			PITG_05628	-0.38117	-0.22428	-1.4779
PITG_06771			PITG_04703	0	0	-1.4467
PITG_09234			PITG_15393	-0.93412	0	-1.424
PITG_18545			PITG_15566	-0.86299	0	-1.4125
PITG_17929			PITG_06222	-0.97682	-0.58309	-1.4098
PITG_04918			PITG_05301	-0.8723	-0.25151	-1.3911
PITG_20798			PITG_20264	-0.33591	0	-1.3727
PITG_01217			PITG_07888	-0.54765	-0.42945	-1.3691
PITG_16741			PITG_01255	-1.1785	0	-1.3655
PITG_00631			PITG_01762	-0.58006	-0.4974	-1.3627
PITG_03768			PITG_03915	-0.66629	-0.61865	-1.3601
PITG_07173			PITG_07797	-1.0129	-0.41747	-1.3564
PITG_16937			PITG_12864	-0.7031	-0.3715	-1.3547
PITG_06799			PITG_21071	-0.68666	-0.5533	-1.3514
PITG_02053			PITG_11923	-0.64229	-0.23256	-1.3263
PITG_15566			PITG_08206	-0.38881	0	-1.3171
PITG_12947			PITG_14456	-0.21598	-0.49551	-1.2961
PITG_05058			PITG_07841	-0.56005	-0.32883	-1.2942
PITG_03978			PITG_19007	-0.67136	-0.29684	-1.2805
PITG_09525			PITG_17748	-0.72633	-0.5575	-1.2766
PITG_09627			PITG_03322	-0.5176	-0.38046	-1.2652
PITG_16556			PITG_13600	-0.95148	-0.18207	-1.2595
PITG_14352			PITG_10974	-0.614	0	-1.2499
PITG_02694			PITG_11111	-0.70777	-0.3881	-1.2312
PITG_00754			PITG_20747	-0.59743	-0.37492	-1.2105
PITG_17205			PITG_05649	-0.51232	-0.2474	-1.1906
PITG_20386			PITG_01036	-0.61375	-0.31506	-1.1631
PITG_08714			PITG_04918	-0.69176	-0.5114	-1.1455
PITG_09540			PITG_07839	-0.58883	-0.62268	-1.1373
PITG_14456			PITG_08369	-0.56429	-0.50663	-1.1361
PITG_12483			PITG_07062	-0.54153	0	-1.1163
PITG_21886			PITG_12839	-0.70264	0	-1.1057
PITG_11734			PITG_05405	-0.73707	-0.12563	-1.0903
PITG_15069			PITG_12961	-0.58518	-0.46856	-1.0755
PITG_15697			PITG_03274	-0.31637	0	-1.0278
PITG_05174			PITG_03916	-0.50097	0	-1.0182
PITG_11110			PITG_14609	-0.49563	0	-1.004
PITG_08100			PITG_02580	-0.48899	-0.30653	-0.99785
PITG_06722			PITG_05685	-0.4366	-0.64062	-0.97934
PITG_14850			PITG_10480	-0.60067	-0.22118	-0.96636
PITG_03420			PITG_05007	-0.53463	-0.49427	-0.93455
PITG_13399			PITG_03681	-0.72486	-0.45718	-0.93357
PITG_16023			PITG_00754	0	0	-0.92261
PITG_13600			PITG_13596	-0.50241	-0.64225	-0.91833
PITG_14596			PITG_11734	-0.61828	-0.37503	-0.90332
PITG_10863			PITG_09846	-0.71201	-0.33624	-0.8988
PITG_13681			PITG_16937	-0.65401	-0.18432	-0.8899
PITG_13831			PITG_17929	-0.18498	-0.1984	-0.85979
PITG_10139			PITG_14083	-0.49737	-0.72094	-0.85658
PITG_16008			PITG_06440	-0.57598	-0.30852	-0.85579
PITG_02992			PITG_13735	0	-0.46456	-0.85287
PITG_18018			PITG_16669	-0.2869	0	-0.83773
PITG_20188			PITG_16328	-0.51657	-0.2874	-0.83672
PITG_01762			PITG_16023	-0.24365	-0.41116	-0.83655
PITG_09289			PITG_18251	0	0	-0.81945
PITG_16669			PITG_13427	-0.37195	-0.14605	-0.81118
PITG_04703			PITG_14668	0	0	-0.79753
PITG_19448			PITG_16741	-0.58419	-0.17087	-0.79262
PITG_02039			PITG_10979	-0.34144	0	-0.78455
PITG_10263			Novel00866	0	0	-0.76289
PITG_06821			PITG_12151	-0.44308	-0.36927	-0.75668
PITG_01943			PITG_14278	-0.42632	-0.33942	-0.73901
PITG_01184			PITG_05733	-0.34588	0	-0.70022
PITG_09552			PITG_05354	-0.23142	0	-0.69225
PITG_10480			PITG_03799	-0.32848	0	-0.67693
PITG_06636			PITG_10139	0	-0.39814	-0.64741
PITG_01580			PITG_00757	-0.42121	0	-0.63305
PITG_19007			PITG_14557	-0.43061	-0.51971	-0.61854
PITG_16757			PITG_09791	-0.4731	-0.4012	-0.60692
PITG_09631			PITG_12942	0	0	-0.59417
PITG_10979			PITG_01580	-0.33155	-0.20362	-0.5662
PITG_04640			PITG_06505	0	0	-0.53696
PITG_05405			PITG_01756	-0.19698	0	-0.53357
PITG_17240			PITG_17727	0	0	-0.36567
PITG_04487			PITG_10519	0	0	-0.34645
PITG_20189			PITG_14577	0	0	0.3078
PITG_09563			PITG_16088	0	0	0.38909
PITG_10519			PITG_00388	0.2722	0	0.44661
PITG_09866			PITG_15831	0	0	0.4613
PITG_12942			PITG_15417	0	0.41257	0.54315
PITG_14668			PITG_11468	0	0	0.91298
PITG_13676			PITG_03660	0.48466	0.81469	1.0347
PITG_00543			Novel01157	0.49607	1.1041	1.3414
PITG_08834			PITG_17009	0.27305	0.33139	1.4043
PITG_05301			PITG_19121	0.28971	0	1.4402
PITG_04992			PITG_17651	0	0	1.4785
PITG_17727			PITG_01065	0.91032	0	1.5197
PITG_10193			Novel01095	0.73911	1.2883	1.7604
PITG_05354			PITG_00578	1.5947	0.32485	1.9556
PITG_06505			Novel00907	1.2719	0	2.9959
PITG_21661			Novel01089	0	0	3.2663
PITG_03294			PITG_10138	1.5288	0	3.6311
PITG_08669
PITG_10974
PITG_00179
PITG_21393
PITG_01255
PITG_07269
PITG_17748
PITG_00443
PITG_03799
PITG_22323
PITG_20116
PITG_03460
PITG_03993
PITG_18052
PITG_03681
PITG_16328
PITG_10146
PITG_12745
PITG_15407
PITG_15393
PITG_03239
PITG_14083
PITG_00636
PITG_09345
PITG_08579
PITG_13607
PITG_17153
PITG_04843
PITG_12151
PITG_11099
PITG_07888
PITG_05007
PITG_11111
PITG_03178
PITG_06482
PITG_04683
PITG_14729
PITG_02547
PITG_06222
PITG_08955
PITG_07885
PITG_03956
PITG_17785
PITG_15723
PITG_13427
PITG_03322
PITG_05781
PITG_20264
PITG_14044
PITG_17607
Novel00841
PITG_02580
PITG_08959
PITG_19157
PITG_04774
PITG_02921
PITG_06048
PITG_03915
PITG_13174
PITG_03712
PITG_13371
PITG_03661
PITG_01756
PITG_16915
PITG_15090
PITG_12524
PITG_07797
PITG_13500
PITG_17093
PITG_10202
PITG_05649
PITG_10916
PITG_07991
PITG_03802
Novel00015
PITG_05628
PITG_06440
PITG_09521
PITG_15810
PITG_19399
PITG_22657
PITG_14913
PITG_07841
PITG_10887
PITG_01833
PITG_03480
PITG_03235
PITG_03999
PITG_06596
PITG_12535
PITG_15638
PITG_12864
PITG_04334
PITG_02578
PITG_12697
PITG_16198
PITG_11560
PITG_10110
PITG_04729
PITG_08129
PITG_17733
PITG_09555
PITG_07062
PITG_08703
PITG_08369
PITG_03353
PITG_00941
PITG_12839
PITG_10941
PITG_00177
PITG_03486
PITG_11766
PITG_18054
PITG_03916
PITG_06819
PITG_19280
Novel00866
PITG_21071
PITG_22572
PITG_20795
PITG_07300
PITG_12193
PITG_08548
PITG_12961
PITG_00910
PITG_08809
PITG_01922
PITG_14608
PITG_05685
PITG_14609
PITG_18518
PITG_19669
PITG_06237
PITG_03399
PITG_00523
PITG_07839
PITG_01036
PITG_19551
PITG_20747

## Sheet: Table S8E
The synergistic DEGs in the GO terms of organonitrogen compound biosynthetic process
				log2FoldChange
Total DEGs in organonitrogen compound biosynthetic process			Synergistic DEGs in organonitrogen compound biosynthetic process	AZD	RAP	RAP+AZD		organonitrogen compound biosynthetic process							down	up
Novel01218			PITG_22657	-1.6992	-0.96753	-5.7348		ratio of synergistic DEGs						Number of synergistic DEGs	261	51
Novel01524			PITG_19656	-2.041	-0.17275	-5.4393		0.55516						ratio	0.836538	0.163462
PITG_14920			PITG_19993	-1.9874	0	-4.8699
PITG_16480			PITG_17608	-1.5446	0	-4.654
Novel01571			PITG_14352	-1.4781	0	-4.3323
PITG_03597			PITG_19399	-1.7555	0	-3.67
PITG_14808			PITG_18545	-1.7813	0	-3.5033
PITG_10167			PITG_14639	-2.1748	-0.53264	-3.3433
PITG_04337			PITG_12483	-1.2917	-0.42801	-3.3137
PITG_14216			PITG_08714	-1.2619	-0.88598	-3.2316
PITG_05537			PITG_00571	-1.5638	-0.37525	-3.1088
PITG_01188			PITG_09289	-1.2027	0	-3.0527
PITG_11178			PITG_22685	-1.9131	-1.8988	-2.9856
PITG_00257			PITG_12300	-1.7225	-0.32535	-2.976
PITG_10077			PITG_21661	-1.0515	0	-2.9639
PITG_08022			PITG_02925	-2.461	-2.2666	-2.9061
PITG_16457			PITG_15810	-1.5158	-0.97845	-2.8702
PITG_10516			PITG_06596	-1.2658	-0.18773	-2.8435
PITG_10301			PITG_04640	-1.2968	-0.45835	-2.8183
PITG_19780			PITG_05377	-1.4032	-0.47691	-2.8044
PITG_04747			PITG_17607	-1.1313	-0.82207	-2.8034
PITG_21503			PITG_09582	-0.73745	0	-2.7804
PITG_17919			PITG_06722	-1.1361	-0.32418	-2.7202
Novel01371			PITG_11110	-1.1459	-0.32197	-2.7137
PITG_22715			PITG_10110	-0.64546	-1.2793	-2.6635
PITG_03093			PITG_21393	-1.3358	-0.703	-2.6271
PITG_19679			PITG_16736	-1.0478	-0.43737	-2.6255
PITG_16280			PITG_18054	-0.9877	-0.15493	-2.5731
PITG_15694			PITG_20689	-1.0841	-0.18083	-2.5491
PITG_08810			PITG_03768	-1.0332	-0.22317	-2.5447
PITG_10595			PITG_10916	-1.095	-0.18977	-2.5358
PITG_18882			PITG_17983	-1.4536	-0.26575	-2.5344
Novel01230			PITG_16915	-1.0946	-0.11743	-2.5053
PITG_10601			PITG_13924	-1.1819	0	-2.5045
PITG_00388			PITG_04441	-2.1211	-1.5358	-2.4655
PITG_11085			PITG_00397	-1.1807	-0.18108	-2.46
PITG_02358			PITG_12727	-1.3256	-0.65998	-2.4361
Novel00907			PITG_08548	-1.3863	-0.39198	-2.4312
PITG_16088			PITG_02039	-0.92228	-0.33696	-2.4118
PITG_14634			PITG_09525	-1.2178	-0.24398	-2.3598
PITG_04715			PITG_02740	-1.7124	-1.483	-2.3306
PITG_00401			PITG_00910	-1.1313	-0.36958	-2.328
PITG_02973			PITG_06482	-1.1719	-0.56119	-2.3223
PITG_12121			PITG_09521	-0.96955	0	-2.3156
PITG_21021			PITG_17785	-1.2918	-0.6026	-2.3098
PITG_18188			PITG_22112	-1.1422	0	-2.3047
PITG_13604			Novel00116	0	0	-2.3028
Novel00351			PITG_06821	-1.0503	0	-2.2649
PITG_13613			PITG_21022	-1.6882	-0.69665	-2.257
PITG_12940			PITG_13265	-0.88625	-0.45356	-2.243
PITG_17651			PITG_20759	-1.0876	-0.88431	-2.242
PITG_02750			PITG_10941	-1.0571	-0.30619	-2.2292
PITG_02354			PITG_12193	-0.99172	-0.27516	-2.2273
PITG_02363			PITG_06454	-0.77843	-0.99581	-2.2154
Novel01095			PITG_14729	-1.2669	0	-2.208
PITG_11468			PITG_09726	-0.93135	-0.35268	-2.2073
PITG_02362			PITG_00074	-0.86846	-0.59105	-2.1928
PITG_02357			PITG_20798	-1.1589	-0.49495	-2.1841
PITG_02353			PITG_03420	-1.2542	-0.17443	-2.1718
PITG_06672			PITG_00523	-1.1632	-0.34026	-2.159
PITG_02361			PITG_13399	-0.81993	-0.44855	-2.1521
PITG_14577			PITG_03993	-0.92775	-0.1943	-2.1495
PITG_06911			PITG_09631	-0.88021	-0.27741	-2.1393
PITG_05953			PITG_14936	-0.59239	-0.61315	-2.1368
Novel01157			PITG_20116	-0.70509	0	-2.1278
Novel01089			PITG_13831	-0.91553	-0.56582	-2.0947
PITG_15267			PITG_00302	-1.0358	-0.50621	-2.0847
PITG_09387			PITG_06636	-0.82566	-0.31728	-2.083
PITG_01955			PITG_18018	-0.91946	-0.45906	-2.0647
PITG_17993			PITG_19157	-0.8198	-0.54308	-2.0455
PITG_15629			PITG_03460	-0.90313	-0.53661	-2.0425
Novel00046			PITG_21886	-0.91313	-0.13918	-2.0217
PITG_13395			PITG_03661	-1.0768	-0.48564	-2.0065
PITG_16061			PITG_19531	-0.86799	-0.39807	-2.003
Novel00400			PITG_21010	-1.0674	-0.27182	-1.9891
PITG_17009			PITG_14608	-1.1228	-0.32652	-1.988
PITG_02352			PITG_13174	-0.89001	-0.49246	-1.9582
PITG_13030			PITG_05174	-1.0871	-0.32161	-1.9526
PITG_17604			PITG_00163	-1.1286	-0.90685	-1.9504
Novel00819			PITG_20386	-0.95635	-0.10644	-1.9099
PITG_06147			PITG_00765	-0.70065	-0.64756	-1.8955
PITG_11393			PITG_04683	-0.786	0	-1.8716
PITG_02050			PITG_05363	-1.702	0	-1.8646
PITG_21619			PITG_04382	-0.92557	-0.2457	-1.8597
PITG_02210			PITG_19551	-1.0484	-0.38596	-1.8587
PITG_02355			PITG_15526	-0.51876	-0.55753	-1.8376
PITG_20192			PITG_08100	-0.88358	0	-1.8334
PITG_00211			PITG_08579	-0.86591	-0.3614	-1.8248
PITG_16016			PITG_09627	-0.95503	-0.38538	-1.8208
PITG_03427			PITG_09547	-0.93505	0	-1.8126
Novel00146			PITG_02663	-0.8075	-0.23004	-1.8092
PITG_22391			PITG_17240	-0.98526	-0.27186	-1.8079
PITG_03660			PITG_19096	-0.77784	0	-1.8051
PITG_15139			PITG_06819	-0.85782	-0.23245	-1.8036
PITG_00471			PITG_01217	-0.57408	0	-1.8031
PITG_15417			PITG_09640	-1.31	0	-1.798
PITG_07943			PITG_04601	-0.67374	-0.2154	-1.7956
PITG_11728			PITG_01769	-0.73841	-0.14298	-1.7929
PITG_03291			Novel00345	-1.038	0	-1.7731
PITG_02364			PITG_07792	-0.57344	-0.57264	-1.7693
Novel00922			PITG_12264	-0.9942	-0.34827	-1.7674
Novel01596			PITG_12697	-0.9168	-0.4886	-1.7577
PITG_05522			PITG_01245	-0.60611	-0.37975	-1.7545
PITG_02360			PITG_10089	-0.45093	-0.33681	-1.7417
PITG_02359			PITG_09234	-0.74214	-0.4484	-1.7413
PITG_11630			PITG_09576	-0.98176	-0.24242	-1.7338
PITG_22313			PITG_07141	-0.78385	-0.61108	-1.7312
PITG_09273			PITG_09932	-0.7775	-0.36378	-1.7247
PITG_00430			PITG_18518	-0.64976	-0.49144	-1.7063
PITG_01065			PITG_01768	-0.8311	-1.0487	-1.7035
PITG_02356			PITG_09506	-0.73227	-0.14804	-1.6866
PITG_01761			PITG_04992	-0.68161	-0.54612	-1.6697
PITG_03740			PITG_03620	-0.84441	-0.69715	-1.6686
PITG_04708			PITG_19448	-0.86568	-0.32929	-1.6664
PITG_19121			PITG_06595	-0.66568	-0.53541	-1.6639
PITG_19147			PITG_04487	-0.97611	0	-1.6543
Novel00167			PITG_08808	-0.63885	-0.95092	-1.6524
PITG_15831			PITG_01184	-0.81998	-0.26479	-1.6435
PITG_13135			PITG_09282	-0.47478	-0.34121	-1.6164
PITG_07866			PITG_17786	-0.94349	-0.96991	-1.6162
PITG_09289			PITG_20965	-0.60403	-0.43157	-1.6126
PITG_01762			PITG_12930	-0.52525	-0.26833	-1.5476
PITG_02992			PITG_07885	-0.79609	-0.27465	-1.5433
PITG_20188			PITG_11225	-0.59258	-0.21944	-1.5385
PITG_18018			PITG_12535	-0.48442	0	-1.5366
PITG_13831			PITG_06267	-0.45143	-0.29381	-1.5312
PITG_03632			PITG_13586	-0.78505	0	-1.5254
PITG_13600			PITG_13176	-0.76734	-0.21246	-1.5225
PITG_16023			PITG_09555	-0.22447	0	-1.5175
PITG_14596			PITG_04618	-0.57228	-1.468	-1.5045
PITG_10863			PITG_00566	-0.70127	-0.45132	-1.4947
PITG_14850			PITG_12053	-0.41354	-0.28677	-1.4887
PITG_01297			PITG_17733	-1.1471	0	-1.4783
PITG_02663			PITG_10007	-0.63013	0	-1.4715
PITG_13586			PITG_09553	-0.57375	-0.27122	-1.4676
PITG_03295			PITG_17790	-0.56779	-0.27448	-1.4514
PITG_15697			PITG_09635	-0.73383	-0.51897	-1.45
PITG_17133			PITG_04703	0	0	-1.4467
PITG_16757			PITG_04698	-0.70507	-0.51319	-1.4446
PITG_09631			PITG_17925	-0.82309	-0.67313	-1.4438
PITG_16736			PITG_00133	-0.5995	-0.35811	-1.4325
PITG_19007			PITG_15393	-0.93412	0	-1.424
PITG_09552			PITG_01711	-0.97068	-0.49331	-1.4235
PITG_05851			PITG_15566	-0.86299	0	-1.4125
PITG_01184			PITG_06222	-0.97682	-0.58309	-1.4098
PITG_06821			PITG_10777	-0.68085	-0.46692	-1.4047
PITG_16669			PITG_05301	-0.8723	-0.25151	-1.3911
PITG_05374			PITG_03656	-0.72623	0	-1.3858
PITG_04703			PITG_20264	-0.33591	0	-1.3727
PITG_05318			PITG_07888	-0.54765	-0.42945	-1.3691
PITG_05301			PITG_01255	-1.1785	0	-1.3655
PITG_00543			PITG_01762	-0.58006	-0.4974	-1.3627
PITG_08834			PITG_03915	-0.66629	-0.61865	-1.3601
PITG_14668			PITG_07797	-1.0129	-0.41747	-1.3564
PITG_13676			PITG_12864	-0.7031	-0.3715	-1.3547
PITG_09866			PITG_03632	-0.71381	-0.43038	-1.3515
PITG_12942			PITG_21071	-0.68666	-0.5533	-1.3514
Novel00139			PITG_19428	0	0	-1.349
PITG_20189			PITG_09536	-0.48453	0	-1.3414
PITG_09563			PITG_08032	-0.7485	-0.60107	-1.3375
PITG_05377			PITG_11923	-0.64229	-0.23256	-1.3263
PITG_12053			PITG_05992	-0.60225	-0.62493	-1.3132
PITG_17240			PITG_18298	-0.63884	-1.2635	-1.3053
PITG_04640			PITG_14456	-0.21598	-0.49551	-1.2961
PITG_05405			PITG_07841	-0.56005	-0.32883	-1.2942
PITG_03681			PITG_19007	-0.67136	-0.29684	-1.2805
PITG_16328			PITG_17748	-0.72633	-0.5575	-1.2766
PITG_10146			PITG_03322	-0.5176	-0.38046	-1.2652
PITG_03460			PITG_13600	-0.95148	-0.18207	-1.2595
PITG_11225			PITG_10974	-0.614	0	-1.2499
PITG_09726			PITG_11111	-0.70777	-0.3881	-1.2312
PITG_01235			PITG_01804	-0.7067	-0.37501	-1.2144
PITG_04618			PITG_20747	-0.59743	-0.37492	-1.2105
PITG_00443			PITG_13402	-0.67936	0	-1.2066
PITG_21393			PITG_01297	-0.63734	0	-1.1992
PITG_02455			PITG_05649	-0.51232	-0.2474	-1.1906
PITG_10974			PITG_02182	-0.58645	-0.86794	-1.1855
PITG_00765			PITG_11615	-0.44738	-0.6519	-1.1786
PITG_02854			PITG_13235	-0.34308	0	-1.1679
PITG_21661			PITG_01036	-0.61375	-0.31506	-1.1631
PITG_06505			PITG_14697	-0.62263	-0.42846	-1.1626
PITG_02621			PITG_09698	-0.6055	-0.24616	-1.1506
PITG_17727			PITG_04918	-0.69176	-0.5114	-1.1455
PITG_10193			PITG_07839	-0.58883	-0.62268	-1.1373
PITG_05354			PITG_08369	-0.56429	-0.50663	-1.1361
PITG_02182			PITG_06979	-0.81027	-0.26752	-1.1196
PITG_05009			PITG_07062	-0.54153	0	-1.1163
PITG_18251			PITG_12839	-0.70264	0	-1.1057
PITG_03620			PITG_12514	-0.9191	0	-1.1046
PITG_17127			PITG_05405	-0.73707	-0.12563	-1.0903
PITG_01042			PITG_12961	-0.58518	-0.46856	-1.0755
PITG_09442			Novel00139	0	0	-1.0341
PITG_17261			PITG_03274	-0.31637	0	-1.0278
PITG_19531			PITG_03916	-0.50097	0	-1.0182
PITG_03221			PITG_14609	-0.49563	0	-1.004
PITG_06454			PITG_02580	-0.48899	-0.30653	-0.99785
PITG_19999			PITG_16113	-0.62208	0	-0.98517
PITG_03762			PITG_00688	-0.24205	-0.58639	-0.98251
PITG_09576			PITG_05685	-0.4366	-0.64062	-0.97934
PITG_02001			PITG_10480	-0.60067	-0.22118	-0.96636
PITG_06979			PITG_15294	-0.55884	0	-0.95731
PITG_13596			PITG_01514	-0.2267	0	-0.94876
PITG_03398			PITG_05318	-0.60682	-0.33634	-0.93844
PITG_07455			PITG_17330	0	0	-0.93781
PITG_05694			PITG_05007	-0.53463	-0.49427	-0.93455
PITG_05733			PITG_03681	-0.72486	-0.45718	-0.93357
PITG_05171			PITG_03101	-0.6967	-0.65336	-0.92673
PITG_13735			PITG_13596	-0.50241	-0.64225	-0.91833
PITG_08761			PITG_11734	-0.61828	-0.37503	-0.90332
PITG_07234			PITG_09846	-0.71201	-0.33624	-0.8988
PITG_00302			PITG_12050	0	-0.29335	-0.89141
PITG_03274			PITG_16937	-0.65401	-0.18432	-0.8899
PITG_14278			Novel00453	-0.69459	-0.6177	-0.88535
PITG_06783			PITG_09596	-0.53325	-0.30608	-0.87623
PITG_07173			PITG_11139	-0.19144	-0.2099	-0.86694
PITG_01193			PITG_06440	-0.57598	-0.30852	-0.85579
PITG_03978			PITG_13735	0	-0.46456	-0.85287
PITG_13265			PITG_02221	-0.40736	-0.48769	-0.84917
PITG_03768			PITG_16669	-0.2869	0	-0.83773
PITG_00631			PITG_16328	-0.51657	-0.2874	-0.83672
PITG_09635			PITG_16023	-0.24365	-0.41116	-0.83655
PITG_18545			PITG_18251	0	0	-0.81945
PITG_10777			PITG_05520	-0.53997	-0.66774	-0.80377
PITG_08681			PITG_01193	-0.53403	-0.55199	-0.80348
PITG_09234			PITG_14668	0	0	-0.79753
PITG_22124			PITG_06749	-0.47232	-0.69902	-0.79424
PITG_09932			PITG_16741	-0.58419	-0.17087	-0.79262
PITG_15069			PITG_10979	-0.34144	0	-0.78455
PITG_06615			PITG_16024	0	-0.32984	-0.782
PITG_16024			PITG_13991	-0.56524	-0.64498	-0.77737
PITG_12161			Novel00866	0	0	-0.76289
PITG_14456			PITG_12151	-0.44308	-0.36927	-0.75668
PITG_17330			PITG_05245	-0.41783	-0.27195	-0.74939
PITG_17205			PITG_14278	-0.42632	-0.33942	-0.73901
PITG_20386			PITG_03599	-0.48443	-0.29932	-0.71339
PITG_09282			PITG_09637	0	-0.48103	-0.70064
PITG_17606			PITG_02455	-0.45479	0	-0.70047
PITG_17925			PITG_05733	-0.34588	0	-0.70022
PITG_09627			PITG_05354	-0.23142	0	-0.69225
PITG_02694			PITG_01564	0	-0.27954	-0.68453
PITG_00688			PITG_03799	-0.32848	0	-0.67693
PITG_14352			PITG_07455	-0.11912	-0.3624	-0.6659
PITG_06596			PITG_13165	-0.41686	-0.55562	-0.63547
PITG_04334			PITG_14918	-0.28409	-0.23231	-0.6186
PITG_03235			PITG_14557	-0.43061	-0.51971	-0.61854
PITG_14913			PITG_09791	-0.4731	-0.4012	-0.60692
PITG_13176			PITG_12942	0	0	-0.59417
PITG_09698			PITG_06505	0	0	-0.53696
PITG_10887			PITG_01756	-0.19698	0	-0.53357
PITG_01833			PITG_01235	-0.21746	0	-0.53128
Novel00345			PITG_02136	0	0	-0.51879
PITG_19399			PITG_00481	-0.35392	-0.46123	-0.4997
PITG_00074			PITG_03738	-0.44869	-0.19378	-0.47885
PITG_15810			PITG_19364	0	0	-0.47458
PITG_19656			PITG_06118	-0.14496	-0.31713	-0.43811
PITG_17032			PITG_17133	-0.13097	-0.24486	-0.43
PITG_03353			PITG_17727	0	0	-0.36567
PITG_13402			PITG_10519	0	0	-0.34645
PITG_22112			PITG_16856	0	0	-0.34035
PITG_19429			PITG_12540	0	-0.21854	-0.2552
PITG_17733			PITG_03295	0	-0.11646	-0.17628
PITG_09555			PITG_14577	0	0	0.3078
PITG_21022			PITG_05522	0	0	0.36765
PITG_08129			PITG_16088	0	0	0.38909
PITG_18538			Novel00400	0.23913	0.34118	0.41254
PITG_09092			PITG_00430	0	0	0.41448
PITG_01769			PITG_21021	0	0	0.44489
PITG_02578			PITG_00388	0.2722	0	0.44661
PITG_01564			PITG_15831	0	0	0.4613
PITG_12193			PITG_17604	0	0	0.46758
PITG_00566			PITG_15417	0	0.41257	0.54315
Novel00866			PITG_13030	0	0	0.57571
PITG_20795			PITG_11085	0	0.3812	0.62733
PITG_22572			Novel00351	0	0	0.71587
PITG_06819			PITG_16016	0	0	0.73271
PITG_15526			PITG_11468	0	0	0.91298
PITG_19280			Novel01596	0.36261	0	0.93322
PITG_10452			PITG_02357	0	0	0.96168
PITG_18054			PITG_06672	0.58798	0.41115	0.99368
PITG_11766			PITG_02361	0	0	1.0194
PITG_17129			PITG_17993	0.38086	0	1.026
PITG_10941			PITG_03660	0.48466	0.81469	1.0347
PITG_12300			PITG_02359	0	0	1.0674
PITG_00481			PITG_13613	0	0	1.0984
PITG_07839			PITG_02356	0	0	1.2204
PITG_03399			PITG_02360	0	0	1.2835
PITG_20746			Novel01157	0.49607	1.1041	1.3414
PITG_04698			PITG_01955	0	0	1.3694
Novel01480			PITG_17009	0.27305	0.33139	1.4043
PITG_12930			PITG_19121	0.28971	0	1.4402
PITG_05685			PITG_15629	0.62779	1.1633	1.4647
PITG_12961			PITG_14634	0.24986	0.31801	1.4703
PITG_07792			PITG_22313	0	0	1.4761
PITG_00910			PITG_12940	0.3408	0	1.4776
PITG_08809			PITG_17651	0	0	1.4785
PITG_13165			PITG_06147	0.96222	0	1.4808
PITG_06482			PITG_03427	0.7843	0.47598	1.5147
PITG_09579			PITG_01065	0.91032	0	1.5197
PITG_13235			PITG_02050	0.34108	0	1.6252
PITG_02221			PITG_00211	0.51907	0.6768	1.6514
PITG_08579			Novel01095	0.73911	1.2883	1.7604
PITG_14699			PITG_02354	0	0.83665	1.7902
PITG_17153			PITG_11393	0.87963	0.91235	1.9675
PITG_09345			PITG_03291	0.68933	0.57668	2.0414
PITG_12745			PITG_07943	0	0	2.1609
PITG_07380			Novel00146	0	0	2.8999
PITG_06595			Novel00907	1.2719	0	2.9959
PITG_04452			Novel00046	0	0	3.1655
PITG_10264			Novel01089	0	0	3.2663
Novel00453			PITG_13135	0	0	3.8425
PITG_03738			PITG_01761	2.4492	0.74803	3.8759
PITG_03956			PITG_13604	0	0	7.6909
PITG_17785
PITG_13403
PITG_02968
PITG_06222
PITG_18298
PITG_06048
PITG_03915
PITG_02921
PITG_02580
PITG_19157
PITG_17516
PITG_13832
PITG_07991
PITG_13262
PITG_03678
PITG_05649
PITG_02003
PITG_10202
PITG_13991
PITG_15090
PITG_20965
PITG_12524
PITG_13500
PITG_05805
PITG_13371
PITG_01514
PITG_01756
PITG_16915
PITG_13174
PITG_13681
PITG_16008
PITG_13139
PITG_03420
PITG_10866
PITG_13399
PITG_11110
PITG_08100
PITG_06722
PITG_08157
PITG_05174
PITG_19993
PITG_04515
PITG_10480
PITG_06636
PITG_01943
PITG_01195
PITG_02039
PITG_10263
PITG_19448
PITG_04992
PITG_14918
PITG_17983
PITG_15294
PITG_10519
PITG_02303
PITG_04487
PITG_05245
PITG_10979
PITG_00571
PITG_18052
PITG_02136
PITG_20116
PITG_03993
PITG_10007
PITG_03799
PITG_03101
PITG_22323
PITG_01255
PITG_07269
PITG_01062
PITG_17748
PITG_00179
PITG_22685
PITG_08669
PITG_04441
PITG_03294
PITG_01245
PITG_11139
PITG_02740
PITG_04382
PITG_06995
PITG_02925
Novel01297
PITG_09547
PITG_11923
PITG_09791
PITG_21010
PITG_09553
PITG_20689
PITG_19096
PITG_12514
PITG_13429
PITG_12077
PITG_14557
PITG_22135
PITG_12037
PITG_07141
PITG_09846
PITG_17786
PITG_16937
PITG_06799
PITG_02053
PITG_15566
PITG_12947
PITG_05058
PITG_08808
PITG_03656
PITG_16741
PITG_01217
PITG_20798
PITG_03098
PITG_12264
PITG_03493
PITG_04918
PITG_00166
PITG_12540
PITG_01041
PITG_09506
PITG_06771
PITG_22020
PITG_00397
PITG_11734
PITG_14936
PITG_21886
PITG_12483
PITG_01768
PITG_09540
PITG_08714
PITG_04601
PITG_19474
PITG_19364
PITG_09596
PITG_00221
PITG_09525
PITG_16556
PITG_01072
PITG_12535
PITG_15638
PITG_12864
PITG_03480
PITG_17921
PITG_03999
PITG_07841
PITG_22657
PITG_06845
PITG_03900
PITG_09521
PITG_10080
PITG_01913
PITG_08369
PITG_08703
PITG_07062
PITG_10110
PITG_04729
PITG_00693
PITG_15449
PITG_11560
PITG_08032
PITG_12697
PITG_16198
PITG_12727
PITG_08548
PITG_21071
PITG_07300
PITG_03599
PITG_06118
PITG_03916
PITG_11457
PITG_12462
PITG_01711
PITG_03486
PITG_00941
PITG_19428
PITG_09640
PITG_12839
PITG_19551
PITG_20747
PITG_01036
PITG_05346
PITG_00523
PITG_06237
Novel00116
PITG_19669
PITG_01922
PITG_14608
PITG_14609
PITG_18518
PITG_00133
PITG_04683
PITG_11111
PITG_03178
PITG_09536
PITG_11099
PITG_12050
PITG_07888
PITG_05007
PITG_13607
PITG_04843
PITG_12151
PITG_06749
PITG_15407
PITG_15393
PITG_03239
PITG_05992
PITG_00163
PITG_00570
PITG_15723
PITG_07885
PITG_19932
PITG_16113
PITG_08955
PITG_05363
PITG_09550
PITG_02547
PITG_06267
PITG_14729
PITG_02198
PITG_10454
PITG_05520
PITG_04774
PITG_20759
PITG_17790
PITG_08959
PITG_16856
PITG_17608
PITG_10089
Novel00841
PITG_17607
PITG_14044
PITG_14697
PITG_13924
PITG_01804
PITG_03322
PITG_05781
PITG_20264
PITG_06518
PITG_06440
PITG_11615
Novel00015
PITG_09582
PITG_10916
PITG_03802
PITG_14639
PITG_09637
PITG_07797
PITG_17093
PITG_03661
PITG_07024
PITG_03410
PITG_03712

## Sheet: Table S8F
The synergistic DEGs in the GO terms of organonitrogen compound metabolic process
				log2FoldChange
Total DEGs in organonitrogen compound metabolic process			Synergistic DEGs in organonitrogen compound metabolic process	AZD	RAP	RAP+AZD		organonitrogen compound metabolic process						down	up
PITG_16480			PITG_22657	-1.6992	-0.96753	-5.7348		ratio of synergistic DEGs					Number of synergistic DEGs	325	80
Novel01571			PITG_19656	-2.041	-0.17275	-5.4393		0.560942					ratio	0.802469	0.197531
PITG_23229			PITG_19993	-1.9874	0	-4.8699
PITG_21336			PITG_17608	-1.5446	0	-4.654
Novel01218			PITG_14352	-1.4781	0	-4.3323
Novel01524			PITG_19399	-1.7555	0	-3.67
Novel01666			PITG_21127	-1.1688	-0.29746	-3.537
PITG_14920			PITG_18545	-1.7813	0	-3.5033
PITG_07098			PITG_14639	-2.1748	-0.53264	-3.3433
PITG_10167			PITG_12483	-1.2917	-0.42801	-3.3137
PITG_08598			PITG_08714	-1.2619	-0.88598	-3.2316
PITG_14808			PITG_00571	-1.5638	-0.37525	-3.1088
PITG_03597			PITG_17507	-0.75487	-0.89718	-3.087
PITG_14216			PITG_09289	-1.2027	0	-3.0527
PITG_05537			PITG_22685	-1.9131	-1.8988	-2.9856
PITG_04255			PITG_12300	-1.7225	-0.32535	-2.976
PITG_01188			PITG_21661	-1.0515	0	-2.9639
PITG_04337			PITG_02925	-2.461	-2.2666	-2.9061
PITG_07905			PITG_17289	-1.1752	-0.85605	-2.875
PITG_10077			PITG_15810	-1.5158	-0.97845	-2.8702
Novel00822			PITG_06596	-1.2658	-0.18773	-2.8435
PITG_08022			PITG_04640	-1.2968	-0.45835	-2.8183
PITG_16457			PITG_05377	-1.4032	-0.47691	-2.8044
PITG_08125			PITG_17607	-1.1313	-0.82207	-2.8034
PITG_16057			PITG_09582	-0.73745	0	-2.7804
PITG_11178			PITG_06722	-1.1361	-0.32418	-2.7202
PITG_08110			PITG_11110	-1.1459	-0.32197	-2.7137
PITG_00257			PITG_10110	-0.64546	-1.2793	-2.6635
PITG_19780			PITG_21393	-1.3358	-0.703	-2.6271
PITG_10301			PITG_16736	-1.0478	-0.43737	-2.6255
PITG_10516			PITG_14696	-1.506	-0.38879	-2.6041
PITG_17919			PITG_18054	-0.9877	-0.15493	-2.5731
PITG_03093			PITG_20689	-1.0841	-0.18083	-2.5491
PITG_19679			PITG_03768	-1.0332	-0.22317	-2.5447
PITG_16280			PITG_10916	-1.095	-0.18977	-2.5358
PITG_04747			PITG_17983	-1.4536	-0.26575	-2.5344
PITG_03358			PITG_16915	-1.0946	-0.11743	-2.5053
Novel01371			PITG_13924	-1.1819	0	-2.5045
PITG_22715			PITG_04441	-2.1211	-1.5358	-2.4655
Novel00981			PITG_00397	-1.1807	-0.18108	-2.46
PITG_21503			PITG_12727	-1.3256	-0.65998	-2.4361
PITG_06022			PITG_08548	-1.3863	-0.39198	-2.4312
PITG_10601			PITG_02039	-0.92228	-0.33696	-2.4118
PITG_00912			PITG_06021	-0.71195	-1.2315	-2.4106
PITG_18882			PITG_09525	-1.2178	-0.24398	-2.3598
PITG_11926			PITG_08002	-1.1052	-0.50218	-2.3403
Novel01230			PITG_02740	-1.7124	-1.483	-2.3306
PITG_19939			PITG_00910	-1.1313	-0.36958	-2.328
PITG_08810			PITG_06482	-1.1719	-0.56119	-2.3223
PITG_10595			PITG_09521	-0.96955	0	-2.3156
PITG_17711			PITG_17785	-1.2918	-0.6026	-2.3098
PITG_15694			PITG_22112	-1.1422	0	-2.3047
PITG_13395			Novel00116	0	0	-2.3028
PITG_00578			PITG_05551	-1.1021	0	-2.275
Novel00046			PITG_06821	-1.0503	0	-2.2649
Novel00400			PITG_21022	-1.6882	-0.69665	-2.257
PITG_17009			PITG_13265	-0.88625	-0.45356	-2.243
PITG_16061			PITG_20759	-1.0876	-0.88431	-2.242
PITG_13030			PITG_10941	-1.0571	-0.30619	-2.2292
PITG_02352			PITG_12193	-0.99172	-0.27516	-2.2273
Novel00819			PITG_06454	-0.77843	-0.99581	-2.2154
PITG_06147			PITG_14729	-1.2669	0	-2.208
PITG_17604			PITG_09726	-0.93135	-0.35268	-2.2073
PITG_00294			PITG_07405	-1.1985	-0.53419	-2.2031
PITG_06031			PITG_00074	-0.86846	-0.59105	-2.1928
PITG_06672			PITG_20798	-1.1589	-0.49495	-2.1841
Novel01770			PITG_03420	-1.2542	-0.17443	-2.1718
PITG_03055			PITG_03992	-0.81427	-0.32401	-2.1696
PITG_02361			PITG_17947	-0.60967	-1.0108	-2.1591
PITG_09402			PITG_00523	-1.1632	-0.34026	-2.159
PITG_18437			PITG_13399	-0.81993	-0.44855	-2.1521
PITG_05953			PITG_03993	-0.92775	-0.1943	-2.1495
PITG_14577			PITG_14195	-1.168	-0.27997	-2.1429
PITG_06911			PITG_09631	-0.88021	-0.27741	-2.1393
PITG_15267			PITG_14936	-0.59239	-0.61315	-2.1368
PITG_09387			PITG_20116	-0.70509	0	-2.1278
PITG_03299			PITG_00132	-0.84067	-1.5066	-2.1263
PITG_01955			PITG_13831	-0.91553	-0.56582	-2.0947
Novel01157			PITG_00302	-1.0358	-0.50621	-2.0847
Novel01089			PITG_06636	-0.82566	-0.31728	-2.083
PITG_17993			PITG_18018	-0.91946	-0.45906	-2.0647
PITG_15629			PITG_13682	-0.74521	-0.38273	-2.0609
PITG_09400			PITG_19157	-0.8198	-0.54308	-2.0455
PITG_18435			PITG_03460	-0.90313	-0.53661	-2.0425
PITG_07349			PITG_21886	-0.91313	-0.13918	-2.0217
PITG_12940			PITG_03661	-1.0768	-0.48564	-2.0065
PITG_20491			PITG_19531	-0.86799	-0.39807	-2.003
PITG_09891			PITG_21010	-1.0674	-0.27182	-1.9891
PITG_13613			PITG_14608	-1.1228	-0.32652	-1.988
PITG_16203			PITG_03598	-0.65087	-1.5574	-1.9693
PITG_02750			PITG_13174	-0.89001	-0.49246	-1.9582
PITG_02363			PITG_05174	-1.0871	-0.32161	-1.9526
PITG_07820			PITG_08001	-1.3147	-1.2503	-1.9504
PITG_02354			PITG_00163	-1.1286	-0.90685	-1.9504
PITG_17651			PITG_20386	-0.95635	-0.10644	-1.9099
Novel01482			PITG_09817	-1.1077	0	-1.8963
PITG_20272			PITG_00765	-0.70065	-0.64756	-1.8955
PITG_02857			PITG_04683	-0.786	0	-1.8716
PITG_10138			PITG_05363	-1.702	0	-1.8646
Novel01095			PITG_04382	-0.92557	-0.2457	-1.8597
PITG_11468			PITG_19551	-1.0484	-0.38596	-1.8587
PITG_02353			PITG_15526	-0.51876	-0.55753	-1.8376
PITG_08135			PITG_08100	-0.88358	0	-1.8334
PITG_11719			PITG_08579	-0.86591	-0.3614	-1.8248
PITG_02362			PITG_09627	-0.95503	-0.38538	-1.8208
PITG_02357			PITG_09547	-0.93505	0	-1.8126
PITG_16088			PITG_02663	-0.8075	-0.23004	-1.8092
PITG_10270			PITG_17240	-0.98526	-0.27186	-1.8079
PITG_04715			PITG_19096	-0.77784	0	-1.8051
PITG_14634			PITG_06819	-0.85782	-0.23245	-1.8036
PITG_00388			PITG_01217	-0.57408	0	-1.8031
PITG_02358			PITG_09640	-1.31	0	-1.798
PITG_11085			PITG_04601	-0.67374	-0.2154	-1.7956
Novel00907			PITG_01769	-0.73841	-0.14298	-1.7929
PITG_02973			Novel00345	-1.038	0	-1.7731
PITG_12121			PITG_07792	-0.57344	-0.57264	-1.7693
PITG_00401			PITG_12264	-0.9942	-0.34827	-1.7674
PITG_02757			PITG_12697	-0.9168	-0.4886	-1.7577
PITG_13604			PITG_01245	-0.60611	-0.37975	-1.7545
PITG_21021			PITG_10089	-0.45093	-0.33681	-1.7417
PITG_18188			PITG_09234	-0.74214	-0.4484	-1.7413
Novel01105			PITG_09576	-0.98176	-0.24242	-1.7338
Novel00351			PITG_07671	-0.68741	-0.60109	-1.7324
PITG_05263			PITG_07141	-0.78385	-0.61108	-1.7312
PITG_04708			PITG_09932	-0.7775	-0.36378	-1.7247
PITG_01761			PITG_18518	-0.64976	-0.49144	-1.7063
PITG_03740			PITG_01768	-0.8311	-1.0487	-1.7035
PITG_04003			PITG_09506	-0.73227	-0.14804	-1.6866
PITG_19147			PITG_04992	-0.68161	-0.54612	-1.6697
Novel00167			PITG_03620	-0.84441	-0.69715	-1.6686
PITG_19121			PITG_19448	-0.86568	-0.32929	-1.6664
PITG_02767			PITG_06595	-0.66568	-0.53541	-1.6639
PITG_07866			PITG_04487	-0.97611	0	-1.6543
PITG_00029			PITG_08808	-0.63885	-0.95092	-1.6524
PITG_15831			PITG_01184	-0.81998	-0.26479	-1.6435
PITG_13135			PITG_20687	-0.79065	-0.29001	-1.6425
PITG_17508			PITG_20559	-0.44881	0	-1.6358
PITG_00913			PITG_06427	-0.79667	-0.31739	-1.6351
PITG_08439			PITG_09282	-0.47478	-0.34121	-1.6164
PITG_05522			PITG_17786	-0.94349	-0.96991	-1.6162
Novel01663			PITG_20965	-0.60403	-0.43157	-1.6126
PITG_11630			PITG_03700	-1.5205	-1.2575	-1.5931
PITG_02360			PITG_09699	-0.69059	-0.42177	-1.5848
PITG_06476			PITG_17500	0	0	-1.5593
PITG_02852			PITG_12930	-0.52525	-0.26833	-1.5476
PITG_07283			PITG_07885	-0.79609	-0.27465	-1.5433
PITG_02359			PITG_11225	-0.59258	-0.21944	-1.5385
PITG_00430			PITG_12535	-0.48442	0	-1.5366
PITG_02356			PITG_13749	-0.62965	-0.27158	-1.536
PITG_01065			PITG_06267	-0.45143	-0.29381	-1.5312
PITG_09273			PITG_13586	-0.78505	0	-1.5254
PITG_22313			PITG_13176	-0.76734	-0.21246	-1.5225
PITG_00471			PITG_05636	-0.47753	-0.56273	-1.5186
PITG_15417			PITG_09555	-0.22447	0	-1.5175
PITG_15139			PITG_03698	-0.65255	-0.97255	-1.5092
PITG_03660			PITG_04618	-0.57228	-1.468	-1.5045
PITG_11116			PITG_00566	-0.70127	-0.45132	-1.4947
PITG_00417			PITG_12053	-0.41354	-0.28677	-1.4887
PITG_07943			PITG_17733	-1.1471	0	-1.4783
PITG_01851			PITG_05628	-0.38117	-0.22428	-1.4779
PITG_11728			PITG_10007	-0.63013	0	-1.4715
PITG_02364			PITG_09553	-0.57375	-0.27122	-1.4676
PITG_03291			PITG_17790	-0.56779	-0.27448	-1.4514
PITG_08411			PITG_09635	-0.73383	-0.51897	-1.45
Novel00922			PITG_04703	0	0	-1.4467
PITG_15644			PITG_04698	-0.70507	-0.51319	-1.4446
Novel01596			PITG_17925	-0.82309	-0.67313	-1.4438
PITG_02050			PITG_00133	-0.5995	-0.35811	-1.4325
PITG_21619			PITG_15393	-0.93412	0	-1.424
PITG_02210			PITG_01711	-0.97068	-0.49331	-1.4235
PITG_02355			PITG_15566	-0.86299	0	-1.4125
PITG_11393			PITG_06222	-0.97682	-0.58309	-1.4098
PITG_21806			PITG_10777	-0.68085	-0.46692	-1.4047
PITG_20192			PITG_11013	-0.60073	-0.65639	-1.3933
Novel00070			PITG_05301	-0.8723	-0.25151	-1.3911
PITG_16016			PITG_03656	-0.72623	0	-1.3858
PITG_00211			PITG_05225	0	-0.19491	-1.3754
PITG_19191			PITG_20264	-0.33591	0	-1.3727
PITG_15100			PITG_07888	-0.54765	-0.42945	-1.3691
PITG_09807			PITG_01255	-1.1785	0	-1.3655
Novel00146			PITG_01762	-0.58006	-0.4974	-1.3627
PITG_22391			PITG_03915	-0.66629	-0.61865	-1.3601
PITG_03427			PITG_07797	-1.0129	-0.41747	-1.3564
PITG_22381			PITG_12864	-0.7031	-0.3715	-1.3547
PITG_09345			PITG_03632	-0.71381	-0.43038	-1.3515
PITG_00636			PITG_21071	-0.68666	-0.5533	-1.3514
PITG_01296			PITG_19428	0	0	-1.349
PITG_12745			PITG_09536	-0.48453	0	-1.3414
Novel00453			PITG_08032	-0.7485	-0.60107	-1.3375
PITG_04452			PITG_11923	-0.64229	-0.23256	-1.3263
PITG_10264			PITG_08206	-0.38881	0	-1.3171
PITG_07380			PITG_05992	-0.60225	-0.62493	-1.3132
PITG_06595			PITG_15850	-0.78009	-0.48576	-1.3077
PITG_04665			PITG_18298	-0.63884	-1.2635	-1.3053
PITG_13165			PITG_14456	-0.21598	-0.49551	-1.2961
PITG_06482			PITG_07841	-0.56005	-0.32883	-1.2942
PITG_09579			PITG_00997	-0.52236	-0.39977	-1.288
PITG_13235			PITG_19007	-0.67136	-0.29684	-1.2805
PITG_17153			PITG_17748	-0.72633	-0.5575	-1.2766
PITG_14699			PITG_03322	-0.5176	-0.38046	-1.2652
PITG_08579			PITG_13600	-0.95148	-0.18207	-1.2595
PITG_02221			PITG_10974	-0.614	0	-1.2499
PITG_08000			PITG_11111	-0.70777	-0.3881	-1.2312
PITG_06222			PITG_01804	-0.7067	-0.37501	-1.2144
PITG_18298			PITG_20747	-0.59743	-0.37492	-1.2105
PITG_08001			PITG_13402	-0.67936	0	-1.2066
PITG_03738			PITG_01297	-0.63734	0	-1.1992
PITG_13682			PITG_05649	-0.51232	-0.2474	-1.1906
PITG_17785			PITG_02182	-0.58645	-0.86794	-1.1855
PITG_03956			PITG_11615	-0.44738	-0.6519	-1.1786
PITG_02968			PITG_02105	-0.64033	-0.52632	-1.1761
PITG_13403			PITG_02256	-0.24269	-0.59662	-1.172
PITG_20350			PITG_13235	-0.34308	0	-1.1679
PITG_13832			PITG_01862	-0.65733	-0.6336	-1.1669
PITG_17516			PITG_01036	-0.61375	-0.31506	-1.1631
PITG_13427			PITG_14697	-0.62263	-0.42846	-1.1626
PITG_03915			PITG_09698	-0.6055	-0.24616	-1.1506
PITG_06048			PITG_04918	-0.69176	-0.5114	-1.1455
PITG_02921			PITG_07839	-0.58883	-0.62268	-1.1373
PITG_19148			PITG_08369	-0.56429	-0.50663	-1.1361
PITG_19157			PITG_08802	-0.8667	-0.61291	-1.1304
PITG_02580			PITG_06979	-0.81027	-0.26752	-1.1196
PITG_10202			PITG_07062	-0.54153	0	-1.1163
PITG_02003			PITG_12839	-0.70264	0	-1.1057
PITG_05805			PITG_12514	-0.9191	0	-1.1046
PITG_13500			PITG_08000	-0.24465	-0.21855	-1.0979
PITG_12524			PITG_05405	-0.73707	-0.12563	-1.0903
PITG_20965			PITG_12961	-0.58518	-0.46856	-1.0755
PITG_15090			PITG_21397	-0.43747	-0.25058	-1.0386
PITG_13991			Novel00139	0	0	-1.0341
PITG_16915			PITG_03274	-0.31637	0	-1.0278
PITG_01756			PITG_03916	-0.50097	0	-1.0182
PITG_01514			PITG_14609	-0.49563	0	-1.004
PITG_13371			PITG_02580	-0.48899	-0.30653	-0.99785
PITG_04466			PITG_16113	-0.62208	0	-0.98517
PITG_13174			PITG_00688	-0.24205	-0.58639	-0.98251
PITG_05347			PITG_05685	-0.4366	-0.64062	-0.97934
PITG_13749			PITG_10480	-0.60067	-0.22118	-0.96636
PITG_13262			PITG_10858	-0.46118	-0.40681	-0.96555
PITG_07991			PITG_17999	-0.61045	-0.36203	-0.96511
PITG_05649			PITG_15294	-0.55884	0	-0.95731
PITG_03678			PITG_15321	-0.60654	-0.32523	-0.9555
PITG_19656			PITG_01514	-0.2267	0	-0.94876
PITG_15810			PITG_05318	-0.60682	-0.33634	-0.93844
PITG_00074			PITG_17330	0	0	-0.93781
PITG_17032			PITG_05007	-0.53463	-0.49427	-0.93455
PITG_04334			PITG_03681	-0.72486	-0.45718	-0.93357
PITG_06596			PITG_03101	-0.6967	-0.65336	-0.92673
PITG_03235			PITG_00754	0	0	-0.92261
PITG_09220			PITG_13596	-0.50241	-0.64225	-0.91833
PITG_03598			PITG_11734	-0.61828	-0.37503	-0.90332
PITG_01833			PITG_04665	-0.85035	-0.54861	-0.90023
PITG_10887			PITG_09846	-0.71201	-0.33624	-0.8988
PITG_09698			PITG_02785	-0.84785	-0.57799	-0.89435
PITG_14913			PITG_12050	0	-0.29335	-0.89141
PITG_13176			PITG_16937	-0.65401	-0.18432	-0.8899
PITG_19399			Novel00453	-0.69459	-0.6177	-0.88535
Novel00345			PITG_16966	-0.61928	-0.34764	-0.87657
PITG_08129			PITG_09596	-0.53325	-0.30608	-0.87623
PITG_21022			PITG_11139	-0.19144	-0.2099	-0.86694
PITG_01769			PITG_16807	-0.55152	-0.28376	-0.86597
PITG_18538			PITG_17929	-0.18498	-0.1984	-0.85979
PITG_09092			PITG_03277	-0.30035	-0.47605	-0.85762
PITG_01564			PITG_14083	-0.49737	-0.72094	-0.85658
PITG_14195			PITG_06440	-0.57598	-0.30852	-0.85579
PITG_02578			PITG_13735	0	-0.46456	-0.85287
PITG_16966			PITG_02221	-0.40736	-0.48769	-0.84917
PITG_03353			PITG_16669	-0.2869	0	-0.83773
PITG_22112			PITG_16328	-0.51657	-0.2874	-0.83672
PITG_13402			PITG_16023	-0.24365	-0.41116	-0.83655
PITG_09555			PITG_04851	-0.29059	-0.5598	-0.83025
PITG_17733			PITG_18251	0	0	-0.81945
PITG_19429			PITG_13427	-0.37195	-0.14605	-0.81118
PITG_11766			PITG_05520	-0.53997	-0.66774	-0.80377
PITG_07400			PITG_01193	-0.53403	-0.55199	-0.80348
PITG_17129			PITG_14668	0	0	-0.79753
PITG_17501			PITG_06749	-0.47232	-0.69902	-0.79424
PITG_03685			PITG_09101	-0.54465	0	-0.79356
PITG_10941			PITG_16741	-0.58419	-0.17087	-0.79262
PITG_00566			PITG_10979	-0.34144	0	-0.78455
PITG_12193			PITG_16024	0	-0.32984	-0.782
PITG_20795			PITG_13991	-0.56524	-0.64498	-0.77737
PITG_22572			PITG_03685	-0.44177	-0.55819	-0.77401
PITG_09817			Novel00866	0	0	-0.76289
Novel00866			PITG_12151	-0.44308	-0.36927	-0.75668
PITG_10452			PITG_05245	-0.41783	-0.27195	-0.74939
PITG_19280			PITG_14278	-0.42632	-0.33942	-0.73901
PITG_06819			PITG_03599	-0.48443	-0.29932	-0.71339
PITG_15526			PITG_04207	0	0	-0.70614
PITG_18054			PITG_09637	0	-0.48103	-0.70064
PITG_10032			PITG_02455	-0.45479	0	-0.70047
Novel01480			PITG_05733	-0.34588	0	-0.70022
PITG_05685			PITG_05354	-0.23142	0	-0.69225
PITG_12930			PITG_01564	0	-0.27954	-0.68453
PITG_08809			PITG_03799	-0.32848	0	-0.67693
PITG_00910			PITG_07455	-0.11912	-0.3624	-0.6659
PITG_07792			PITG_10139	0	-0.39814	-0.64741
PITG_12961			PITG_02735	-0.2235	0	-0.64262
PITG_12300			PITG_01296	0	0	-0.64134
PITG_00481			PITG_13165	-0.41686	-0.55562	-0.63547
PITG_07839			PITG_00757	-0.42121	0	-0.63305
PITG_04698			PITG_19148	-0.49838	-0.44666	-0.62935
PITG_20746			PITG_14918	-0.28409	-0.23231	-0.6186
PITG_03399			PITG_14557	-0.43061	-0.51971	-0.61854
PITG_00757			PITG_16794	-0.28241	-0.28337	-0.61074
PITG_17261			PITG_09791	-0.4731	-0.4012	-0.60692
PITG_09442			PITG_12942	0	0	-0.59417
PITG_17999			PITG_01580	-0.33155	-0.20362	-0.5662
PITG_08802			PITG_06505	0	0	-0.53696
PITG_19531			PITG_01756	-0.19698	0	-0.53357
PITG_05009			PITG_01235	-0.21746	0	-0.53128
PITG_18251			PITG_02136	0	0	-0.51879
PITG_02182			PITG_00481	-0.35392	-0.46123	-0.4997
PITG_03620			PITG_06015	-0.34734	-0.36435	-0.49314
PITG_02594			PITG_03738	-0.44869	-0.19378	-0.47885
PITG_17127			PITG_19364	0	0	-0.47458
PITG_05380			PITG_06134	0	0	-0.44802
PITG_01042			PITG_06118	-0.14496	-0.31713	-0.43811
PITG_05733			PITG_17133	-0.13097	-0.24486	-0.43
PITG_05694			Novel01146	0	0	-0.4078
PITG_13116			PITG_17727	0	0	-0.36567
PITG_07455			PITG_10519	0	0	-0.34645
PITG_02858			PITG_16856	0	0	-0.34035
PITG_16807			PITG_12540	0	-0.21854	-0.2552
PITG_08761			PITG_03295	0	-0.11646	-0.17628
PITG_05171			PITG_04003	0	0	0.14526
PITG_13735			PITG_14577	0	0	0.3078
PITG_07234			PITG_07820	0	0	0.33252
PITG_17945			PITG_05522	0	0	0.36765
PITG_05636			PITG_16088	0	0	0.38909
PITG_08002			PITG_03299	0	0	0.4069
PITG_06783			Novel00400	0.23913	0.34118	0.41254
PITG_00302			PITG_00430	0	0	0.41448
PITG_14278			PITG_21021	0	0	0.44489
PITG_03274			PITG_00388	0.2722	0	0.44661
PITG_03221			Novel01663	0	0	0.44831
PITG_06454			PITG_15831	0	0	0.4613
PITG_19999			PITG_17604	0	0	0.46758
PITG_03762			PITG_08439	0	0	0.53794
PITG_02001			PITG_15417	0	0.41257	0.54315
PITG_06979			PITG_20272	0	0	0.57076
PITG_09576			PITG_13030	0	0	0.57571
PITG_00132			PITG_11085	0	0.3812	0.62733
PITG_03398			PITG_03055	0	0	0.71029
PITG_13596			Novel00351	0	0	0.71587
PITG_00997			PITG_16016	0	0	0.73271
PITG_06427			PITG_18437	0	0	0.74629
PITG_10777			PITG_01851	0.63367	0.47816	0.80391
PITG_07405			PITG_02857	0.2379	0.37553	0.80508
PITG_18545			PITG_02852	0.36469	0.45002	0.90991
PITG_09234			PITG_11468	0	0	0.91298
PITG_08681			PITG_22381	0	0.3884	0.9151
PITG_22124			PITG_17508	0.59342	0	0.91805
PITG_09932			Novel01596	0.36261	0	0.93322
PITG_03978			PITG_08135	0.26461	0.13497	0.95187
PITG_01193			PITG_02357	0	0	0.96168
PITG_07173			PITG_06672	0.58798	0.41115	0.99368
PITG_03768			PITG_02361	0	0	1.0194
PITG_00631			PITG_17993	0.38086	0	1.026
PITG_13265			PITG_03660	0.48466	0.81469	1.0347
PITG_09635			PITG_02359	0	0	1.0674
PITG_20386			PITG_20491	0.52058	0.4851	1.0743
PITG_17205			PITG_13613	0	0	1.0984
PITG_15850			PITG_00029	0.2927	0	1.11
PITG_17606			PITG_21806	0.44966	0.40904	1.1568
PITG_09282			PITG_09807	0	0	1.2094
PITG_02694			PITG_02356	0	0	1.2204
PITG_00688			PITG_02360	0	0	1.2835
PITG_14352			Novel01157	0.49607	1.1041	1.3414
PITG_09627			PITG_01955	0	0	1.3694
PITG_17925			PITG_02757	1.1553	0	1.376
PITG_12161			Novel01482	0	0	1.3796
PITG_16024			PITG_17009	0.27305	0.33139	1.4043
PITG_06615			PITG_19121	0.28971	0	1.4402
PITG_15069			PITG_15629	0.62779	1.1633	1.4647
PITG_14456			PITG_14634	0.24986	0.31801	1.4703
PITG_17330			PITG_22313	0	0	1.4761
PITG_02663			PITG_12940	0.3408	0	1.4776
PITG_01297			PITG_17651	0	0	1.4785
PITG_15321			PITG_06147	0.96222	0	1.4808
PITG_14850			PITG_08411	0.67918	0.84539	1.501
PITG_13586			PITG_03427	0.7843	0.47598	1.5147
PITG_00028			PITG_01065	0.91032	0	1.5197
PITG_03295			PITG_02050	0.34108	0	1.6252
PITG_17133			PITG_00913	1.0364	1.3025	1.6479
PITG_15697			PITG_00211	0.51907	0.6768	1.6514
PITG_04851			Novel01095	0.73911	1.2883	1.7604
PITG_03698			PITG_02354	0	0.83665	1.7902
PITG_09289			PITG_06476	0	0.7645	1.8586
PITG_01762			PITG_00578	1.5947	0.32485	1.9556
PITG_20188			PITG_11393	0.87963	0.91235	1.9675
PITG_18018			PITG_03291	0.68933	0.57668	2.0414
PITG_02992			PITG_07943	0	0	2.1609
PITG_03632			PITG_15644	0	0	2.2043
PITG_10139			PITG_06031	0.50523	0.29984	2.2111
PITG_13831			Novel00146	0	0	2.8999
PITG_10863			Novel00907	1.2719	0	2.9959
PITG_14596			Novel00046	0	0	3.1655
PITG_13600			Novel01089	0	0	3.2663
PITG_16023			PITG_10138	1.5288	0	3.6311
PITG_01184			PITG_02767	1.2443	0	3.7407
PITG_06821			PITG_13135	0	0	3.8425
PITG_05318			PITG_01761	2.4492	0.74803	3.8759
PITG_16669			Novel00070	0	0	4.5362
PITG_04703			PITG_13604	0	0	7.6909
PITG_05374
PITG_09631
PITG_16757
PITG_16736
PITG_16794
PITG_19007
PITG_01580
PITG_05851
PITG_09552
PITG_21127
PITG_05377
PITG_09563
PITG_03357
PITG_20189
PITG_17240
PITG_12053
PITG_05405
PITG_04640
PITG_02256
PITG_06021
PITG_04717
PITG_05301
PITG_00543
PITG_08834
PITG_13676
PITG_14668
PITG_21397
Novel00139
PITG_09866
PITG_12942
PITG_02455
PITG_21393
PITG_02854
PITG_10974
PITG_00765
PITG_06505
PITG_02621
PITG_21661
PITG_05354
PITG_10193
PITG_17727
PITG_10146
PITG_03681
PITG_16328
PITG_20687
PITG_03460
PITG_01235
PITG_09726
PITG_11225
PITG_00443
PITG_04618
PITG_06749
PITG_14083
PITG_09815
PITG_03239
PITG_05225
PITG_15393
PITG_15407
PITG_05992
PITG_00163
PITG_10858
PITG_04683
PITG_03178
PITG_11111
PITG_05007
PITG_21313
PITG_07888
PITG_12050
PITG_09536
PITG_09101
PITG_11099
PITG_04843
PITG_12151
PITG_13607
PITG_09550
PITG_05363
PITG_02547
PITG_14729
PITG_06267
PITG_02198
PITG_00570
PITG_15723
PITG_19932
PITG_07885
PITG_08955
PITG_15057
PITG_16113
PITG_17607
PITG_14697
PITG_14044
PITG_20264
PITG_05781
PITG_03322
PITG_01804
PITG_13924
PITG_06518
PITG_17998
PITG_09393
PITG_05520
PITG_10454
PITG_04774
PITG_20759
PITG_17790
PITG_16856
PITG_08959
Novel00841
PITG_17608
PITG_10089
PITG_17093
PITG_07797
PITG_09637
PITG_03410
PITG_18056
PITG_07024
PITG_03661
PITG_00553
PITG_02105
PITG_03712
PITG_06440
PITG_05628
PITG_09582
Novel00015
PITG_11615
PITG_03802
PITG_10916
PITG_04207
PITG_14639
PITG_06845
PITG_03900
PITG_09521
PITG_12864
PITG_12535
PITG_15638
PITG_05551
PITG_03999
PITG_17921
PITG_03480
PITG_07841
PITG_22657
PITG_11013
PITG_00693
PITG_04729
PITG_10110
PITG_17500
PITG_11560
PITG_15449
PITG_16198
PITG_08032
PITG_12697
PITG_10080
PITG_08703
PITG_08369
PITG_01913
PITG_07062
PITG_11457
PITG_03486
PITG_12462
PITG_01711
PITG_00177
PITG_09640
PITG_12839
PITG_19428
PITG_00941
PITG_08548
PITG_03277
PITG_12727
PITG_07300
PITG_21071
PITG_03599
PITG_03916
PITG_06118
PITG_06134
PITG_06237
PITG_19669
Novel00116
PITG_18518
PITG_14609
PITG_01922
PITG_14608
PITG_00133
PITG_20747
PITG_19551
PITG_01036
PITG_05346
PITG_00523
PITG_21010
PITG_20689
PITG_09553
PITG_19096
PITG_20559
PITG_04382
PITG_01862
PITG_06995
PITG_02925
PITG_02785
PITG_11923
Novel01297
PITG_09547
PITG_09791
PITG_12037
PITG_22135
PITG_14557
PITG_09699
PITG_08206
PITG_09846
PITG_07141
PITG_17786
PITG_12514
PITG_17289
PITG_13429
PITG_12077
PITG_14696
PITG_17929
PITG_06016
PITG_12540
PITG_06771
PITG_09506
PITG_01041
PITG_03992
PITG_00397
PITG_22020
PITG_05058
PITG_02735
PITG_15566
PITG_12947
PITG_06799
PITG_16937
PITG_02053
PITG_16741
PITG_03656
PITG_08808
PITG_03098
PITG_01217
Novel01146
PITG_20798
PITG_16048
PITG_00166
PITG_04918
PITG_12264
PITG_03493
PITG_19364
PITG_19474
PITG_00221
PITG_00754
PITG_09596
PITG_01072
PITG_16556
PITG_09525
PITG_14936
PITG_11734
PITG_21886
PITG_12483
PITG_04601
PITG_09540
PITG_08714
PITG_01768
PITG_13301
PITG_13399
PITG_10866
PITG_03420
PITG_06722
PITG_08157
PITG_08100
PITG_11110
PITG_19993
PITG_05174
PITG_02786
PITG_06015
PITG_16008
PITG_13681
PITG_13139
PITG_17947
PITG_01943
PITG_01195
PITG_10263
PITG_02039
PITG_19448
PITG_04515
PITG_06636
PITG_10480
PITG_20970
PITG_10519
PITG_02303
PITG_04487
PITG_05245
PITG_03078
PITG_00571
PITG_10979
PITG_14918
PITG_04992
PITG_03700
PITG_17983
PITG_15294
PITG_22685
PITG_00179
PITG_04441
PITG_08669
PITG_01245
PITG_03294
PITG_07671
PITG_02740
PITG_11139
PITG_21517
PITG_21697
PITG_18052
PITG_03993
PITG_02136
PITG_20116
PITG_17507
PITG_22323
PITG_03799
PITG_03101
PITG_10007
PITG_17748
PITG_01062
PITG_07269
PITG_01255

## Sheet: Table S8G
The synergistic DEGs in the GO terms of peptide biosynthetic process
					log2FoldChange
Total DEGs in peptide biosynthetic process			Synergistic DEGs in peptide biosynthetic process	description	AZD	RAP	RAP+AZD	sort	peptide biosynthetic process					down	up
Novel01571			PITG_22657	Elongation factor 1-alpha, putative [Source:UniProtKB/TrEMBL;Acc:D0RMQ3]	-1.6992	-0.96753	-5.7348	1	ratio of synergistic DEGs				Number of synergistic DEGs	133	10
PITG_03597			PITG_12483	Eukaryotic translation initiation factor 3, putative [Source:UniProtKB/TrEMBL;Acc:D0NKM5]	-1.2917	-0.42801	-3.3137	2	0.525735				ratio	0.93007	0.0699301
PITG_10167			PITG_08714	Lysyl-tRNA synthetase [Source:UniProtKB/TrEMBL;Acc:D0ND10]	-1.2619	-0.88598	-3.2316	3
PITG_04337			PITG_09289	Eukaryotic translation initiation factor 3 subunit F, putative [Source:UniProtKB/TrEMBL;Acc:D0NBC1]	-1.2027	0	-3.0527	4
PITG_10516			PITG_21661	Eukaryotic initiation factor 4E, putative [Source:UniProtKB/TrEMBL;Acc:D0P4I3]	-1.0515	0	-2.9639	5
PITG_19780			PITG_15810	Eukaryotic translation initiation factor 3 subunit A, putative [Source:UniProtKB/TrEMBL;Acc:D0NS65]	-1.5158	-0.97845	-2.8702	6
PITG_03093			PITG_06596	Putative uncharacterized protein [Source:UniProtKB/TrEMBL;Acc:D0N578]	-1.2658	-0.18773	-2.8435	7
PITG_22715			PITG_04640	Elongation factor 1-alpha [Source:UniProtKB/TrEMBL;Acc:D0N1P5]	-1.2968	-0.45835	-2.8183	8
PITG_04747			PITG_17607	Elongation factor Ts, putative [Source:UniProtKB/TrEMBL;Acc:D0NWT0]	-1.1313	-0.82207	-2.8034	9
PITG_19679			PITG_06722	Elongation factor 1-alpha [Source:UniProtKB/TrEMBL;Acc:D0N1P5]	-1.1361	-0.32418	-2.7202	10
PITG_21503			PITG_11110	Eukaryotic translation initiation factor 2 subunit 3 [Source:UniProtKB/TrEMBL;Acc:D0NG72]	-1.1459	-0.32197	-2.7137	11
Novel01230			PITG_10110	Alanyl-tRNA synthetase [Source:UniProtKB/TrEMBL;Acc:D0NEB9]	-0.64546	-1.2793	-2.6635	12
PITG_18882			PITG_21393	Eukaryotic translation initiation factor 3 subunit A, putative [Source:UniProtKB/TrEMBL;Acc:D0P3U0]	-1.3358	-0.703	-2.6271	13
Novel00922			PITG_18054	50S ribosomal protein L7/L12, putative [Source:UniProtKB/TrEMBL;Acc:D0NY31]	-0.9877	-0.15493	-2.5731	14
Novel01095			PITG_20689	Eukaryotic translation initiation factor 3 subunit H, putative [Source:UniProtKB/TrEMBL;Acc:D0P2T1]	-1.0841	-0.18083	-2.5491	15
PITG_11468			PITG_03768	50S ribosomal protein L4 [Source:UniProtKB/TrEMBL;Acc:D0MYG7]	-1.0332	-0.22317	-2.5447	16
PITG_11728			PITG_10916	Eukaryotic translation initiation factor 3, putative [Source:UniProtKB/TrEMBL;Acc:D0NHD9]	-1.095	-0.18977	-2.5358	17
PITG_17651			PITG_16915	Elongation factor Tu [Source:UniProtKB/TrEMBL;Acc:D0NUD9]	-1.0946	-0.11743	-2.5053	18
PITG_03660			PITG_00397	Eukaryotic translation initiation factor 3 subunit C, putative [Source:UniProtKB/TrEMBL;Acc:D0MQP5]	-1.1807	-0.18108	-2.46	19
PITG_00401			PITG_08548	50S ribosomal protein L33 [Source:UniProtKB/TrEMBL;Acc:D0NAW1]	-1.3863	-0.39198	-2.4312	20
PITG_00388			PITG_02039	EF-1 guanine nucleotide exchange domain-containing protein, putative [Source:UniProtKB/TrEMBL;Acc:D0MUQ6]	-0.92228	-0.33696	-2.4118	21
Novel00907			PITG_09525	Ribosomal protein L23, putative [Source:UniProtKB/TrEMBL;Acc:D0NC72]	-1.2178	-0.24398	-2.3598	22
PITG_19121			PITG_00910	EF-1 guanine nucleotide exchange domain-containing protein, putative [Source:UniProtKB/TrEMBL;Acc:D0MRZ7]	-1.1313	-0.36958	-2.328	23
Novel00167			PITG_06482	Eukaryotic translation initiation factor 3 subunit, putative [Source:UniProtKB/TrEMBL;Acc:D0N4Y5]	-1.1719	-0.56119	-2.3223	24
PITG_17009			PITG_09521	Putative uncharacterized protein [Source:UniProtKB/TrEMBL;Acc:D0NC68]	-0.96955	0	-2.3156	25
Novel01157			PITG_17785	Putative uncharacterized protein [Source:UniProtKB/TrEMBL;Acc:D0NW97]	-1.2918	-0.6026	-2.3098	26
PITG_11630			PITG_06821	Eukaryotic initiation factor 4E, putative [Source:UniProtKB/TrEMBL;Acc:D0N871]	-1.0503	0	-2.2649	27
PITG_14577			PITG_10941	Elongation factor 2 [Source:UniProtKB/TrEMBL;Acc:D0NFT2]	-1.0571	-0.30619	-2.2292	28
PITG_06911			PITG_12193	Ribosomal protein [Source:UniProtKB/TrEMBL;Acc:D0NJ99]	-0.99172	-0.27516	-2.2273	29
PITG_11734			PITG_14729	30S ribosomal protein S16, putative [Source:UniProtKB/TrEMBL;Acc:D0NQY6]	-1.2669	0	-2.208	30
PITG_15069			PITG_20798	Ribosomal protein S17, putative [Source:UniProtKB/TrEMBL;Acc:D0P2Q7]	-1.1589	-0.49495	-2.1841	31
PITG_21886			PITG_03420	50S ribosomal protein L13 [Source:UniProtKB/TrEMBL;Acc:D0N078]	-1.2542	-0.17443	-2.1718	32
PITG_12483			PITG_00523	Putative uncharacterized protein [Source:UniProtKB/TrEMBL;Acc:D0MR09]	-1.1632	-0.34026	-2.159	33
PITG_14456			PITG_03993	Eukaryotic translation initiation factor 3 subunit H, putative [Source:UniProtKB/TrEMBL;Acc:D0MZ23]	-0.92775	-0.1943	-2.1495	34
PITG_09540			PITG_09631	Putative uncharacterized protein [Source:UniProtKB/TrEMBL;Acc:D0NCG0]	-0.88021	-0.27741	-2.1393	35
PITG_08714			PITG_20116	50S ribosomal protein L15 [Source:UniProtKB/TrEMBL;Acc:D0P1Y0]	-0.70509	0	-2.1278	36
PITG_20386			PITG_13831	Tryptophanyl-tRNA synthetase [Source:UniProtKB/TrEMBL;Acc:D0NMW4]	-0.91553	-0.56582	-2.0947	37
PITG_17205			PITG_00302	Phenylalanyl-tRNA synthetase beta chain [Source:UniProtKB/TrEMBL;Acc:D0MQG5]	-1.0358	-0.50621	-2.0847	38
PITG_02694			PITG_06636	Putative uncharacterized protein [Source:UniProtKB/TrEMBL;Acc:D0N5B1]	-0.82566	-0.31728	-2.083	39
PITG_09627			PITG_18018	Ribosome-recycling factor, putative [Source:UniProtKB/TrEMBL;Acc:D0NXI7]	-0.91946	-0.45906	-2.0647	40
PITG_16556			PITG_19157	Ribosomal protein L36 [Source:UniProtKB/TrEMBL;Acc:D0NYZ3]	-0.8198	-0.54308	-2.0455	41
PITG_09525			PITG_03460	Seryl-tRNA synthetase [Source:UniProtKB/TrEMBL;Acc:D0N0B6]	-0.90313	-0.53661	-2.0425	42
PITG_05058			PITG_21886	Histidyl-tRNA synthetase [Source:UniProtKB/TrEMBL;Acc:D0RLR0]	-0.91313	-0.13918	-2.0217	43
PITG_03978			PITG_03661	Cysteinyl-tRNA synthetase, putative [Source:UniProtKB/TrEMBL;Acc:D0MY71]	-1.0768	-0.48564	-2.0065	44
PITG_15566			PITG_19531	50S ribosomal protein L25, putative [Source:UniProtKB/TrEMBL;Acc:D0P070]	-0.86799	-0.39807	-2.003	45
PITG_12947			PITG_21010	Eukaryotic translation initiation factor 3 subunit, putative [Source:UniProtKB/TrEMBL;Acc:D0P366]	-1.0674	-0.27182	-1.9891	46
PITG_07173			PITG_14608	39S ribosomal protein L24, mitochondrial, putative [Source:UniProtKB/TrEMBL;Acc:D0NQP0]	-1.1228	-0.32652	-1.988	47
PITG_06799			PITG_13174	Translation initiation factor IF-2, putative [Source:UniProtKB/TrEMBL;Acc:D0NJS1]	-0.89001	-0.49246	-1.9582	48
PITG_02053			PITG_05174	50S ribosomal protein L35 [Source:UniProtKB/TrEMBL;Acc:D0N3Q4]	-1.0871	-0.32161	-1.9526	49
PITG_03768			PITG_20386	Eukaryotic translation initiation factor 5B [Source:UniProtKB/TrEMBL;Acc:D0P1T1]	-0.95635	-0.10644	-1.9099	50
PITG_00631			PITG_04382	50S ribosomal protein L27 [Source:UniProtKB/TrEMBL;Acc:D0N152]	-0.92557	-0.2457	-1.8597	51
PITG_16741			PITG_19551	Putative uncharacterized protein [Source:UniProtKB/TrEMBL;Acc:D0P0B2]	-1.0484	-0.38596	-1.8587	52
PITG_01217			PITG_08100	Elongation factor G, putative [Source:UniProtKB/TrEMBL;Acc:D0N9G7]	-0.88358	0	-1.8334	53
PITG_20798			PITG_08579	Isoleucyl-tRNA synthetase [Source:UniProtKB/TrEMBL;Acc:D0NAY8]	-0.86591	-0.3614	-1.8248	54
PITG_04918			PITG_09627	Ribosomal protein L23, putative [Source:UniProtKB/TrEMBL;Acc:D0NCF6]	-0.95503	-0.38538	-1.8208	55
PITG_06771			PITG_17240	Eukaryotic translation initiation factor 3 subunit E-interacting protein, putative [Source:UniProtKB/TrEMBL;Acc:D0NVK9]	-0.98526	-0.27186	-1.8079	56
PITG_09506			PITG_06819	Transcription elongation factor, putative [Source:UniProtKB/TrEMBL;Acc:D0N869]	-0.85782	-0.23245	-1.8036	57
PITG_09234			PITG_01217	Transmembrane protein, putative [Source:UniProtKB/TrEMBL;Acc:D0MUX9]	-0.57408	0	-1.8031	58
PITG_01041			PITG_12697	30S ribosomal protein S9 [Source:UniProtKB/TrEMBL;Acc:D0NKZ4]	-0.9168	-0.4886	-1.7577	59
PITG_08681			PITG_09234	Cysteinyl-tRNA synthetase, putative [Source:UniProtKB/TrEMBL;Acc:D0NB70]	-0.74214	-0.4484	-1.7413	60
PITG_00397			PITG_07141	Methionyl-tRNA synthetase, putative [Source:UniProtKB/TrEMBL;Acc:D0N7D5]	-0.78385	-0.61108	-1.7312	61
PITG_22020			PITG_09932	Translation initiation factor eIF-2B subunit epsilon, putative [Source:UniProtKB/TrEMBL;Acc:D0NDW0]	-0.7775	-0.36378	-1.7247	62
PITG_09932			PITG_18518	Translation initiation factor eIF-2B subunit alpha, putative [Source:UniProtKB/TrEMBL;Acc:D0NY85]	-0.64976	-0.49144	-1.7063	63
PITG_03221			PITG_09506	30S ribosomal protein S5, putative [Source:UniProtKB/TrEMBL;Acc:D0NC61]	-0.73227	-0.14804	-1.6866	64
PITG_03762			PITG_04992	Arginyl-tRNA synthetase, putative [Source:UniProtKB/TrEMBL;Acc:D0N2I8]	-0.68161	-0.54612	-1.6697	65
PITG_19999			PITG_19448	50S ribosomal protein L17, putative [Source:UniProtKB/TrEMBL;Acc:D0P085]	-0.86568	-0.32929	-1.6664	66
PITG_03398			PITG_04487	Putative uncharacterized protein [Source:UniProtKB/TrEMBL;Acc:D0N1D6]	-0.97611	0	-1.6543	67
PITG_12077			PITG_01184	Eukaryotic translation initiation factor 3 subunit G [Source:UniProtKB/TrEMBL;Acc:D0MUU9]	-0.81998	-0.26479	-1.6435	68
PITG_22135			PITG_07885	Eukaryotic translation initiation factor 2 subunit alpha [Source:UniProtKB/TrEMBL;Acc:D0NA23]	-0.79609	-0.27465	-1.5433	69
PITG_05733			PITG_12535	Eukaryotic peptide chain release factor subunit 1 [Source:UniProtKB/TrEMBL;Acc:D0NKS2]	-0.48442	0	-1.5366	70
PITG_05694			PITG_09555	Ubiquitin-ribosomal fusion protein, putative [Source:UniProtKB/TrEMBL;Acc:D0NC98]	-0.22447	0	-1.5175	71
PITG_14557			PITG_17733	Putative uncharacterized protein [Source:UniProtKB/TrEMBL;Acc:D0NYJ6]	-1.1471	0	-1.4783	72
PITG_13735			PITG_04703	Putative uncharacterized protein [Source:UniProtKB/TrEMBL;Acc:D0N1U9]	0	0	-1.4467	73
PITG_05171			PITG_15393	Eukaryotic translation initiation factor, putative [Source:UniProtKB/TrEMBL;Acc:D0NR52]	-0.93412	0	-1.424	74
PITG_09846			PITG_15566	RNA polymerase I-specific transcription initiation factor rrn3, putative [Source:UniProtKB/TrEMBL;Acc:D0NT31]	-0.86299	0	-1.4125	75
PITG_07141			PITG_06222	Lysyl-tRNA synthetase [Source:UniProtKB/TrEMBL;Acc:D0N4C9]	-0.97682	-0.58309	-1.4098	76
PITG_07234			PITG_05301	Translation elongation factor 1-alpha, putative [Source:UniProtKB/TrEMBL;Acc:D0N412]	-0.8723	-0.25151	-1.3911	77
PITG_03274			PITG_20264	40S ribosomal protein S13 [Source:UniProtKB/TrEMBL;Acc:D0P2D2]	-0.33591	0	-1.3727	78
PITG_14278			PITG_07888	Putative uncharacterized protein [Source:UniProtKB/TrEMBL;Acc:D0NA26]	-0.54765	-0.42945	-1.3691	79
PITG_00302			PITG_01255	Eukaryotic translation initiation factor 5, putative [Source:UniProtKB/TrEMBL;Acc:D0MV15]	-1.1785	0	-1.3655	80
PITG_18251			PITG_01762	Glycyl-tRNA synthetase [Source:UniProtKB/TrEMBL;Acc:D0MU13]	-0.58006	-0.4974	-1.3627	81
PITG_05009			PITG_03915	Glutamyl-tRNA(Gln) amidotransferase subunit, putative [Source:UniProtKB/TrEMBL;Acc:D0MYV2]	-0.66629	-0.61865	-1.3601	82
PITG_04382			PITG_07797	Methionyl-tRNA synthetase, putative [Source:UniProtKB/TrEMBL;Acc:D0N9U7]	-1.0129	-0.41747	-1.3564	83
PITG_06995			PITG_12864	Asparaginyl-tRNA synthetase [Source:UniProtKB/TrEMBL;Acc:D0NLB9]	-0.7031	-0.3715	-1.3547	84
PITG_11923			PITG_21071	Threonyl-tRNA synthetase [Source:UniProtKB/TrEMBL;Acc:D0P3H8]	-0.68666	-0.5533	-1.3514	85
Novel01297			PITG_11923	Mitochondrial 39-S ribosomal protein L47, putative [Source:UniProtKB/TrEMBL;Acc:D0NHJ5]	-0.64229	-0.23256	-1.3263	86
PITG_01042			PITG_14456	Glutamyl-tRNA synthetase, putative [Source:UniProtKB/TrEMBL;Acc:D0NPW4]	-0.21598	-0.49551	-1.2961	87
PITG_09791			PITG_07841	Glycyl-tRNA synthetase [Source:UniProtKB/TrEMBL;Acc:D0N9Y4]	-0.56005	-0.32883	-1.2942	88
PITG_21010			PITG_19007	Putative uncharacterized protein [Source:UniProtKB/TrEMBL;Acc:D0NYR2]	-0.67136	-0.29684	-1.2805	89
PITG_17261			PITG_17748	Leucyl-tRNA synthetase, putative [Source:UniProtKB/TrEMBL;Acc:D0NWC3]	-0.72633	-0.5575	-1.2766	90
PITG_09442			PITG_03322	Prolyl-tRNA synthetase, putative [Source:UniProtKB/TrEMBL;Acc:D0MZY3]	-0.5176	-0.38046	-1.2652	91
PITG_20689			PITG_13600	Eukaryotic translation initiation factor 3 subunit, putative [Source:UniProtKB/TrEMBL;Acc:D0NMD0]	-0.95148	-0.18207	-1.2595	92
PITG_19531			PITG_10974	Elongation factor 1-gamma, putative [Source:UniProtKB/TrEMBL;Acc:D0NFV6]	-0.614	0	-1.2499	93
PITG_10146			PITG_11111	Leucyl-tRNA synthetase, cytoplasmic, putative [Source:UniProtKB/TrEMBL;Acc:D0NG73]	-0.70777	-0.3881	-1.2312	94
PITG_16328			PITG_20747	Transcription elongation factor B polypeptide 1 [Source:UniProtKB/TrEMBL;Acc:D0P2B1]	-0.59743	-0.37492	-1.2105	95
PITG_18052			PITG_05649	Glutamyl-tRNA synthetase, putative [Source:UniProtKB/TrEMBL;Acc:D0N3C3]	-0.51232	-0.2474	-1.1906	96
PITG_03993			PITG_01036	Phenylalanyl-tRNA synthetase alpha chain [Source:UniProtKB/TrEMBL;Acc:D0MSA5]	-0.61375	-0.31506	-1.1631	97
PITG_03460			PITG_04918	Alanyl-tRNA synthetase, putative [Source:UniProtKB/TrEMBL;Acc:D0N2D2]	-0.69176	-0.5114	-1.1455	98
PITG_20116			PITG_07839	Translation initiation factor eIF-2B subunit gamma, putative [Source:UniProtKB/TrEMBL;Acc:D0N9Y2]	-0.58883	-0.62268	-1.1373	99
PITG_22323			PITG_08369	Valyl-tRNA synthetase [Source:UniProtKB/TrEMBL;Acc:D0NAF6]	-0.56429	-0.50663	-1.1361	100
PITG_03799			PITG_07062	Aspartyl/glutamyl-tRNA(Asn/Gln) amidotransferase subunit B [Source:UniProtKB/TrEMBL;Acc:D0N761]	-0.54153	0	-1.1163	101
PITG_00443			PITG_12839	Putative uncharacterized protein [Source:UniProtKB/TrEMBL;Acc:D0NLA2]	-0.70264	0	-1.1057	102
PITG_17748			PITG_05405	Arginyl-tRNA synthetase, putative [Source:UniProtKB/TrEMBL;Acc:D0N2R1]	-0.73707	-0.12563	-1.0903	103
PITG_07269			PITG_12961	Alanyl-tRNA synthetase, mitochondrial [Source:UniProtKB/TrEMBL;Acc:D0NJY9]	-0.58518	-0.46856	-1.0755	104
PITG_01255			PITG_03274	Elongation factor P, putative [Source:UniProtKB/TrEMBL;Acc:D0MZT7]	-0.31637	0	-1.0278	105
PITG_21393			PITG_03916	Ribosomal protein L28, putative [Source:UniProtKB/TrEMBL;Acc:D0MYV3]	-0.50097	0	-1.0182	106
PITG_00179			PITG_14609	Eukaryotic translation initiation factor 2 subunit beta [Source:UniProtKB/TrEMBL;Acc:D0NQP1]	-0.49563	0	-1.004	107
PITG_10974			PITG_02580	Putative uncharacterized protein [Source:UniProtKB/TrEMBL;Acc:D0MWP7]	-0.48899	-0.30653	-0.99785	108
PITG_03294			PITG_05685	Transcription elongation factor SPT5, putative [Source:UniProtKB/TrEMBL;Acc:D0N3F8]	-0.4366	-0.64062	-0.97934	109
PITG_06505			PITG_10480	Translation initiation factor eIF-2B subunit beta, putative [Source:UniProtKB/TrEMBL;Acc:D0NFE8]	-0.60067	-0.22118	-0.96636	110
PITG_21661			PITG_05007	Glutaminyl-tRNA synthetase, putative [Source:UniProtKB/TrEMBL;Acc:D0N2K2]	-0.53463	-0.49427	-0.93455	111
PITG_05354			PITG_11734	50S ribosomal protein L3-2 [Source:UniProtKB/TrEMBL;Acc:D0NIF6]	-0.61828	-0.37503	-0.90332	112
PITG_10193			PITG_09846	Prolyl-tRNA synthetase, putative [Source:UniProtKB/TrEMBL;Acc:D0NEQ1]	-0.71201	-0.33624	-0.8988	113
PITG_17727			PITG_06440	Eukaryotic translation initiation factor 2A, putative [Source:UniProtKB/TrEMBL;Acc:D0N4V7]	-0.57598	-0.30852	-0.85579	114
PITG_04992			PITG_13735	Peptide chain release factor, putative [Source:UniProtKB/TrEMBL;Acc:D0NMN6]	0	-0.46456	-0.85287	115
PITG_05301			PITG_16669	Transcription factor IIIB, putative [Source:UniProtKB/TrEMBL;Acc:D0NVC1]	-0.2869	0	-0.83773	116
PITG_08834			PITG_16328	Tyrosyl-tRNA synthetase, putative [Source:UniProtKB/TrEMBL;Acc:D0NU10]	-0.51657	-0.2874	-0.83672	117
PITG_13676			PITG_16023	Transcription initiation factor TFIID subunit, putative [Source:UniProtKB/TrEMBL;Acc:D0NSP2]	-0.24365	-0.41116	-0.83655	118
PITG_14668			PITG_18251	Peptide chain release factor 1 [Source:UniProtKB/TrEMBL;Acc:D0NXQ3]	0	0	-0.81945	119
PITG_09866			PITG_14668	Transcription initiation factor TFIID subunit, putative [Source:UniProtKB/TrEMBL;Acc:D0NQT7]	0	0	-0.79753	120
PITG_09563			PITG_16741	Isoleucyl-tRNA synthetase [Source:UniProtKB/TrEMBL;Acc:D0NVI3]	-0.58419	-0.17087	-0.79262	121
PITG_20189			PITG_10979	Elongation factor 1-gamma, putative [Source:UniProtKB/TrEMBL;Acc:D0NFW0]	-0.34144	0	-0.78455	122
PITG_04487			Novel00866	0	0	0	-0.76289	123
PITG_17240			PITG_12151	Aspartyl-tRNA synthetase, putative [Source:UniProtKB/TrEMBL;Acc:D0NJ60]	-0.44308	-0.36927	-0.75668	124
PITG_05405			PITG_14278	Eukaryotic translation initiation factor 4 gamma, putative [Source:UniProtKB/TrEMBL;Acc:D0NP07]	-0.42632	-0.33942	-0.73901	125
PITG_04640			PITG_05733	Glutathione gamma-glutamylcysteinyltransferase, putative [Source:UniProtKB/TrEMBL;Acc:D0N5J9]	-0.34588	0	-0.70022	126
PITG_10979			PITG_05354	Asparaginyl-tRNA synthetase [Source:UniProtKB/TrEMBL;Acc:D0N451]	-0.23142	0	-0.69225	127
PITG_09631			PITG_03799	Eukaryotic initiation factor 4E, putative [Source:UniProtKB/TrEMBL;Acc:D0MYJ6]	-0.32848	0	-0.67693	128
PITG_16757			PITG_14557	Putative uncharacterized protein [Source:UniProtKB/TrEMBL;Acc:D0NQI9]	-0.43061	-0.51971	-0.61854	129
PITG_19007			PITG_09791	Seryl-tRNA synthetase [Source:UniProtKB/TrEMBL;Acc:D0NCU4]	-0.4731	-0.4012	-0.60692	130
PITG_06636			PITG_06505	Eukaryotic translation initiation factor 2-alpha kinase, putative [Source:UniProtKB/TrEMBL;Acc:D0N503]	0	0	-0.53696	131
PITG_09552			PITG_01756	Negative elongation factor, putative [Source:UniProtKB/TrEMBL;Acc:D0MU08]	-0.19698	0	-0.53357	132
PITG_10480			PITG_17727	Putative uncharacterized protein [Source:UniProtKB/TrEMBL;Acc:D0NYJ0]	0	0	-0.36567	133
PITG_01943			PITG_14577	Putative uncharacterized protein [Source:UniProtKB/TrEMBL;Acc:D0NQK9]	0	0	0.3078	134
PITG_01184			PITG_00388	Putative uncharacterized protein [Source:UniProtKB/TrEMBL;Acc:D0MQN6]	0.2722	0	0.44661	135
PITG_06821			PITG_11468	Peptide deformylase, putative [Source:UniProtKB/TrEMBL;Acc:D0NIU8]	0	0	0.91298	136
PITG_02039			PITG_03660	60S ribosomal protein L6, putative [Source:UniProtKB/TrEMBL;Acc:D0MY70]	0.48466	0.81469	1.0347	137
PITG_10263			Novel01157	gag-pol fusion protein [Rhizophagus irregularis DAOM 197198w]	0.49607	1.1041	1.3414	138
PITG_19448			PITG_17009	Selenocysteine-specific elongation factor, putative [Source:UniProtKB/TrEMBL;Acc:D0NUK8]	0.27305	0.33139	1.4043	139
PITG_04703			PITG_19121	60S ribosomal protein L10 [Source:UniProtKB/TrEMBL;Acc:D0NYW1]	0.28971	0	1.4402	140
PITG_16669			PITG_17651	Putative uncharacterized protein [Source:UniProtKB/TrEMBL;Acc:D0NWJ6]	0	0	1.4785	141
PITG_01762			Novel01095	piggybac-derived 2 (agap012114-pa) [Nosema apis BRL 01]	0.73911	1.2883	1.7604	142
PITG_09289			Novel00907	hypothetical protein PHACADRAFT_58702, partial [Phanerochaete carnosa HHB-10118-sp]>gi|409038381|gb|EKM48439.1| hypothetical protein PHACADRAFT_58702, partial [Phanerochaete carnosa HHB-10118-sp]	1.2719	0	2.9959	143
PITG_20188
PITG_18018
PITG_02992
PITG_16008
PITG_13681
PITG_13831
PITG_10863
PITG_14596
PITG_13600
PITG_16023
PITG_14850
PITG_03420
PITG_06722
PITG_08100
PITG_11110
PITG_05174
PITG_15697
PITG_06440
Novel00015
PITG_03802
PITG_10916
PITG_07991
PITG_05649
PITG_10202
PITG_13500
PITG_17093
PITG_07797
PITG_12524
PITG_15090
PITG_01756
PITG_16915
PITG_03661
PITG_13371
PITG_03712
PITG_13174
PITG_03915
PITG_06048
PITG_02921
PITG_04774
PITG_19157
PITG_08959
PITG_02580
Novel00841
PITG_17607
PITG_14044
PITG_20264
PITG_05781
PITG_03322
PITG_15723
PITG_17785
PITG_03956
PITG_07885
PITG_06222
PITG_02547
PITG_14729
PITG_06482
PITG_03178
PITG_11111
PITG_05007
PITG_07888
PITG_11099
PITG_12151
PITG_04843
PITG_17153
PITG_13607
PITG_08579
PITG_09345
PITG_03239
PITG_15393
PITG_15407
PITG_12745
PITG_20747
PITG_19551
PITG_01036
PITG_07839
PITG_03399
PITG_00523
PITG_06237
PITG_19669
PITG_18518
PITG_14609
PITG_05685
PITG_01922
PITG_14608
PITG_08809
PITG_00910
PITG_12961
PITG_08548
PITG_12193
PITG_07300
PITG_20795
PITG_21071
Novel00866
PITG_19280
PITG_06819
PITG_03916
PITG_18054
PITG_11766
PITG_03486
PITG_10941
PITG_12839
PITG_00941
PITG_03353
PITG_08703
PITG_08369
PITG_07062
PITG_09555
PITG_17733
PITG_04729
PITG_10110
PITG_11560
PITG_16198
PITG_12697
PITG_02578
PITG_12864
PITG_04334
PITG_12535
PITG_15638
PITG_06596
PITG_03999
PITG_03235
PITG_03480
PITG_10887
PITG_01833
PITG_07841
PITG_14913
PITG_22657
PITG_15810
PITG_09521

## Sheet: Table S8H
The synergistic DEGs in the GO terms of peptide metabolic process
				log2FoldChange
Total DEGs in peptide metabolic process			Synergistic DEGs in peptide metabolic process	AZD	RAP	RAP+AZD		peptide metabolic process					down	up
Novel01571			PITG_22657	-1.6992	-0.96753	-5.7348		ratio of synergistic DEGs				Number of synergistic DEGs	141	10
PITG_04337			PITG_12483	-1.2917	-0.42801	-3.3137		0.537367				ratio	0.933775	0.0662252
PITG_03597			PITG_08714	-1.2619	-0.88598	-3.2316
PITG_10167			PITG_09289	-1.2027	0	-3.0527
PITG_10516			PITG_21661	-1.0515	0	-2.9639
PITG_19780			PITG_15810	-1.5158	-0.97845	-2.8702
PITG_21503			PITG_06596	-1.2658	-0.18773	-2.8435
Novel00981			PITG_04640	-1.2968	-0.45835	-2.8183
PITG_19679			PITG_17607	-1.1313	-0.82207	-2.8034
PITG_03093			PITG_06722	-1.1361	-0.32418	-2.7202
PITG_22715			PITG_11110	-1.1459	-0.32197	-2.7137
PITG_04747			PITG_10110	-0.64546	-1.2793	-2.6635
PITG_18882			PITG_21393	-1.3358	-0.703	-2.6271
Novel01230			PITG_18054	-0.9877	-0.15493	-2.5731
Novel00907			PITG_20689	-1.0841	-0.18083	-2.5491
PITG_00388			PITG_03768	-1.0332	-0.22317	-2.5447
PITG_00401			PITG_10916	-1.095	-0.18977	-2.5358
PITG_11468			PITG_16915	-1.0946	-0.11743	-2.5053
Novel01095			PITG_00397	-1.1807	-0.18108	-2.46
PITG_11728			PITG_08548	-1.3863	-0.39198	-2.4312
Novel00922			PITG_02039	-0.92228	-0.33696	-2.4118
PITG_03660			PITG_09525	-1.2178	-0.24398	-2.3598
PITG_17651			PITG_00910	-1.1313	-0.36958	-2.328
Novel01157			PITG_06482	-1.1719	-0.56119	-2.3223
PITG_11630			PITG_09521	-0.96955	0	-2.3156
PITG_06911			PITG_17785	-1.2918	-0.6026	-2.3098
PITG_14577			PITG_06821	-1.0503	0	-2.2649
PITG_19121			PITG_10941	-1.0571	-0.30619	-2.2292
Novel00167			PITG_12193	-0.99172	-0.27516	-2.2273
PITG_17009			PITG_14729	-1.2669	0	-2.208
PITG_09866			PITG_20798	-1.1589	-0.49495	-2.1841
PITG_14668			PITG_03420	-1.2542	-0.17443	-2.1718
PITG_13676			PITG_00523	-1.1632	-0.34026	-2.159
PITG_08834			PITG_03993	-0.92775	-0.1943	-2.1495
PITG_04992			PITG_09631	-0.88021	-0.27741	-2.1393
PITG_05301			PITG_20116	-0.70509	0	-2.1278
PITG_04640			PITG_13831	-0.91553	-0.56582	-2.0947
PITG_05405			PITG_00302	-1.0358	-0.50621	-2.0847
PITG_10979			PITG_06636	-0.82566	-0.31728	-2.083
PITG_17240			PITG_18018	-0.91946	-0.45906	-2.0647
PITG_09563			PITG_19157	-0.8198	-0.54308	-2.0455
PITG_04487			PITG_03460	-0.90313	-0.53661	-2.0425
PITG_20189			PITG_21886	-0.91313	-0.13918	-2.0217
PITG_00443			PITG_03661	-1.0768	-0.48564	-2.0065
PITG_17748			PITG_19531	-0.86799	-0.39807	-2.003
PITG_01255			PITG_21010	-1.0674	-0.27182	-1.9891
PITG_07269			PITG_14608	-1.1228	-0.32652	-1.988
PITG_03799			PITG_13174	-0.89001	-0.49246	-1.9582
PITG_22323			PITG_05174	-1.0871	-0.32161	-1.9526
PITG_20116			PITG_20386	-0.95635	-0.10644	-1.9099
PITG_03460			PITG_04382	-0.92557	-0.2457	-1.8597
PITG_03993			PITG_19551	-1.0484	-0.38596	-1.8587
PITG_10146			PITG_08100	-0.88358	0	-1.8334
PITG_18052			PITG_08579	-0.86591	-0.3614	-1.8248
PITG_16328			PITG_09627	-0.95503	-0.38538	-1.8208
PITG_10193			PITG_17240	-0.98526	-0.27186	-1.8079
PITG_05354			PITG_06819	-0.85782	-0.23245	-1.8036
PITG_17727			PITG_01217	-0.57408	0	-1.8031
PITG_03294			PITG_12697	-0.9168	-0.4886	-1.7577
PITG_06505			PITG_09234	-0.74214	-0.4484	-1.7413
PITG_21661			PITG_07141	-0.78385	-0.61108	-1.7312
PITG_10974			PITG_09932	-0.7775	-0.36378	-1.7247
PITG_21393			PITG_18518	-0.64976	-0.49144	-1.7063
PITG_00179			PITG_09506	-0.73227	-0.14804	-1.6866
PITG_10863			PITG_04992	-0.68161	-0.54612	-1.6697
PITG_13600			PITG_19448	-0.86568	-0.32929	-1.6664
PITG_16023			PITG_04487	-0.97611	0	-1.6543
PITG_14596			PITG_01184	-0.81998	-0.26479	-1.6435
PITG_16008			PITG_07885	-0.79609	-0.27465	-1.5433
PITG_13681			PITG_12535	-0.48442	0	-1.5366
PITG_13831			PITG_09555	-0.22447	0	-1.5175
PITG_18018			PITG_17733	-1.1471	0	-1.4783
PITG_20188			PITG_05628	-0.38117	-0.22428	-1.4779
PITG_02992			PITG_04703	0	0	-1.4467
PITG_09289			PITG_15393	-0.93412	0	-1.424
PITG_01762			PITG_15566	-0.86299	0	-1.4125
PITG_15697			PITG_06222	-0.97682	-0.58309	-1.4098
PITG_05174			PITG_05301	-0.8723	-0.25151	-1.3911
PITG_08100			PITG_20264	-0.33591	0	-1.3727
PITG_06722			PITG_07888	-0.54765	-0.42945	-1.3691
PITG_11110			PITG_01255	-1.1785	0	-1.3655
PITG_03420			PITG_01762	-0.58006	-0.4974	-1.3627
PITG_14850			PITG_03915	-0.66629	-0.61865	-1.3601
PITG_01580			PITG_07797	-1.0129	-0.41747	-1.3564
PITG_10480			PITG_12864	-0.7031	-0.3715	-1.3547
PITG_09552			PITG_21071	-0.68666	-0.5533	-1.3514
PITG_06636			PITG_11923	-0.64229	-0.23256	-1.3263
PITG_19007			PITG_08206	-0.38881	0	-1.3171
PITG_09631			PITG_14456	-0.21598	-0.49551	-1.2961
PITG_16757			PITG_07841	-0.56005	-0.32883	-1.2942
PITG_19448			PITG_19007	-0.67136	-0.29684	-1.2805
PITG_16669			PITG_17748	-0.72633	-0.5575	-1.2766
PITG_04703			PITG_03322	-0.5176	-0.38046	-1.2652
PITG_10263			PITG_13600	-0.95148	-0.18207	-1.2595
PITG_02039			PITG_10974	-0.614	0	-1.2499
PITG_06821			PITG_11111	-0.70777	-0.3881	-1.2312
PITG_01184			PITG_20747	-0.59743	-0.37492	-1.2105
PITG_01943			PITG_05649	-0.51232	-0.2474	-1.1906
PITG_04918			PITG_01036	-0.61375	-0.31506	-1.1631
PITG_20798			PITG_04918	-0.69176	-0.5114	-1.1455
PITG_01217			PITG_07839	-0.58883	-0.62268	-1.1373
PITG_03768			PITG_08369	-0.56429	-0.50663	-1.1361
PITG_00631			PITG_07062	-0.54153	0	-1.1163
PITG_16741			PITG_12839	-0.70264	0	-1.1057
PITG_12947			PITG_05405	-0.73707	-0.12563	-1.0903
PITG_15566			PITG_12961	-0.58518	-0.46856	-1.0755
PITG_03978			PITG_03274	-0.31637	0	-1.0278
PITG_05058			PITG_03916	-0.50097	0	-1.0182
PITG_02053			PITG_14609	-0.49563	0	-1.004
PITG_06799			PITG_02580	-0.48899	-0.30653	-0.99785
PITG_07173			PITG_05685	-0.4366	-0.64062	-0.97934
PITG_22020			PITG_10480	-0.60067	-0.22118	-0.96636
PITG_00397			PITG_05007	-0.53463	-0.49427	-0.93455
PITG_09932			PITG_00754	0	0	-0.92261
PITG_01041			PITG_11734	-0.61828	-0.37503	-0.90332
PITG_09234			PITG_09846	-0.71201	-0.33624	-0.8988
PITG_06771			PITG_17929	-0.18498	-0.1984	-0.85979
PITG_09506			PITG_14083	-0.49737	-0.72094	-0.85658
PITG_08681			PITG_06440	-0.57598	-0.30852	-0.85579
PITG_17929			PITG_13735	0	-0.46456	-0.85287
PITG_08714			PITG_16669	-0.2869	0	-0.83773
PITG_09540			PITG_16328	-0.51657	-0.2874	-0.83672
PITG_14456			PITG_16023	-0.24365	-0.41116	-0.83655
PITG_12483			PITG_18251	0	0	-0.81945
PITG_21886			PITG_13427	-0.37195	-0.14605	-0.81118
PITG_11734			PITG_14668	0	0	-0.79753
PITG_15069			PITG_16741	-0.58419	-0.17087	-0.79262
PITG_09627			PITG_10979	-0.34144	0	-0.78455
PITG_16556			Novel00866	0	0	-0.76289
PITG_02694			PITG_12151	-0.44308	-0.36927	-0.75668
PITG_09525			PITG_14278	-0.42632	-0.33942	-0.73901
PITG_00754			PITG_05733	-0.34588	0	-0.70022
PITG_20386			PITG_05354	-0.23142	0	-0.69225
PITG_17205			PITG_03799	-0.32848	0	-0.67693
PITG_09791			PITG_00757	-0.42121	0	-0.63305
PITG_01042			PITG_14557	-0.43061	-0.51971	-0.61854
Novel01297			PITG_09791	-0.4731	-0.4012	-0.60692
PITG_11923			PITG_01580	-0.33155	-0.20362	-0.5662
PITG_06995			PITG_06505	0	0	-0.53696
PITG_05009			PITG_01756	-0.19698	0	-0.53357
PITG_18251			PITG_17727	0	0	-0.36567
PITG_04382			PITG_14577	0	0	0.3078
PITG_19531			PITG_00388	0.2722	0	0.44661
PITG_17261			PITG_11468	0	0	0.91298
PITG_20689			PITG_03660	0.48466	0.81469	1.0347
PITG_09442			Novel01157	0.49607	1.1041	1.3414
PITG_21010			PITG_17009	0.27305	0.33139	1.4043
PITG_00757			PITG_19121	0.28971	0	1.4402
PITG_03398			PITG_17651	0	0	1.4785
PITG_12077			Novel01095	0.73911	1.2883	1.7604
PITG_03762			Novel00907	1.2719	0	2.9959
PITG_19999
PITG_03221
PITG_14278
PITG_03274
PITG_00302
PITG_09846
PITG_07234
PITG_07141
PITG_08206
PITG_05171
PITG_13735
PITG_22135
PITG_05694
PITG_05733
PITG_14557
PITG_03916
PITG_18054
PITG_19280
PITG_06819
PITG_21071
PITG_20795
PITG_07300
Novel00866
PITG_08548
PITG_12193
PITG_10941
PITG_12839
PITG_00941
PITG_03486
PITG_11766
PITG_00523
PITG_03399
PITG_07839
PITG_01036
PITG_20747
PITG_19551
PITG_00910
PITG_08809
PITG_12961
PITG_14609
PITG_18518
PITG_01922
PITG_14608
PITG_05685
PITG_19669
PITG_06237
PITG_22657
PITG_07841
PITG_01833
PITG_10887
PITG_14913
PITG_03999
PITG_03235
PITG_03480
PITG_12535
PITG_15638
PITG_12864
PITG_04334
PITG_06596
PITG_09521
PITG_15810
PITG_17733
PITG_09555
PITG_07062
PITG_08703
PITG_08369
PITG_03353
PITG_16198
PITG_12697
PITG_02578
PITG_11560
PITG_04729
PITG_10110
Novel00841
PITG_02580
PITG_08959
PITG_19157
PITG_04774
PITG_02921
PITG_03915
PITG_06048
PITG_13427
PITG_05781
PITG_20264
PITG_03322
PITG_14044
PITG_17607
PITG_05649
PITG_03802
PITG_10916
PITG_07991
Novel00015
PITG_05628
PITG_06440
PITG_03712
PITG_13174
PITG_16915
PITG_01756
PITG_13371
PITG_03661
PITG_07797
PITG_12524
PITG_17093
PITG_13500
PITG_15090
PITG_10202
PITG_12151
PITG_04843
PITG_17153
PITG_13607
PITG_08579
PITG_07888
PITG_05007
PITG_11099
PITG_06482
PITG_03178
PITG_11111
PITG_12745
PITG_03239
PITG_14083
PITG_15407
PITG_15393
PITG_09345
PITG_07885
PITG_15723
PITG_03956
PITG_17785
PITG_14729
PITG_02547
PITG_06222

## Sheet: Table S8I
The synergistic DEGs in the GO terms of translation
					log2FoldChange
Total DEGs in translation			Synergistic DEGs in translation	description	AZD	RAP	RAP+AZD	sort		translation				down	up
PITG_03597			PITG_22657	Elongation factor 1-alpha, putative [Source:UniProtKB/TrEMBL;Acc:D0RMQ3]	-1.6992	-0.96753	-5.7348	1		ratio of synergistic DEGs			Number of synergistic DEGs	131	10
PITG_04337			PITG_12483	Eukaryotic translation initiation factor 3, putative [Source:UniProtKB/TrEMBL;Acc:D0NKM5]	-1.2917	-0.42801	-3.3137	2		0.52809			ratio	0.929078	0.070922
PITG_10167			PITG_08714	Lysyl-tRNA synthetase [Source:UniProtKB/TrEMBL;Acc:D0ND10]	-1.2619	-0.88598	-3.2316	3
PITG_19780			PITG_09289	Eukaryotic translation initiation factor 3 subunit F, putative [Source:UniProtKB/TrEMBL;Acc:D0NBC1]	-1.2027	0	-3.0527	4
PITG_10516			PITG_21661	Eukaryotic initiation factor 4E, putative [Source:UniProtKB/TrEMBL;Acc:D0P4I3]	-1.0515	0	-2.9639	5
PITG_04747			PITG_15810	Eukaryotic translation initiation factor 3 subunit A, putative [Source:UniProtKB/TrEMBL;Acc:D0NS65]	-1.5158	-0.97845	-2.8702	6
PITG_22715			PITG_06596	Putative uncharacterized protein [Source:UniProtKB/TrEMBL;Acc:D0N578]	-1.2658	-0.18773	-2.8435	7
PITG_03093			PITG_04640	Elongation factor 1-alpha [Source:UniProtKB/TrEMBL;Acc:D0N1P5]	-1.2968	-0.45835	-2.8183	8
PITG_19679			PITG_17607	Elongation factor Ts, putative [Source:UniProtKB/TrEMBL;Acc:D0NWT0]	-1.1313	-0.82207	-2.8034	9
PITG_21503			PITG_06722	Elongation factor 1-alpha [Source:UniProtKB/TrEMBL;Acc:D0N1P5]	-1.1361	-0.32418	-2.7202	10
Novel01230			PITG_11110	Eukaryotic translation initiation factor 2 subunit 3 [Source:UniProtKB/TrEMBL;Acc:D0NG72]	-1.1459	-0.32197	-2.7137	11
PITG_18882			PITG_10110	Alanyl-tRNA synthetase [Source:UniProtKB/TrEMBL;Acc:D0NEB9]	-0.64546	-1.2793	-2.6635	12
PITG_03660			PITG_21393	Eukaryotic translation initiation factor 3 subunit A, putative [Source:UniProtKB/TrEMBL;Acc:D0P3U0]	-1.3358	-0.703	-2.6271	13
PITG_17009			PITG_18054	50S ribosomal protein L7/L12, putative [Source:UniProtKB/TrEMBL;Acc:D0NY31]	-0.9877	-0.15493	-2.5731	14
PITG_17651			PITG_20689	Eukaryotic translation initiation factor 3 subunit H, putative [Source:UniProtKB/TrEMBL;Acc:D0P2T1]	-1.0841	-0.18083	-2.5491	15
Novel00167			PITG_03768	50S ribosomal protein L4 [Source:UniProtKB/TrEMBL;Acc:D0MYG7]	-1.0332	-0.22317	-2.5447	16
PITG_11728			PITG_10916	Eukaryotic translation initiation factor 3, putative [Source:UniProtKB/TrEMBL;Acc:D0NHD9]	-1.095	-0.18977	-2.5358	17
PITG_19121			PITG_16915	Elongation factor Tu [Source:UniProtKB/TrEMBL;Acc:D0NUD9]	-1.0946	-0.11743	-2.5053	18
PITG_11468			PITG_00397	Eukaryotic translation initiation factor 3 subunit C, putative [Source:UniProtKB/TrEMBL;Acc:D0MQP5]	-1.1807	-0.18108	-2.46	19
Novel01095			PITG_08548	50S ribosomal protein L33 [Source:UniProtKB/TrEMBL;Acc:D0NAW1]	-1.3863	-0.39198	-2.4312	20
Novel00907			PITG_02039	EF-1 guanine nucleotide exchange domain-containing protein, putative [Source:UniProtKB/TrEMBL;Acc:D0MUQ6]	-0.92228	-0.33696	-2.4118	21
PITG_00388			PITG_09525	Ribosomal protein L23, putative [Source:UniProtKB/TrEMBL;Acc:D0NC72]	-1.2178	-0.24398	-2.3598	22
PITG_00401			PITG_00910	EF-1 guanine nucleotide exchange domain-containing protein, putative [Source:UniProtKB/TrEMBL;Acc:D0MRZ7]	-1.1313	-0.36958	-2.328	23
PITG_14577			PITG_06482	Eukaryotic translation initiation factor 3 subunit, putative [Source:UniProtKB/TrEMBL;Acc:D0N4Y5]	-1.1719	-0.56119	-2.3223	24
PITG_06911			PITG_09521	Putative uncharacterized protein [Source:UniProtKB/TrEMBL;Acc:D0NC68]	-0.96955	0	-2.3156	25
PITG_11630			PITG_17785	Putative uncharacterized protein [Source:UniProtKB/TrEMBL;Acc:D0NW97]	-1.2918	-0.6026	-2.3098	26
Novel01157			PITG_06821	Eukaryotic initiation factor 4E, putative [Source:UniProtKB/TrEMBL;Acc:D0N871]	-1.0503	0	-2.2649	27
PITG_12745			PITG_10941	Elongation factor 2 [Source:UniProtKB/TrEMBL;Acc:D0NFT2]	-1.0571	-0.30619	-2.2292	28
PITG_19531			PITG_12193	Ribosomal protein [Source:UniProtKB/TrEMBL;Acc:D0NJ99]	-0.99172	-0.27516	-2.2273	29
PITG_09345			PITG_14729	30S ribosomal protein S16, putative [Source:UniProtKB/TrEMBL;Acc:D0NQY6]	-1.2669	0	-2.208	30
PITG_21010			PITG_20798	Ribosomal protein S17, putative [Source:UniProtKB/TrEMBL;Acc:D0P2Q7]	-1.1589	-0.49495	-2.1841	31
PITG_15393			PITG_03420	50S ribosomal protein L13 [Source:UniProtKB/TrEMBL;Acc:D0N078]	-1.2542	-0.17443	-2.1718	32
PITG_15407			PITG_00523	Putative uncharacterized protein [Source:UniProtKB/TrEMBL;Acc:D0MR09]	-1.1632	-0.34026	-2.159	33
PITG_09442			PITG_03993	Eukaryotic translation initiation factor 3 subunit H, putative [Source:UniProtKB/TrEMBL;Acc:D0MZ23]	-0.92775	-0.1943	-2.1495	34
PITG_20689			PITG_09631	Putative uncharacterized protein [Source:UniProtKB/TrEMBL;Acc:D0NCG0]	-0.88021	-0.27741	-2.1393	35
PITG_03239			PITG_20116	50S ribosomal protein L15 [Source:UniProtKB/TrEMBL;Acc:D0P1Y0]	-0.70509	0	-2.1278	36
PITG_17261			PITG_13831	Tryptophanyl-tRNA synthetase [Source:UniProtKB/TrEMBL;Acc:D0NMW4]	-0.91553	-0.56582	-2.0947	37
PITG_11923			PITG_00302	Phenylalanyl-tRNA synthetase beta chain [Source:UniProtKB/TrEMBL;Acc:D0MQG5]	-1.0358	-0.50621	-2.0847	38
Novel01297			PITG_06636	Putative uncharacterized protein [Source:UniProtKB/TrEMBL;Acc:D0N5B1]	-0.82566	-0.31728	-2.083	39
PITG_11099			PITG_18018	Ribosome-recycling factor, putative [Source:UniProtKB/TrEMBL;Acc:D0NXI7]	-0.91946	-0.45906	-2.0647	40
PITG_05007			PITG_19157	Ribosomal protein L36 [Source:UniProtKB/TrEMBL;Acc:D0NYZ3]	-0.8198	-0.54308	-2.0455	41
PITG_07888			PITG_03460	Seryl-tRNA synthetase [Source:UniProtKB/TrEMBL;Acc:D0N0B6]	-0.90313	-0.53661	-2.0425	42
PITG_08579			PITG_21886	Histidyl-tRNA synthetase [Source:UniProtKB/TrEMBL;Acc:D0RLR0]	-0.91313	-0.13918	-2.0217	43
PITG_13607			PITG_03661	Cysteinyl-tRNA synthetase, putative [Source:UniProtKB/TrEMBL;Acc:D0MY71]	-1.0768	-0.48564	-2.0065	44
PITG_17153			PITG_19531	50S ribosomal protein L25, putative [Source:UniProtKB/TrEMBL;Acc:D0P070]	-0.86799	-0.39807	-2.003	45
PITG_09791			PITG_21010	Eukaryotic translation initiation factor 3 subunit, putative [Source:UniProtKB/TrEMBL;Acc:D0P366]	-1.0674	-0.27182	-1.9891	46
PITG_01042			PITG_14608	39S ribosomal protein L24, mitochondrial, putative [Source:UniProtKB/TrEMBL;Acc:D0NQP0]	-1.1228	-0.32652	-1.988	47
PITG_12151			PITG_13174	Translation initiation factor IF-2, putative [Source:UniProtKB/TrEMBL;Acc:D0NJS1]	-0.89001	-0.49246	-1.9582	48
PITG_04843			PITG_05174	50S ribosomal protein L35 [Source:UniProtKB/TrEMBL;Acc:D0N3Q4]	-1.0871	-0.32161	-1.9526	49
PITG_04382			PITG_20386	Eukaryotic translation initiation factor 5B [Source:UniProtKB/TrEMBL;Acc:D0P1T1]	-0.95635	-0.10644	-1.9099	50
PITG_18251			PITG_04382	50S ribosomal protein L27 [Source:UniProtKB/TrEMBL;Acc:D0N152]	-0.92557	-0.2457	-1.8597	51
PITG_05009			PITG_19551	Putative uncharacterized protein [Source:UniProtKB/TrEMBL;Acc:D0P0B2]	-1.0484	-0.38596	-1.8587	52
PITG_11111			PITG_08100	Elongation factor G, putative [Source:UniProtKB/TrEMBL;Acc:D0N9G7]	-0.88358	0	-1.8334	53
PITG_03178			PITG_08579	Isoleucyl-tRNA synthetase [Source:UniProtKB/TrEMBL;Acc:D0NAY8]	-0.86591	-0.3614	-1.8248	54
PITG_06482			PITG_09627	Ribosomal protein L23, putative [Source:UniProtKB/TrEMBL;Acc:D0NCF6]	-0.95503	-0.38538	-1.8208	55
PITG_06995			PITG_17240	Eukaryotic translation initiation factor 3 subunit E-interacting protein, putative [Source:UniProtKB/TrEMBL;Acc:D0NVK9]	-0.98526	-0.27186	-1.8079	56
PITG_07234			PITG_06819	Transcription elongation factor, putative [Source:UniProtKB/TrEMBL;Acc:D0N869]	-0.85782	-0.23245	-1.8036	57
PITG_07141			PITG_01217	Transmembrane protein, putative [Source:UniProtKB/TrEMBL;Acc:D0MUX9]	-0.57408	0	-1.8031	58
PITG_14729			PITG_12697	30S ribosomal protein S9 [Source:UniProtKB/TrEMBL;Acc:D0NKZ4]	-0.9168	-0.4886	-1.7577	59
PITG_09846			PITG_09234	Cysteinyl-tRNA synthetase, putative [Source:UniProtKB/TrEMBL;Acc:D0NB70]	-0.74214	-0.4484	-1.7413	60
PITG_00302			PITG_07141	Methionyl-tRNA synthetase, putative [Source:UniProtKB/TrEMBL;Acc:D0N7D5]	-0.78385	-0.61108	-1.7312	61
PITG_03274			PITG_09932	Translation initiation factor eIF-2B subunit epsilon, putative [Source:UniProtKB/TrEMBL;Acc:D0NDW0]	-0.7775	-0.36378	-1.7247	62
PITG_14278			PITG_18518	Translation initiation factor eIF-2B subunit alpha, putative [Source:UniProtKB/TrEMBL;Acc:D0NY85]	-0.64976	-0.49144	-1.7063	63
PITG_06222			PITG_09506	30S ribosomal protein S5, putative [Source:UniProtKB/TrEMBL;Acc:D0NC61]	-0.73227	-0.14804	-1.6866	64
PITG_14557			PITG_04992	Arginyl-tRNA synthetase, putative [Source:UniProtKB/TrEMBL;Acc:D0N2I8]	-0.68161	-0.54612	-1.6697	65
PITG_22135			PITG_19448	50S ribosomal protein L17, putative [Source:UniProtKB/TrEMBL;Acc:D0P085]	-0.86568	-0.32929	-1.6664	66
PITG_05694			PITG_04487	Putative uncharacterized protein [Source:UniProtKB/TrEMBL;Acc:D0N1D6]	-0.97611	0	-1.6543	67
PITG_13735			PITG_01184	Eukaryotic translation initiation factor 3 subunit G [Source:UniProtKB/TrEMBL;Acc:D0MUU9]	-0.81998	-0.26479	-1.6435	68
PITG_05171			PITG_07885	Eukaryotic translation initiation factor 2 subunit alpha [Source:UniProtKB/TrEMBL;Acc:D0NA23]	-0.79609	-0.27465	-1.5433	69
PITG_02547			PITG_12535	Eukaryotic peptide chain release factor subunit 1 [Source:UniProtKB/TrEMBL;Acc:D0NKS2]	-0.48442	0	-1.5366	70
PITG_07885			PITG_09555	Ubiquitin-ribosomal fusion protein, putative [Source:UniProtKB/TrEMBL;Acc:D0NC98]	-0.22447	0	-1.5175	71
PITG_12077			PITG_17733	Putative uncharacterized protein [Source:UniProtKB/TrEMBL;Acc:D0NYJ6]	-1.1471	0	-1.4783	72
PITG_03398			PITG_04703	Putative uncharacterized protein [Source:UniProtKB/TrEMBL;Acc:D0N1U9]	0	0	-1.4467	73
PITG_03221			PITG_15393	Eukaryotic translation initiation factor, putative [Source:UniProtKB/TrEMBL;Acc:D0NR52]	-0.93412	0	-1.424	74
PITG_17785			PITG_15566	RNA polymerase I-specific transcription initiation factor rrn3, putative [Source:UniProtKB/TrEMBL;Acc:D0NT31]	-0.86299	0	-1.4125	75
PITG_03956			PITG_06222	Lysyl-tRNA synthetase [Source:UniProtKB/TrEMBL;Acc:D0N4C9]	-0.97682	-0.58309	-1.4098	76
PITG_19999			PITG_05301	Translation elongation factor 1-alpha, putative [Source:UniProtKB/TrEMBL;Acc:D0N412]	-0.8723	-0.25151	-1.3911	77
PITG_15723			PITG_20264	40S ribosomal protein S13 [Source:UniProtKB/TrEMBL;Acc:D0P2D2]	-0.33591	0	-1.3727	78
PITG_03762			PITG_07888	Putative uncharacterized protein [Source:UniProtKB/TrEMBL;Acc:D0NA26]	-0.54765	-0.42945	-1.3691	79
PITG_03322			PITG_01255	Eukaryotic translation initiation factor 5, putative [Source:UniProtKB/TrEMBL;Acc:D0MV15]	-1.1785	0	-1.3655	80
PITG_08681			PITG_01762	Glycyl-tRNA synthetase [Source:UniProtKB/TrEMBL;Acc:D0MU13]	-0.58006	-0.4974	-1.3627	81
PITG_09506			PITG_03915	Glutamyl-tRNA(Gln) amidotransferase subunit, putative [Source:UniProtKB/TrEMBL;Acc:D0MYV2]	-0.66629	-0.61865	-1.3601	82
PITG_20264			PITG_07797	Methionyl-tRNA synthetase, putative [Source:UniProtKB/TrEMBL;Acc:D0N9U7]	-1.0129	-0.41747	-1.3564	83
PITG_09234			PITG_12864	Asparaginyl-tRNA synthetase [Source:UniProtKB/TrEMBL;Acc:D0NLB9]	-0.7031	-0.3715	-1.3547	84
PITG_06771			PITG_21071	Threonyl-tRNA synthetase [Source:UniProtKB/TrEMBL;Acc:D0P3H8]	-0.68666	-0.5533	-1.3514	85
PITG_05781			PITG_11923	Mitochondrial 39-S ribosomal protein L47, putative [Source:UniProtKB/TrEMBL;Acc:D0NHJ5]	-0.64229	-0.23256	-1.3263	86
PITG_01041			PITG_14456	Glutamyl-tRNA synthetase, putative [Source:UniProtKB/TrEMBL;Acc:D0NPW4]	-0.21598	-0.49551	-1.2961	87
PITG_09932			PITG_07841	Glycyl-tRNA synthetase [Source:UniProtKB/TrEMBL;Acc:D0N9Y4]	-0.56005	-0.32883	-1.2942	88
PITG_00397			PITG_19007	Putative uncharacterized protein [Source:UniProtKB/TrEMBL;Acc:D0NYR2]	-0.67136	-0.29684	-1.2805	89
PITG_22020			PITG_17748	Leucyl-tRNA synthetase, putative [Source:UniProtKB/TrEMBL;Acc:D0NWC3]	-0.72633	-0.5575	-1.2766	90
PITG_17607			PITG_03322	Prolyl-tRNA synthetase, putative [Source:UniProtKB/TrEMBL;Acc:D0MZY3]	-0.5176	-0.38046	-1.2652	91
PITG_14044			PITG_13600	Eukaryotic translation initiation factor 3 subunit, putative [Source:UniProtKB/TrEMBL;Acc:D0NMD0]	-0.95148	-0.18207	-1.2595	92
PITG_19157			PITG_10974	Elongation factor 1-gamma, putative [Source:UniProtKB/TrEMBL;Acc:D0NFV6]	-0.614	0	-1.2499	93
PITG_08959			PITG_11111	Leucyl-tRNA synthetase, cytoplasmic, putative [Source:UniProtKB/TrEMBL;Acc:D0NG73]	-0.70777	-0.3881	-1.2312	94
PITG_02580			PITG_20747	Transcription elongation factor B polypeptide 1 [Source:UniProtKB/TrEMBL;Acc:D0P2B1]	-0.59743	-0.37492	-1.2105	95
PITG_01217			PITG_05649	Glutamyl-tRNA synthetase, putative [Source:UniProtKB/TrEMBL;Acc:D0N3C3]	-0.51232	-0.2474	-1.1906	96
PITG_20798			PITG_01036	Phenylalanyl-tRNA synthetase alpha chain [Source:UniProtKB/TrEMBL;Acc:D0MSA5]	-0.61375	-0.31506	-1.1631	97
Novel00841			PITG_04918	Alanyl-tRNA synthetase, putative [Source:UniProtKB/TrEMBL;Acc:D0N2D2]	-0.69176	-0.5114	-1.1455	98
PITG_04918			PITG_07839	Translation initiation factor eIF-2B subunit gamma, putative [Source:UniProtKB/TrEMBL;Acc:D0N9Y2]	-0.58883	-0.62268	-1.1373	99
PITG_02053			PITG_08369	Valyl-tRNA synthetase [Source:UniProtKB/TrEMBL;Acc:D0NAF6]	-0.56429	-0.50663	-1.1361	100
PITG_06048			PITG_07062	Aspartyl/glutamyl-tRNA(Asn/Gln) amidotransferase subunit B [Source:UniProtKB/TrEMBL;Acc:D0N761]	-0.54153	0	-1.1163	101
PITG_06799			PITG_12839	Putative uncharacterized protein [Source:UniProtKB/TrEMBL;Acc:D0NLA2]	-0.70264	0	-1.1057	102
PITG_07173			PITG_05405	Arginyl-tRNA synthetase, putative [Source:UniProtKB/TrEMBL;Acc:D0N2R1]	-0.73707	-0.12563	-1.0903	103
PITG_03978			PITG_12961	Alanyl-tRNA synthetase, mitochondrial [Source:UniProtKB/TrEMBL;Acc:D0NJY9]	-0.58518	-0.46856	-1.0755	104
PITG_05058			PITG_03274	Elongation factor P, putative [Source:UniProtKB/TrEMBL;Acc:D0MZT7]	-0.31637	0	-1.0278	105
PITG_12947			PITG_03916	Ribosomal protein L28, putative [Source:UniProtKB/TrEMBL;Acc:D0MYV3]	-0.50097	0	-1.0182	106
PITG_15566			PITG_14609	Eukaryotic translation initiation factor 2 subunit beta [Source:UniProtKB/TrEMBL;Acc:D0NQP1]	-0.49563	0	-1.004	107
PITG_03915			PITG_02580	Putative uncharacterized protein [Source:UniProtKB/TrEMBL;Acc:D0MWP7]	-0.48899	-0.30653	-0.99785	108
PITG_16741			PITG_05685	Transcription elongation factor SPT5, putative [Source:UniProtKB/TrEMBL;Acc:D0N3F8]	-0.4366	-0.64062	-0.97934	109
PITG_04774			PITG_10480	Translation initiation factor eIF-2B subunit beta, putative [Source:UniProtKB/TrEMBL;Acc:D0NFE8]	-0.60067	-0.22118	-0.96636	110
PITG_02921			PITG_05007	Glutaminyl-tRNA synthetase, putative [Source:UniProtKB/TrEMBL;Acc:D0N2K2]	-0.53463	-0.49427	-0.93455	111
PITG_03768			PITG_11734	50S ribosomal protein L3-2 [Source:UniProtKB/TrEMBL;Acc:D0NIF6]	-0.61828	-0.37503	-0.90332	112
PITG_00631			PITG_09846	Prolyl-tRNA synthetase, putative [Source:UniProtKB/TrEMBL;Acc:D0NEQ1]	-0.71201	-0.33624	-0.8988	113
PITG_03661			PITG_06440	Eukaryotic translation initiation factor 2A, putative [Source:UniProtKB/TrEMBL;Acc:D0N4V7]	-0.57598	-0.30852	-0.85579	114
PITG_13371			PITG_13735	Peptide chain release factor, putative [Source:UniProtKB/TrEMBL;Acc:D0NMN6]	0	-0.46456	-0.85287	115
PITG_16915			PITG_16669	Transcription factor IIIB, putative [Source:UniProtKB/TrEMBL;Acc:D0NVC1]	-0.2869	0	-0.83773	116
PITG_01756			PITG_16328	Tyrosyl-tRNA synthetase, putative [Source:UniProtKB/TrEMBL;Acc:D0NU10]	-0.51657	-0.2874	-0.83672	117
PITG_09525			PITG_16023	Transcription initiation factor TFIID subunit, putative [Source:UniProtKB/TrEMBL;Acc:D0NSP2]	-0.24365	-0.41116	-0.83655	118
PITG_13174			PITG_18251	Peptide chain release factor 1 [Source:UniProtKB/TrEMBL;Acc:D0NXQ3]	0	0	-0.81945	119
PITG_02694			PITG_14668	Transcription initiation factor TFIID subunit, putative [Source:UniProtKB/TrEMBL;Acc:D0NQT7]	0	0	-0.79753	120
PITG_16556			PITG_16741	Isoleucyl-tRNA synthetase [Source:UniProtKB/TrEMBL;Acc:D0NVI3]	-0.58419	-0.17087	-0.79262	121
PITG_03712			PITG_10979	Elongation factor 1-gamma, putative [Source:UniProtKB/TrEMBL;Acc:D0NFW0]	-0.34144	0	-0.78455	122
PITG_09627			PITG_12151	Aspartyl-tRNA synthetase, putative [Source:UniProtKB/TrEMBL;Acc:D0NJ60]	-0.44308	-0.36927	-0.75668	123
PITG_10202			PITG_14278	Eukaryotic translation initiation factor 4 gamma, putative [Source:UniProtKB/TrEMBL;Acc:D0NP07]	-0.42632	-0.33942	-0.73901	124
PITG_15090			PITG_05354	Asparaginyl-tRNA synthetase [Source:UniProtKB/TrEMBL;Acc:D0N451]	-0.23142	0	-0.69225	125
PITG_17205			PITG_03799	Eukaryotic initiation factor 4E, putative [Source:UniProtKB/TrEMBL;Acc:D0MYJ6]	-0.32848	0	-0.67693	126
PITG_13500			PITG_14557	Putative uncharacterized protein [Source:UniProtKB/TrEMBL;Acc:D0NQI9]	-0.43061	-0.51971	-0.61854	127
PITG_17093			PITG_09791	Seryl-tRNA synthetase [Source:UniProtKB/TrEMBL;Acc:D0NCU4]	-0.4731	-0.4012	-0.60692	128
PITG_20386			PITG_06505	Eukaryotic translation initiation factor 2-alpha kinase, putative [Source:UniProtKB/TrEMBL;Acc:D0N503]	0	0	-0.53696	129
PITG_12524			PITG_01756	Negative elongation factor, putative [Source:UniProtKB/TrEMBL;Acc:D0MU08]	-0.19698	0	-0.53357	130
PITG_07797			PITG_17727	Putative uncharacterized protein [Source:UniProtKB/TrEMBL;Acc:D0NYJ0]	0	0	-0.36567	131
PITG_10916			PITG_14577	Putative uncharacterized protein [Source:UniProtKB/TrEMBL;Acc:D0NQK9]	0	0	0.3078	132
PITG_12483			PITG_00388	Putative uncharacterized protein [Source:UniProtKB/TrEMBL;Acc:D0MQN6]	0.2722	0	0.44661	133
PITG_03802			PITG_11468	Peptide deformylase, putative [Source:UniProtKB/TrEMBL;Acc:D0NIU8]	0	0	0.91298	134
PITG_14456			PITG_03660	60S ribosomal protein L6, putative [Source:UniProtKB/TrEMBL;Acc:D0MY70]	0.48466	0.81469	1.0347	135
PITG_05649			Novel01157	gag-pol fusion protein [Rhizophagus irregularis DAOM 197198w]	0.49607	1.1041	1.3414	136
PITG_08714			PITG_17009	Selenocysteine-specific elongation factor, putative [Source:UniProtKB/TrEMBL;Acc:D0NUK8]	0.27305	0.33139	1.4043	137
PITG_09540			PITG_19121	60S ribosomal protein L10 [Source:UniProtKB/TrEMBL;Acc:D0NYW1]	0.28971	0	1.4402	138
PITG_06440			PITG_17651	Putative uncharacterized protein [Source:UniProtKB/TrEMBL;Acc:D0NWJ6]	0	0	1.4785	139
PITG_11734			Novel01095	piggybac-derived 2 (agap012114-pa) [Nosema apis BRL 01]	0.73911	1.2883	1.7604	140
PITG_15069			Novel00907	hypothetical protein PHACADRAFT_58702, partial [Phanerochaete carnosa HHB-10118-sp]>gi|409038381|gb|EKM48439.1| hypothetical protein PHACADRAFT_58702, partial [Phanerochaete carnosa HHB-10118-sp]	1.2719	0	2.9959	141
PITG_21886
Novel00015
PITG_15810
PITG_05174
PITG_09521
PITG_15697
PITG_14850
PITG_03420
PITG_11110
PITG_06722
PITG_08100
PITG_13831
PITG_13681
PITG_14913
PITG_16008
PITG_10887
PITG_01833
PITG_07841
PITG_14596
PITG_13600
PITG_16023
PITG_10863
PITG_22657
PITG_06596
PITG_04334
PITG_12864
PITG_12535
PITG_01762
PITG_09289
PITG_15638
PITG_03480
PITG_02992
PITG_18018
PITG_20188
PITG_03235
PITG_03999
PITG_10263
PITG_02039
PITG_11560
PITG_12697
PITG_02578
PITG_04703
PITG_16669
PITG_16198
PITG_19448
PITG_01184
PITG_01943
PITG_10110
PITG_06821
PITG_04729
PITG_19007
PITG_07062
PITG_06636
PITG_10480
PITG_09552
PITG_09555
PITG_17733
PITG_16757
PITG_09631
PITG_08369
PITG_08703
PITG_03353
PITG_17240
PITG_03486
PITG_00941
PITG_10979
PITG_05405
PITG_10941
PITG_12839
PITG_04640
PITG_11766
PITG_20189
PITG_04487
PITG_09563
PITG_06819
PITG_14668
PITG_13676
PITG_19280
PITG_09866
PITG_18054
PITG_03916
PITG_12193
PITG_05301
PITG_08548
PITG_04992
PITG_08834
PITG_20795
PITG_07300
PITG_21071
PITG_05685
PITG_06505
PITG_14608
PITG_01922
PITG_21661
PITG_18518
PITG_03294
PITG_14609
PITG_12961
PITG_17727
PITG_05354
PITG_10193
PITG_08809
PITG_00910
PITG_00179
PITG_06237
PITG_21393
PITG_10974
PITG_19669
PITG_07839
PITG_22323
PITG_03799
PITG_07269
PITG_01255
PITG_03399
PITG_00523
PITG_17748
PITG_00443
PITG_16328
PITG_19551
PITG_18052
PITG_10146
PITG_20747
PITG_01036
PITG_03993
PITG_03460
PITG_20116

## Sheet: Table S8J
The synergistic DEGs in the GO terms of structural constituent of ribosome
				log2FoldChange
Total DEGs in structural constituent of ribosome			Synergistic DEGs in structural constituent of ribosome	AZD	RAP	RAP+AZD
PITG_04337			PITG_06596	-1.2658	-0.18773	-2.8435		structural constituent of ribosome					down	up
PITG_21503			PITG_18054	-0.9877	-0.15493	-2.5731		ratio of synergistic DEGs				Number of synergistic DEGs	33	5
Novel01230			PITG_03768	-1.0332	-0.22317	-2.5447		0.311475				ratio	0.868421	0.131579
PITG_04337			PITG_08548	-1.3863	-0.39198	-2.4312
Novel01095			PITG_09525	-1.2178	-0.24398	-2.3598
PITG_19121			PITG_09521	-0.96955	0	-2.3156
Novel01157			PITG_17785	-1.2918	-0.6026	-2.3098
Novel00167			PITG_12193	-0.99172	-0.27516	-2.2273
PITG_00388			PITG_14729	-1.2669	0	-2.208
PITG_03660			PITG_20798	-1.1589	-0.49495	-2.1841
PITG_20116			PITG_03420	-1.2542	-0.17443	-2.1718
Novel00015			PITG_00523	-1.1632	-0.34026	-2.159
PITG_15069			PITG_09631	-0.88021	-0.27741	-2.1393
PITG_11734			PITG_20116	-0.70509	0	-2.1278
PITG_18052			PITG_06636	-0.82566	-0.31728	-2.083
PITG_10146			PITG_19157	-0.8198	-0.54308	-2.0455
PITG_07269			PITG_19531	-0.86799	-0.39807	-2.003
PITG_00523			PITG_14608	-1.1228	-0.32652	-1.988
PITG_00443			PITG_05174	-1.0871	-0.32161	-1.9526
PITG_09540			PITG_04382	-0.92557	-0.2457	-1.8597
PITG_22323			PITG_09627	-0.95503	-0.38538	-1.8208
PITG_15090			PITG_01217	-0.57408	0	-1.8031
PITG_17093			PITG_12697	-0.9168	-0.4886	-1.7577
PITG_19669			PITG_09506	-0.73227	-0.14804	-1.6866
PITG_13500			PITG_19448	-0.86568	-0.32929	-1.6664
PITG_10202			PITG_04487	-0.97611	0	-1.6543
PITG_06237			PITG_09555	-0.22447	0	-1.5175
PITG_00179			PITG_20264	-0.33591	0	-1.3727
PITG_09525			PITG_11923	-0.64229	-0.23256	-1.3263
PITG_10193			PITG_19007	-0.67136	-0.29684	-1.2805
PITG_08809			PITG_12839	-0.70264	0	-1.1057
PITG_02694			PITG_03916	-0.50097	0	-1.0182
PITG_09627			PITG_11734	-0.61828	-0.37503	-0.90332
PITG_01922			PITG_00388	0.2722	0	0.44661
PITG_13371			PITG_03660	0.48466	0.81469	1.0347
PITG_14608			Novel01157	0.49607	1.1041	1.3414
PITG_03294			PITG_19121	0.28971	0	1.4402
PITG_08834			Novel01095	0.73911	1.2883	1.7604
PITG_20795
PITG_07300
PITG_03768
PITG_00631
PITG_06799
PITG_07173
PITG_02053
PITG_12193
PITG_08548
PITG_12947
PITG_18054
PITG_03916
Novel00841
PITG_19157
PITG_08959
PITG_13676
PITG_20798
PITG_19280
PITG_01217
PITG_20189
PITG_04487
PITG_09563
PITG_11766
PITG_00941
PITG_12839
PITG_06771
PITG_20264
PITG_09506
PITG_03486
PITG_01041
PITG_17785
PITG_08703
PITG_03353
PITG_15723
PITG_03762
PITG_19999
PITG_16757
PITG_03221
PITG_09631
PITG_06636
PITG_09552
PITG_09555
PITG_19007
PITG_05171
PITG_22135
PITG_01943
PITG_02578
PITG_12697
PITG_16198
PITG_19448
PITG_14729
PITG_10263
PITG_20188
PITG_03178
PITG_06995
PITG_03235
PITG_06596
PITG_04382
PITG_04334
PITG_05009
PITG_15638
PITG_01042
PITG_10863
PITG_04843
PITG_11923
PITG_13681
Novel01297
PITG_11099
PITG_14913
PITG_10887
PITG_16008
PITG_01833
PITG_15407
PITG_09442
PITG_03239
PITG_17261
PITG_09345
PITG_14850
PITG_03420
PITG_19531
PITG_09521
PITG_15697
PITG_05174
PITG_12745

[truncated: 1 more sheets: Table S8K]
